# Supplementary material for: Redox-associated messenger RNAs identify novel prognostic values and influence the tumor immune microenvironment of lung adenocarcinoma
Source: Front Genet. 2023 Feb 16;14:1079035. doi: 10.3389/fgene.2023.1079035 (PMC9977811; doi:10.3389/fgene.2023.1079035)
Supplement: Supplementary file 7 [file Table4.XLSX]

## Sheet: A-B
gene	logFC	AveExpr	t	P.Value	adj.P.Val	B
INSL4	-2.95198	0.431495	-19.0507	1.45926e-61	2.02209e-57	128.704
S100P	-4.05057	5.55909	-15.573	4.79371e-45	3.32132e-41	91.3368
AKR1C1	-3.8595	3.08824	-15.1868	2.8362e-43	1.31004e-39	87.326
AKR1C3	-3.18018	4.19097	-15.0737	9.29871e-43	3.22131e-39	86.1588
AVPI1	-1.49038	4.42455	-15.0365	1.37305e-42	3.80528e-39	85.7756
ABCC2	-2.47952	0.741895	-14.8876	6.51399e-42	1.50441e-38	84.2452
SLC7A11	-1.97376	2.31484	-14.6905	5.06967e-41	1.00358e-37	82.2282
PPP2R2C	-2.01532	1.08148	-13.9769	7.76222e-38	1.34451e-34	75.0193
CYP4F11	-2.39036	1.57687	-13.685	1.48959e-36	2.29347e-33	72.1155
PGD	-1.26351	6.34392	-13.4296	1.93023e-35	2.67472e-32	69.5977
SRXN1	-1.46612	1.7196	-13.3379	4.8135e-35	6.06369e-32	68.6996
UGDH	-1.47845	5.14833	-13.244	1.22412e-34	1.41356e-31	67.7823
HGD	-2.53707	2.51435	-13.2266	1.45448e-34	1.55037e-31	67.6128
GSR	-1.27251	5.32162	-13.1659	2.65241e-34	2.62532e-31	67.0224
ALDH3A1	-3.12225	2.60605	-13.1453	3.25232e-34	3.0045e-31	66.822
GPX2	-3.98981	3.81954	-12.8381	6.6585e-33	5.76668e-30	63.8552
KYNU	-1.68717	1.3764	-12.6568	3.89049e-32	3.1712e-29	62.1207
TACC2	-1.37136	3.41937	-12.5933	7.19325e-32	5.5376e-29	61.5169
IDH1	-0.921201	5.46607	-12.4499	2.87076e-31	2.09369e-28	60.1571
CARD14	-1.32578	1.60655	-12.2317	2.31823e-30	1.60619e-27	58.1051
BCAS1	-2.05213	1.95012	-12.194	3.31906e-30	2.19011e-27	57.7525
TALDO1	-0.93162	6.43658	-12.1755	3.95579e-30	2.49161e-27	57.5801
OSGIN1	-1.68453	3.03812	-12.1563	4.74678e-30	2.85983e-27	57.4011
NQO1	-2.0301	5.72405	-12.1156	6.9861e-30	4.0336e-27	57.0215
FXYD4	-2.16264	1.47452	-12.0154	1.8022e-29	9.98921e-27	56.0906
HTATIP2	-0.815419	4.95816	-11.9655	2.88333e-29	1.53671e-26	55.6291
KIAA0319	-1.45472	1.22563	-11.8803	6.42227e-29	3.29605e-26	54.8425
PDE4D	-1.3551	2.70309	-11.6323	6.48621e-28	3.20998e-25	52.5716
GABARAPL1	-0.957	4.71606	-11.6166	7.49905e-28	3.58325e-25	52.4291
AKR1B10	-3.56117	2.39545	-11.4287	4.2388e-27	1.9579e-24	50.7285
NOSTRIN	-1.15917	2.38179	-11.3248	1.09656e-26	4.90162e-24	49.7953
ALDH3B1	-1.34214	4.55609	-11.2647	1.89681e-26	8.2138e-24	49.2574
PLA2G10	-1.93659	2.91412	-11.2516	2.13653e-26	8.9715e-24	49.1406
HYAL1	-1.57787	2.79562	-11.0407	1.43851e-25	5.86277e-23	47.2688
SLC43A3	1.08978	4.40304	10.9996	2.08012e-25	8.23548e-23	46.9068
NRG4	-0.775451	0.523715	-10.9361	3.67071e-25	1.41292e-22	46.3494
PKD1L2	-0.758463	0.501696	-10.8304	9.41645e-25	3.52659e-22	45.425
SEMA4G	-1.19617	2.34156	-10.7696	1.61491e-24	5.88891e-22	44.8957
FGA	-3.40512	2.76364	-10.7664	1.66186e-24	5.90473e-22	44.8676
GDF11	0.729831	1.80482	10.6273	5.66472e-24	1.9624e-21	43.6645
TOB1	-0.960175	5.08653	-10.6214	5.96451e-24	2.01586e-21	43.6139
AIFM2	-0.782666	3.43622	-10.492	1.84996e-23	6.10356e-21	42.5036
PIR	-1.28787	3.15368	-10.4613	2.41627e-23	7.78657e-21	42.2416
TXNRD1	-1.4961	5.41157	-10.4462	2.75611e-23	8.67987e-21	42.1126
FURIN	-1.19572	6.24309	-10.3871	4.60149e-23	1.41695e-20	41.6099
CBR1	-1.46854	5.60867	-10.337	7.09695e-23	2.13788e-20	41.185
TSPAN7	-1.57271	2.99121	-10.1716	2.93574e-22	8.65543e-20	39.7927
REEP2	0.750999	0.992261	10.1546	3.39554e-22	9.80251e-20	39.6501
GCLM	-1.07392	3.61356	-10.1217	4.49336e-22	1.2707e-19	39.3754
CA8	-1.30602	1.04492	-9.79475	7.05958e-21	1.95649e-18	36.6758
NR4A2	-1.40466	3.65533	-9.78642	7.56713e-21	2.05603e-18	36.6078
EML2	-0.64833	3.38847	-9.73208	1.18879e-20	3.16788e-18	36.1652
GKN2	-2.10391	2.18182	-9.70962	1.43219e-20	3.7445e-18	35.9827
KRTCAP3	-1.14591	5.76109	-9.69452	1.62295e-20	4.16468e-18	35.8602
CES1	-1.98919	4.57612	-9.61105	3.23173e-20	8.1422e-18	35.1854
DNMT1	0.593349	3.72823	9.56793	4.60575e-20	1.13968e-17	34.8384
SMURF2	0.682316	3.89027	9.49876	8.11178e-20	1.97202e-17	34.284
FXYD3	-1.68247	4.91748	-9.42566	1.47092e-19	3.51423e-17	33.7012
TESC	-2.28738	4.60137	-9.41329	1.6263e-19	3.81961e-17	33.6029
INHA	-1.86488	1.43402	-9.39615	1.86869e-19	4.31574e-17	33.4668
AKR1C4	-1.15242	0.637563	-9.39067	1.95352e-19	4.43769e-17	33.4234
BBS4	-0.505798	3.01551	-9.38744	2.00535e-19	4.48196e-17	33.3977
PNKD	-0.698777	5.20286	-9.36412	2.42167e-19	5.32653e-17	33.213
CASP9	-0.531531	2.84841	-9.33544	3.05277e-19	6.60973e-17	32.9863
KLHL30	-0.745119	0.954168	-9.32581	3.29935e-19	7.0337e-17	32.9102
FIGNL1	0.673377	2.56922	9.30749	3.8241e-19	8.02888e-17	32.7657
SLC45A4	-0.89965	3.50298	-9.2833	4.64552e-19	9.44478e-17	32.5752
GCLC	-1.43798	3.68164	-9.28247	4.67663e-19	9.44478e-17	32.5687
CPS1	-2.6193	1.25959	-9.28177	4.70297e-19	9.44478e-17	32.5632
PHF19	0.567821	2.89143	9.24543	6.29506e-19	1.24615e-16	32.2778
ABCB6	-0.840338	2.05809	-9.24101	6.522e-19	1.27289e-16	32.2431
CBR3	-1.21888	3.18145	-9.18381	1.03027e-18	1.98284e-16	31.7956
MCEE	-0.536897	3.32824	-9.18138	1.05044e-18	1.99396e-16	31.7766
TXN	-0.733958	7.143	-9.17765	1.08214e-18	2.02638e-16	31.7475
HAL	-1.31959	1.57299	-9.17095	1.14149e-18	2.10902e-16	31.6952
CHMP1B	-0.59623	5.20598	-9.16368	1.20951e-18	2.20529e-16	31.6386
ME1	-1.05387	3.7757	-9.15399	1.30655e-18	2.35128e-16	31.563
NR0B1	-1.97093	0.23231	-9.12995	1.58174e-18	2.81003e-16	31.376
TTC22	-0.719517	2.76857	-9.12105	1.69758e-18	2.97765e-16	31.3068
CPLX2	-1.67996	0.704237	-9.11847	1.73263e-18	3.00114e-16	31.2868
ZNF100	0.556255	1.81887	9.11275	1.81316e-18	3.10184e-16	31.2423
TNC	1.67195	4.55216	9.10985	1.85539e-18	3.13538e-16	31.2198
NMB	-1.02013	3.7071	-9.10594	1.91384e-18	3.19519e-16	31.1895
MSLN	-2.87863	5.81649	-9.08929	2.18366e-18	3.60225e-16	31.0604
FGFR4	-1.16687	2.13802	-9.00855	4.13033e-18	6.65512e-16	30.4367
ATE1	-0.519914	3.12521	-8.97602	5.33347e-18	8.49494e-16	30.1866
BAG1	-0.734788	4.24844	-8.95523	6.27848e-18	9.88647e-16	30.027
ACSL3	-0.557631	4.27726	-8.95267	6.40531e-18	9.97284e-16	30.0075
CMTM3	0.797743	4.64171	8.94073	7.03324e-18	1.08288e-15	29.916
GSTP1	-0.808333	8.38611	-8.93431	7.39548e-18	1.12614e-15	29.8669
SPIRE2	-0.827274	2.43901	-8.91697	8.46918e-18	1.27562e-15	29.7343
TJP3	-0.850725	4.1452	-8.89313	1.02017e-17	1.52005e-15	29.5522
G6PD	-1.1332	5.31541	-8.89129	1.0349e-17	1.5256e-15	29.5382
UGT1A6	-1.64383	1.13311	-8.83478	1.60625e-17	2.34293e-15	29.1082
FA2H	-1.34004	3.34338	-8.81244	1.9101e-17	2.7571e-15	28.9388
EGLN1	-0.59117	3.65523	-8.77576	2.53681e-17	3.62398e-15	28.6613
ZNF462	0.782155	2.16544	8.75444	2.9907e-17	4.18607e-15	28.5003
HMGB2	0.722155	4.83343	8.74952	3.10613e-17	4.30416e-15	28.4633
BLVRB	-0.812152	5.69939	-8.73858	3.37944e-17	4.63653e-15	28.3808
SV2A	0.971396	1.77196	8.73002	3.60969e-17	4.90386e-15	28.3164
ZNF107	0.551222	2.12382	8.68996	4.91061e-17	6.60644e-15	28.0155
MAPK4	-1.07922	0.192613	-8.65847	6.25029e-17	8.32791e-15	27.7797
ABLIM1	-0.883144	4.54321	-8.65647	6.34637e-17	8.3754e-15	27.7647
ATP1B1	-1.08697	7.75284	-8.64368	6.99867e-17	9.14912e-15	27.6691
GPRC5A	-1.16431	6.22472	-8.62434	8.11199e-17	1.04393e-14	27.5248
IRS2	-1.10107	3.33295	-8.62395	8.13631e-17	1.04393e-14	27.5219
TMEM17	-0.601968	1.90699	-8.57902	1.1455e-16	1.45626e-14	27.1875
CSF1	0.819087	4.18264	8.57332	1.19619e-16	1.50687e-14	27.1452
MEX3D	0.666344	4.18515	8.5639	1.28487e-16	1.60401e-14	27.0753
MTHFS	-0.592478	2.63175	-8.53788	1.56514e-16	1.92806e-14	26.8824
GRAMD1B	-0.980466	1.4508	-8.53728	1.57228e-16	1.92806e-14	26.878
PTPRM	-0.773459	3.27155	-8.52956	1.66683e-16	2.02607e-14	26.8209
ZNF92	0.522811	2.70005	8.52499	1.72551e-16	2.07916e-14	26.7871
ENO2	0.914958	4.29583	8.51558	1.85275e-16	2.21324e-14	26.7176
BCAN	-0.647627	0.784201	-8.50027	2.07991e-16	2.45892e-14	26.6046
HCN4	-0.576375	0.391513	-8.46758	2.66128e-16	3.07312e-14	26.3637
PRDX1	-0.67866	7.55467	-8.45826	2.85453e-16	3.26903e-14	26.2952
ABHD4	-0.599562	4.44018	-8.45168	2.99925e-16	3.40661e-14	26.2469
TRIM31	-1.28074	1.78648	-8.45033	3.02994e-16	3.41349e-14	26.2369
OPN3	-1.01454	3.02012	-8.44615	3.12657e-16	3.4926e-14	26.2063
CLYBL	-0.569338	1.35496	-8.44513	3.15058e-16	3.4926e-14	26.1988
ZNF439	0.581327	1.29384	8.44216	3.22179e-16	3.54321e-14	26.177
CABYR	-1.42248	2.2514	-8.43692	3.35104e-16	3.65633e-14	26.1385
SCARB1	-0.725691	3.10512	-8.40982	4.10613e-16	4.41074e-14	25.94
HPD	-0.703068	0.425589	-8.39641	4.53994e-16	4.80229e-14	25.8419
CAB39L	-0.591343	2.47712	-8.30882	8.72069e-16	9.0181e-14	25.2043
EML4	0.573709	4.67612	8.30659	8.86674e-16	9.10122e-14	25.188
TRPC1	0.575443	1.5007	8.28925	1.00833e-15	1.02738e-13	25.0625
EPS8L3	-1.38603	0.762827	-8.28742	1.0221e-15	1.03381e-13	25.0492
KRT83	-0.780708	0.446361	-8.28048	1.07601e-15	1.08045e-13	24.999
FGG	-2.88591	3.93999	-8.26744	1.18508e-15	1.18141e-13	24.9047
SCD5	0.975785	2.6923	8.23657	1.48865e-15	1.47345e-13	24.682
CHPT1	-0.78165	3.02355	-8.23277	1.53088e-15	1.50449e-13	24.6547
GPR161	0.699862	1.70863	8.21407	1.75709e-15	1.71464e-13	24.5202
PANX2	-1.09283	2.98559	-8.19023	2.09375e-15	2.02889e-13	24.349
CCND3	-0.691383	4.82965	-8.165	2.51961e-15	2.40788e-13	24.1683
SPINK4	-1.47657	0.787386	-8.13757	3.08001e-15	2.90338e-13	23.9722
PHLDB1	0.506767	2.75606	8.12772	3.30989e-15	3.09899e-13	23.9019
KCNQ5	0.802817	1.01283	8.12574	3.35794e-15	3.12288e-13	23.8879
CREG1	-0.581617	5.89648	-8.12027	3.4947e-15	3.2284e-13	23.8489
FECH	-0.601933	3.40594	-8.11335	3.67573e-15	3.37315e-13	23.7996
TMED3	-0.595177	3.67674	-8.10686	3.85392e-15	3.51341e-13	23.7534
NACAD	0.669295	1.21863	8.10173	4.00079e-15	3.62081e-13	23.7169
KLF5	-0.817836	5.36366	-8.10094	4.02399e-15	3.62081e-13	23.7113
CNKSR3	0.621812	1.64319	8.0866	4.46682e-15	3.99334e-13	23.6094
RUNX2	0.632921	2.46935	8.08469	4.52927e-15	4.02321e-13	23.5958
GUCA2B	-0.847373	0.356994	-8.04713	5.94986e-15	5.21818e-13	23.3296
SLPI	-1.67043	8.26352	-8.03226	6.62684e-15	5.77535e-13	23.2244
CCDC28B	0.540348	2.03093	8.00686	7.9632e-15	6.8538e-13	23.0451
SLC4A7	0.55662	2.37615	8.00361	8.15216e-15	6.97312e-13	23.0223
SLC7A2	-1.63327	3.12937	-7.99027	8.97615e-15	7.63083e-13	22.9283
BACE1	0.543593	3.22411	7.98718	9.17828e-15	7.75508e-13	22.9066
SMARCA4	0.660444	4.36438	7.97011	1.03795e-14	8.71688e-13	22.7866
FGF12	-0.826856	0.607542	-7.96438	1.08165e-14	9.02258e-13	22.7464
RFK	-0.603932	3.7933	-7.96364	1.08737e-14	9.02258e-13	22.7412
GCNT2	-0.611118	2.83407	-7.9611	1.10745e-14	9.13452e-13	22.7234
TBC1D2	-0.789015	4.6034	-7.94083	1.28107e-14	1.0504e-12	22.5813
CX3CL1	1.17915	4.43346	7.92472	1.438e-14	1.16528e-12	22.4686
PTP4A1	-0.74992	5.87971	-7.91842	1.50444e-14	1.21204e-12	22.4245
SAP30	0.575193	2.83308	7.91162	1.57945e-14	1.26026e-12	22.377
CNN3	0.652822	6.05671	7.88377	1.92748e-14	1.50899e-12	22.1828
FYN	0.622606	3.45371	7.86161	2.25756e-14	1.75747e-12	22.0286
ID1	-1.18645	5.22955	-7.85153	2.42557e-14	1.87771e-12	21.9586
PEX11A	-0.554616	2.37247	-7.82896	2.84775e-14	2.1923e-12	21.8021
ST3GAL4	-0.666416	3.5552	-7.82695	2.88866e-14	2.2115e-12	21.7882
LTBR	-0.532425	5.2328	-7.82591	2.90994e-14	2.21555e-12	21.7811
MAFK	-0.852402	4.2912	-7.81074	3.24082e-14	2.45399e-12	21.6761
KLF4	-1.02074	3.56972	-7.80284	3.42742e-14	2.58118e-12	21.6215
WDR54	0.641796	3.02318	7.80109	3.47005e-14	2.59916e-12	21.6094
GLCE	-0.567685	3.38776	-7.79717	3.56769e-14	2.65793e-12	21.5824
ITGB8	1.12278	2.05431	7.79279	3.68024e-14	2.72711e-12	21.5521
SLC16A4	-1.25401	3.85986	-7.78516	3.88413e-14	2.86289e-12	21.4995
NLGN2	0.610185	3.07532	7.77786	4.08991e-14	2.99862e-12	21.4492
VIM	0.771391	6.86668	7.75727	4.73e-14	3.44966e-12	21.3074
ESPN	1.10114	2.56347	7.75507	4.80366e-14	3.48505e-12	21.2924
DCBLD2	1.05622	3.6919	7.7526	4.88816e-14	3.52788e-12	21.2754
BST2	0.961292	6.84748	7.73044	5.71369e-14	4.10231e-12	21.1232
ZNF85	0.533865	1.50628	7.70899	6.64337e-14	4.74522e-12	20.9763
ZFP36L1	0.667935	6.7628	7.68577	7.81814e-14	5.49929e-12	20.8176
TSPAN8	-1.96097	4.23119	-7.68465	7.87967e-14	5.51458e-12	20.8099
FAM107B	-0.652172	5.13763	-7.67191	8.61435e-14	5.99844e-12	20.7231
CPEB2	-0.512791	2.74808	-7.64628	1.03028e-13	7.1028e-12	20.5486
TMEM25	0.579245	3.19472	7.64434	1.04432e-13	7.16392e-12	20.5354
DMBX1	0.832134	0.657182	7.64083	1.07019e-13	7.27677e-12	20.5116
TSKU	-0.810703	4.48981	-7.64069	1.07127e-13	7.27677e-12	20.5106
CRYGN	0.677601	0.771236	7.63848	1.08785e-13	7.31766e-12	20.4956
SPTB	1.18962	1.82382	7.63456	1.11798e-13	7.45683e-12	20.469
SCARA5	-0.99161	1.40727	-7.6344	1.1193e-13	7.45683e-12	20.4679
PIM3	-0.624034	6.19034	-7.63132	1.14351e-13	7.58161e-12	20.447
CYP2C18	-1.12175	1.58256	-7.62924	1.16024e-13	7.65592e-12	20.4329
IGF1R	-0.719716	3.17509	-7.62195	1.22064e-13	7.97849e-12	20.3834
NT5DC2	0.576701	4.10125	7.61842	1.25102e-13	8.13868e-12	20.3595
SCGB3A2	-2.28652	6.44406	-7.61495	1.28157e-13	8.29846e-12	20.336
LGALS1	0.847649	7.23077	7.61314	1.29775e-13	8.36417e-12	20.3237
PTER	-0.554518	3.38915	-7.60477	1.3755e-13	8.79723e-12	20.267
SIX4	0.662003	2.36808	7.60455	1.37764e-13	8.79723e-12	20.2655
NPAS1	-0.536843	0.776339	-7.59365	1.48589e-13	9.40182e-12	20.1918
STOX2	-0.592743	1.56041	-7.58614	1.56535e-13	9.85959e-12	20.1411
ASF1B	0.670095	3.42061	7.56916	1.76077e-13	1.10403e-11	20.0264
STK17A	0.59749	4.0781	7.56369	1.82876e-13	1.14149e-11	19.9895
COL8A2	0.948945	3.58829	7.56056	1.86873e-13	1.16121e-11	19.9685
TFF1	-2.44483	1.95763	-7.55637	1.92362e-13	1.18998e-11	19.9403
NRM	0.552591	3.57939	7.55127	1.99275e-13	1.22187e-11	19.9059
OXCT1	0.84041	3.06009	7.53929	2.16451e-13	1.31332e-11	19.8253
PDLIM4	1.05289	3.19379	7.53445	2.23809e-13	1.3484e-11	19.7928
FAAH2	-0.704305	3.71043	-7.52544	2.38153e-13	1.42861e-11	19.7323
GLS	0.951249	4.71023	7.52383	2.40798e-13	1.43255e-11	19.7215
SPEG	0.628504	1.04465	7.51885	2.49205e-13	1.47574e-11	19.6881
DUSP4	-1.24243	3.6767	-7.51785	2.5093e-13	1.47963e-11	19.6814
CYB5D2	-0.525958	3.51199	-7.50325	2.77448e-13	1.61537e-11	19.5835
RHOV	-1.36126	3.75715	-7.4899	3.04102e-13	1.75581e-11	19.4942
PSIP1	0.516776	3.39114	7.43404	4.45784e-13	2.50167e-11	19.1217
SLC44A3	-0.677214	3.97641	-7.43399	4.45921e-13	2.50167e-11	19.1214
DPYSL3	0.879922	5.1797	7.42466	4.75223e-13	2.65531e-11	19.0595
CAMK1D	0.8709	3.64316	7.40438	5.45664e-13	3.02451e-11	18.9249
AMDHD1	-0.782319	0.678953	-7.39164	5.95028e-13	3.27195e-11	18.8406
PCSK9	-1.22523	1.44929	-7.3881	6.09518e-13	3.32523e-11	18.8172
RGS10	0.710771	4.9292	7.37952	6.46086e-13	3.51091e-11	18.7605
UMODL1	0.980875	0.955933	7.37536	6.64585e-13	3.59732e-11	18.733
GPR35	-0.936183	1.78529	-7.37441	6.68889e-13	3.60654e-11	18.7267
CCM2	0.510277	3.97984	7.36568	7.09695e-13	3.79821e-11	18.669
FHOD3	0.935248	1.27786	7.36563	7.0992e-13	3.79821e-11	18.6687
RSPO3	-1.11565	1.99496	-7.35414	7.67414e-13	4.09002e-11	18.5929
LDLRAD1	-1.28553	1.84607	-7.34512	8.15719e-13	4.33081e-11	18.5335
STK11	0.509005	3.34831	7.34049	8.4162e-13	4.45127e-11	18.5031
NXPH4	1.1318	1.61724	7.32536	9.32215e-13	4.91167e-11	18.4036
PPARGC1A	-0.95321	1.09703	-7.321	9.60055e-13	5.0392e-11	18.375
PFKFB4	0.625572	2.05426	7.31882	9.7425e-13	5.09441e-11	18.3607
IL1RAP	0.680996	2.35851	7.31619	9.91706e-13	5.16619e-11	18.3434
ARHGAP20	0.739753	1.71989	7.31404	1.00617e-12	5.22189e-11	18.3293
GOLIM4	0.537387	4.53653	7.30467	1.07175e-12	5.52092e-11	18.2679
B4GALNT2	-0.968709	0.871338	-7.29864	1.11613e-12	5.7282e-11	18.2284
SQSTM1	-0.597365	5.97228	-7.2972	1.12699e-12	5.76261e-11	18.219
ARSJ	0.784603	2.33718	7.27132	1.34106e-12	6.80698e-11	18.0497
TCF19	0.560838	3.38365	7.26779	1.37321e-12	6.94476e-11	18.0267
SPSB2	-0.718901	4.13152	-7.25232	1.52325e-12	7.64771e-11	17.9258
CLSTN1	0.500524	5.88568	7.23602	1.69885e-12	8.49857e-11	17.8196
FAM111B	0.702249	2.36171	7.2211	1.87683e-12	9.35514e-11	17.7227
ORM2	-1.43842	1.81257	-7.21341	1.9756e-12	9.79567e-11	17.6728
AMN	-1.01863	2.15629	-7.21313	1.97935e-12	9.79567e-11	17.671
MGST1	-0.817403	5.43727	-7.20423	2.1003e-12	1.03572e-10	17.6133
PLAU	1.22861	5.71112	7.1984	2.18353e-12	1.07295e-10	17.5755
TPD52L1	-0.908713	2.13344	-7.18811	2.33817e-12	1.14488e-10	17.5089
CLEC5A	0.864108	2.53431	7.18543	2.38032e-12	1.16141e-10	17.4916
TUBB2B	1.52805	1.78956	7.17935	2.4784e-12	1.20081e-10	17.4523
LDHD	-0.932053	2.90073	-7.16223	2.77674e-12	1.33601e-10	17.3417
ALS2CL	-0.809848	3.0712	-7.14467	3.11935e-12	1.48539e-10	17.2286
TIAM1	0.588819	2.03329	7.13382	3.3515e-12	1.59047e-10	17.1588
STMN3	0.944509	3.82432	7.11362	3.82967e-12	1.79891e-10	17.0291
GPRC5D	-0.553428	1.62584	-7.1103	3.91438e-12	1.83248e-10	17.0078
IDS	0.594195	4.67378	7.10635	4.01782e-12	1.86829e-10	16.9825
SERPINH1	0.531724	6.09271	7.10249	4.12124e-12	1.90997e-10	16.9578
B3GNT4	0.560754	1.04621	7.10167	4.14373e-12	1.91399e-10	16.9525
TMED6	-1.12042	1.75008	-7.09502	4.32917e-12	1.993e-10	16.9099
TUBA1A	0.677626	5.39888	7.08686	4.56786e-12	2.07996e-10	16.8577
GPR173	0.548686	1.32989	7.08652	4.5781e-12	2.07996e-10	16.8556
CA11	0.742479	3.47575	7.08368	4.66453e-12	2.1123e-10	16.8374
B3GALT4	-0.51264	3.97684	-7.07724	4.86615e-12	2.19599e-10	16.7963
ALDH2	-0.707372	5.36521	-7.07579	4.91273e-12	2.19599e-10	16.787
CA12	-1.36605	2.45577	-7.06349	5.32592e-12	2.37303e-10	16.7085
MXRA7	0.619797	3.64035	7.05729	5.54682e-12	2.46353e-10	16.669
RPS27L	-0.510339	3.17983	-7.04436	6.03711e-12	2.67272e-10	16.5867
SAMD4A	0.65853	2.3781	7.04073	6.18224e-12	2.72826e-10	16.5636
PDK3	0.551367	2.64771	7.03538	6.40243e-12	2.80755e-10	16.5296
HMGA2	1.19712	0.101442	7.03067	6.60289e-12	2.88632e-10	16.4996
SLC9A2	-0.758611	0.60166	-7.01074	7.52044e-12	3.27707e-10	16.3731
FLNA	0.778427	6.67707	6.99422	8.37465e-12	3.61519e-10	16.2686
ORM1	-1.47588	2.31299	-6.98808	8.71649e-12	3.73945e-10	16.2297
SLC35A1	-0.505924	3.75198	-6.98251	9.03785e-12	3.86535e-10	16.1945
CDKN2C	0.569919	2.63811	6.98055	9.15382e-12	3.89093e-10	16.1822
CLU	-1.17251	5.49932	-6.97027	9.78553e-12	4.14673e-10	16.1173
RHOBTB2	-0.871307	4.68951	-6.95687	1.06747e-11	4.48241e-10	16.0328
PLEKHO1	0.578907	3.87119	6.95319	1.09325e-11	4.57677e-10	16.0096
PPFIA4	0.598887	0.705026	6.95053	1.11219e-11	4.62812e-10	15.9929
UPK1B	-1.37145	0.843944	-6.9483	1.12842e-11	4.68158e-10	15.9789
VNN1	-1.05672	1.83111	-6.94722	1.1363e-11	4.70022e-10	15.9721
ZNF714	0.604018	1.63648	6.91681	1.38312e-11	5.67037e-10	15.7812
CKMT1A	-0.849301	1.2218	-6.91431	1.40558e-11	5.73337e-10	15.7655
SLC22A3	-1.1041	3.65809	-6.91373	1.4109e-11	5.73337e-10	15.7619
IDI1	-0.535634	4.31267	-6.90958	1.44919e-11	5.87175e-10	15.7358
CMBL	-1.10502	3.87551	-6.90569	1.48596e-11	6.0032e-10	15.7115
EBPL	-0.524877	4.54153	-6.88893	1.65528e-11	6.66779e-10	15.6067
CA9	1.62135	2.42921	6.88691	1.67694e-11	6.73546e-10	15.5941
TTYH3	0.582618	5.09085	6.88279	1.72186e-11	6.87604e-10	15.5684
GULP1	-0.784445	2.38791	-6.87849	1.77013e-11	7.00867e-10	15.5416
SALL2	0.752508	2.52185	6.87848	1.77025e-11	7.00867e-10	15.5415
CHML	-0.717003	3.00955	-6.8756	1.80337e-11	7.11944e-10	15.5235
PRRT3	0.562077	1.91173	6.85797	2.01927e-11	7.94467e-10	15.4137
MUC1	-1.01113	7.72567	-6.85762	2.02386e-11	7.94467e-10	15.4115
CAPN9	-1.21994	2.19694	-6.85029	2.12105e-11	8.30265e-10	15.3659
HIP1	0.581654	4.02584	6.84543	2.18819e-11	8.51735e-10	15.3357
MYBL1	0.544633	1.22728	6.8422	2.23381e-11	8.64633e-10	15.3156
NETO1	0.523387	0.392237	6.82437	2.5035e-11	9.60971e-10	15.205
ARHGEF16	-0.60857	3.76911	-6.82139	2.55146e-11	9.76673e-10	15.1866
SPR	-0.513517	5.30408	-6.81807	2.60618e-11	9.94871e-10	15.1659
SLFN13	0.712053	3.49486	6.81749	2.61573e-11	9.95773e-10	15.1624
RND1	-1.0836	3.80651	-6.80581	2.81807e-11	1.06694e-09	15.0901
FAM3C	0.64289	4.68411	6.79012	3.11391e-11	1.17254e-09	14.9932
PGC	-2.52013	4.87397	-6.78457	3.22576e-11	1.20484e-09	14.9589
CHST3	0.866826	2.68001	6.7785	3.35253e-11	1.24547e-09	14.9215
GCNT3	-1.40675	3.13546	-6.7594	3.78428e-11	1.40211e-09	14.8039
FAM126A	0.663946	2.29716	6.75857	3.80423e-11	1.40574e-09	14.7988
KIF13B	-0.629149	3.51301	-6.7352	4.41035e-11	1.60405e-09	14.6553
GNAI1	-0.694736	3.24184	-6.73278	4.47826e-11	1.62448e-09	14.6405
PER2	-0.502288	3.4948	-6.73038	4.5467e-11	1.645e-09	14.6258
IYD	-0.958925	1.47591	-6.72527	4.69581e-11	1.69112e-09	14.5945
KLK8	-1.31731	0.837232	-6.72518	4.69858e-11	1.69112e-09	14.5939
UBE2C	0.942885	4.59475	6.72363	4.7447e-11	1.7033e-09	14.5844
SLFN12	0.504961	2.35041	6.70127	5.46257e-11	1.9509e-09	14.4477
MMD	0.668635	3.68852	6.65913	7.11628e-11	2.49646e-09	14.1912
MAOA	-0.962676	5.08872	-6.65471	7.31591e-11	2.54808e-09	14.1644
KCTD12	0.668159	4.91557	6.65418	7.34027e-11	2.54923e-09	14.1611
S100A2	1.40528	3.64205	6.64873	7.59443e-11	2.6309e-09	14.1281
MANSC1	-0.646108	3.46504	-6.63632	8.20715e-11	2.822e-09	14.0529
SLC16A14	-1.1731	2.80722	-6.63573	8.23722e-11	2.82533e-09	14.0493
ADPRHL1	-0.722021	2.24695	-6.63242	8.40906e-11	2.87714e-09	14.0293
GPR84	0.704365	2.06451	6.63019	8.52696e-11	2.90315e-09	14.0158
SGCE	0.728029	3.72356	6.62857	8.61357e-11	2.92545e-09	14.006
ALDH3A2	-0.756504	5.15334	-6.62694	8.70138e-11	2.94354e-09	13.9962
AGA	-0.545892	4.26327	-6.6268	8.70932e-11	2.94354e-09	13.9953
RASGEF1A	-0.804822	2.26649	-6.62339	8.89663e-11	2.99225e-09	13.9746
IGSF21	0.630625	0.981604	6.62224	8.96024e-11	2.99908e-09	13.9677
ECE1	0.535802	5.34842	6.61949	9.11533e-11	3.03633e-09	13.9511
DUOX1	-0.923768	3.11106	-6.61869	9.16106e-11	3.04424e-09	13.9462
OVOL2	-0.627548	3.46945	-6.60028	1.02731e-10	3.38133e-09	13.8351
PAX9	0.894462	1.91034	6.59332	1.07268e-10	3.49745e-09	13.7932
LHPP	-0.532238	3.57987	-6.59061	1.0909e-10	3.5402e-09	13.7769
TRPM8	0.968317	0.7649	6.58828	1.10681e-10	3.57506e-09	13.7629
LAMA3	-1.11928	3.07978	-6.58394	1.13696e-10	3.65541e-09	13.7368
ACE2	-1.00986	2.16055	-6.57853	1.17579e-10	3.77151e-09	13.7043
LMNB1	0.642153	4.04032	6.57654	1.19039e-10	3.80951e-09	13.6923
SIX1	1.07503	3.11139	6.57523	1.20006e-10	3.8228e-09	13.6845
GALNT6	0.955292	3.77127	6.56853	1.25096e-10	3.97582e-09	13.6442
STK39	0.588965	4.39458	6.56688	1.26377e-10	4.00734e-09	13.6343
MMP13	1.56691	2.74687	6.55605	1.35139e-10	4.2754e-09	13.5693
EPAS1	-0.593891	6.13903	-6.5527	1.37963e-10	4.35479e-09	13.5493
MLPH	-0.911213	4.90663	-6.55139	1.39086e-10	4.38027e-09	13.5414
CLDN5	-0.781625	4.12016	-6.55057	1.39788e-10	4.39238e-09	13.5365
THRB	-0.554683	1.57265	-6.54565	1.44103e-10	4.50753e-09	13.5071
DUSP6	0.862338	5.64051	6.53989	1.49319e-10	4.6497e-09	13.4726
ANXA10	-1.39011	0.941912	-6.53742	1.51614e-10	4.71058e-09	13.4578
CCNE2	0.520651	1.32593	6.53541	1.53502e-10	4.75855e-09	13.4458
NFIB	0.582593	3.87721	6.53244	1.56343e-10	4.83581e-09	13.4281
CYP39A1	-0.692106	1.81296	-6.53191	1.5685e-10	4.84069e-09	13.4249
TGFBI	0.941821	5.16142	6.53151	1.57243e-10	4.84204e-09	13.4225
ZNF608	0.534222	2.52805	6.53067	1.58059e-10	4.85533e-09	13.4175
ALOX12P2	-0.633362	1.11238	-6.53034	1.58376e-10	4.85533e-09	13.4155
SFTPD	-1.51463	6.88996	-6.52362	1.65074e-10	5.01631e-09	13.3754
RGS17	0.835115	1.49522	6.51986	1.6894e-10	5.11136e-09	13.3529
ERN2	-1.39229	2.15128	-6.519	1.69836e-10	5.12726e-09	13.3478
CREB5	0.595007	1.2412	6.51424	1.7488e-10	5.25663e-09	13.3195
CMTM4	-0.526437	3.81095	-6.51106	1.78338e-10	5.33744e-09	13.3005
EPHX2	-0.623924	2.52577	-6.4966	1.94908e-10	5.77102e-09	13.2144
GPT	-0.726371	1.49027	-6.49282	1.99478e-10	5.89373e-09	13.1919
IL17RD	0.544971	1.19128	6.49171	2.00842e-10	5.89634e-09	13.1853
RHCG	-0.808808	0.717819	-6.48989	2.03096e-10	5.93133e-09	13.1745
MARVELD3	-0.53985	2.79555	-6.48971	2.03318e-10	5.93133e-09	13.1734
MCM2	0.594083	3.77584	6.4858	2.08246e-10	6.04963e-09	13.1502
SLC26A9	-1.35005	3.67378	-6.46367	2.38461e-10	6.88408e-09	13.019
ELMO3	-0.61195	4.90317	-6.46243	2.40275e-10	6.9086e-09	13.0116
BACE2	-0.857819	3.79754	-6.46241	2.40308e-10	6.9086e-09	13.0115
ATP8B2	0.507272	3.3729	6.44437	2.68273e-10	7.55582e-09	12.9049
AGR2	-1.29841	7.06475	-6.44392	2.69014e-10	7.56133e-09	12.9022
ZNF43	0.527783	1.81072	6.43963	2.76138e-10	7.74584e-09	12.8769
KIAA1549	-0.611045	1.934	-6.43509	2.83891e-10	7.94723e-09	12.8501
TP53I3	-0.568944	4.82347	-6.43051	2.91923e-10	8.15559e-09	12.823
FLRT3	-0.947004	3.75716	-6.42567	3.00636e-10	8.36529e-09	12.7945
GK	-0.637834	2.91029	-6.42418	3.03378e-10	8.42466e-09	12.7857
TM4SF20	-0.664519	0.228537	-6.42202	3.07385e-10	8.51887e-09	12.773
FZD10	-1.13209	0.996729	-6.40215	3.46816e-10	9.55434e-09	12.6562
KLB	-0.710256	0.407561	-6.38767	3.78619e-10	1.03686e-08	12.5712
CA4	-0.810622	1.21284	-6.38233	3.91068e-10	1.06884e-08	12.5399
FAM83H	-0.559263	5.11979	-6.3801	3.96372e-10	1.08121e-08	12.5268
NR4A1	-0.967991	4.28061	-6.36726	4.28369e-10	1.1639e-08	12.4517
RAD54L	0.594241	1.70358	6.36373	4.37588e-10	1.18663e-08	12.431
CDC42EP3	0.613172	3.7864	6.35821	4.52411e-10	1.22204e-08	12.3988
UHRF1	0.581742	2.19419	6.35221	4.69075e-10	1.26459e-08	12.3638
RAP1GAP	-0.972955	4.25915	-6.35167	4.70604e-10	1.26625e-08	12.3606
LRIG3	0.805878	4.02444	6.34972	4.76174e-10	1.27875e-08	12.3492
SEMA3A	0.973125	1.75578	6.34799	4.81163e-10	1.28468e-08	12.3391
ALPP	-0.820474	1.00469	-6.34485	4.9034e-10	1.30166e-08	12.3209
ANKRD13B	0.557681	1.99267	6.33462	5.21465e-10	1.37637e-08	12.2613
GDF5	0.592371	0.703436	6.33311	5.26225e-10	1.38366e-08	12.2525
FHL5	-0.557883	1.62368	-6.33246	5.28294e-10	1.38647e-08	12.2487
DNAJC15	-0.61079	3.17311	-6.32561	5.50496e-10	1.43929e-08	12.2088
EGFR	0.888365	4.01769	6.31826	5.7533e-10	1.49575e-08	12.1661
DOC2B	-0.794987	2.13037	-6.31743	5.78185e-10	1.50036e-08	12.1613
ICAM1	0.839862	6.5992	6.31399	5.90255e-10	1.52882e-08	12.1413
ASAH1	-0.542974	6.48004	-6.30466	6.24189e-10	1.60174e-08	12.0872
HKDC1	-0.975411	3.1227	-6.29481	6.6213e-10	1.68756e-08	12.0301
KCNE3	-0.693341	3.55737	-6.28467	7.03494e-10	1.78868e-08	11.9715
DOCK5	-0.595812	2.66414	-6.27704	7.36306e-10	1.86526e-08	11.9274
DTX3	0.524509	3.56504	6.26571	7.87799e-10	1.98482e-08	11.862
BRIP1	0.511969	1.07188	6.26118	8.0932e-10	2.03166e-08	11.8359
LIMD2	0.564993	3.61768	6.26017	8.142e-10	2.04021e-08	11.8301
EFNB3	0.707664	1.81193	6.24567	8.87606e-10	2.19882e-08	11.7466
PLA2G4A	-1.13677	3.69596	-6.24019	9.16972e-10	2.26094e-08	11.7151
CDCA4	0.50099	3.33492	6.23347	9.54285e-10	2.34876e-08	11.6765
WDR66	0.7357	1.92702	6.22095	1.02785e-09	2.51199e-08	11.6047
TINAG	-0.766893	0.670059	-6.21658	1.05485e-09	2.5689e-08	11.5796
BAG2	-0.626026	2.15041	-6.21213	1.08298e-09	2.63278e-08	11.5541
OGFRL1	0.521465	3.20066	6.20688	1.11713e-09	2.70629e-08	11.5241
SLFN5	0.526433	4.3014	6.19444	1.20241e-09	2.89771e-08	11.453
WASF1	0.563106	2.24062	6.19325	1.21087e-09	2.91302e-08	11.4462
POF1B	-1.08112	2.2092	-6.18797	1.2492e-09	2.98753e-08	11.4161
PRX	-0.576274	2.2413	-6.18431	1.27647e-09	3.04442e-08	11.3952
BNIPL	-0.963466	2.6104	-6.18051	1.30539e-09	3.10803e-08	11.3735
CYP24A1	-1.52078	3.42364	-6.17891	1.31771e-09	3.132e-08	11.3644
LIMK1	0.514217	4.52918	6.17109	1.37985e-09	3.26848e-08	11.3199
CDH3	1.159	4.44312	6.16769	1.40774e-09	3.3242e-08	11.3005
ABHD2	-0.630483	4.84405	-6.16764	1.40817e-09	3.3242e-08	11.3002
CRISP3	-0.78078	0.548668	-6.16276	1.4492e-09	3.41524e-08	11.2725
PIK3C2B	-0.528617	3.2496	-6.1614	1.46086e-09	3.43686e-08	11.2647
IL17RE	-0.669227	3.3192	-6.15673	1.5015e-09	3.52394e-08	11.2382
PEBP4	-1.27905	3.82013	-6.15371	1.52835e-09	3.57138e-08	11.2211
C1orf61	-0.608715	0.332293	-6.15296	1.53511e-09	3.58115e-08	11.2168
WIF1	-1.44114	2.97796	-6.14403	1.61766e-09	3.76107e-08	11.1662
SMPDL3B	-0.751921	5.09132	-6.11643	1.90142e-09	4.36225e-08	11.0099
SIX2	1.04941	1.89893	6.11332	1.9363e-09	4.43494e-08	10.9924
KCNK5	0.796601	4.44334	6.10875	1.98865e-09	4.53236e-08	10.9666
POPDC3	-0.907559	0.737528	-6.0917	2.19656e-09	4.96453e-08	10.8705
MUC13	-1.72142	2.68838	-6.09145	2.19977e-09	4.96453e-08	10.8691
MYO3B	0.570199	0.675046	6.08604	2.27017e-09	5.09851e-08	10.8387
SBSN	0.748737	0.552371	6.07337	2.44382e-09	5.4783e-08	10.7674
KIF15	0.521225	1.36188	6.07285	2.45114e-09	5.4783e-08	10.7645
LMO7	-0.589341	4.70714	-6.07224	2.45984e-09	5.48889e-08	10.7611
DCLK1	0.667788	1.56614	6.0679	2.52272e-09	5.62015e-08	10.7367
DNAJB4	-0.557544	2.8469	-6.05858	2.6629e-09	5.92292e-08	10.6845
TRIM36	0.556807	0.889043	6.05072	2.78709e-09	6.16943e-08	10.6405
COL21A1	0.715223	1.90821	6.04874	2.8192e-09	6.23056e-08	10.6294
PTK6	-0.853204	3.94973	-6.04343	2.90716e-09	6.41472e-08	10.5997
SORD	-0.509966	2.79492	-6.03954	2.97341e-09	6.55048e-08	10.578
PTK7	0.543576	4.94837	6.03784	3.00271e-09	6.60453e-08	10.5685
PSCA	-1.51141	2.07435	-6.0373	3.01214e-09	6.61477e-08	10.5655
COL11A1	1.33079	3.11805	6.03536	3.0461e-09	6.6647e-08	10.5546
IRS1	0.6814	2.8842	6.03519	3.04913e-09	6.6647e-08	10.5537
TST	-0.627606	5.0314	-6.03504	3.05181e-09	6.6647e-08	10.5528
EGFL7	-0.68551	4.6372	-6.03478	3.05637e-09	6.6647e-08	10.5514
CAPN5	-0.771548	3.52885	-6.02957	3.1498e-09	6.83049e-08	10.5223
IFITM1	0.763767	6.82806	6.01907	3.34664e-09	7.2347e-08	10.4637
EDNRB	-0.664127	2.31956	-6.01647	3.39714e-09	7.30965e-08	10.4493
DPYD	0.65152	3.77287	6.01156	3.49466e-09	7.48462e-08	10.4219
SAMHD1	0.526893	5.16082	6.01042	3.51776e-09	7.52246e-08	10.4156
WFDC10B	0.883607	2.10148	6.00546	3.6196e-09	7.70514e-08	10.388
FRMD5	0.641034	1.47082	6.00545	3.61986e-09	7.70514e-08	10.388
NRP1	0.521859	4.56885	6.00298	3.67174e-09	7.79162e-08	10.3742
SORBS2	-0.786919	2.46092	-6.0016	3.70092e-09	7.84153e-08	10.3666
TOP2A	0.725007	3.9868	6.00046	3.72537e-09	7.8813e-08	10.3602
MYO1G	0.803586	2.92483	5.99934	3.74949e-09	7.90817e-08	10.354
FGB	-2.16815	1.96187	-5.99698	3.80074e-09	8.00408e-08	10.3409
AMBP	-1.18576	0.899956	-5.98893	3.98069e-09	8.34499e-08	10.2962
IFI16	0.691105	4.89508	5.97597	4.28813e-09	8.96239e-08	10.2244
OVGP1	-0.614921	2.19464	-5.97235	4.37797e-09	9.12264e-08	10.2044
RGL1	0.507824	4.00514	5.97201	4.38659e-09	9.12688e-08	10.2025
LAT2	0.527161	3.16512	5.96449	4.57952e-09	9.48556e-08	10.1609
PIPOX	0.574146	1.10273	5.95856	4.73781e-09	9.78418e-08	10.1281
NHS	0.636498	1.94218	5.95627	4.80027e-09	9.89842e-08	10.1155
CBX2	-0.707087	2.31895	-5.94695	5.06265e-09	1.03777e-07	10.0641
MBOAT1	0.539717	3.74943	5.94596	5.09158e-09	1.04216e-07	10.0586
MEGF9	-0.587878	4.22762	-5.9328	5.48849e-09	1.11703e-07	9.98616
FOLR1	-1.26583	5.72796	-5.93276	5.48961e-09	1.11703e-07	9.98596
GABRB3	-0.740298	0.720542	-5.92739	5.66041e-09	1.14841e-07	9.95639
CILP	1.04582	2.65525	5.90237	6.5259e-09	1.29998e-07	9.8191
TNFRSF18	0.805201	3.09653	5.90227	6.52944e-09	1.29998e-07	9.81857
SMOC1	-1.2498	1.6964	-5.8972	6.72012e-09	1.33602e-07	9.7908
COL1A1	1.01903	8.34196	5.88994	7.00234e-09	1.38419e-07	9.75111
SGK2	-0.672469	1.30042	-5.88397	7.24331e-09	1.41967e-07	9.71847
AIM2	1.03511	3.04477	5.88263	7.29847e-09	1.42644e-07	9.71115
FCN3	-0.905976	3.05022	-5.88015	7.40165e-09	1.44254e-07	9.69761
RORC	-0.722123	3.8747	-5.87739	7.51818e-09	1.46319e-07	9.68254
MICAL2	0.551638	3.79816	5.87679	7.54347e-09	1.464e-07	9.6793
STARD10	-0.579302	5.12898	-5.876	7.5775e-09	1.46855e-07	9.67496
HNF4A	-0.811663	0.643453	-5.87265	7.72222e-09	1.49451e-07	9.65671
BMP6	-1.00832	2.15106	-5.8673	7.95943e-09	1.53827e-07	9.62753
ZNF738	0.502483	1.94274	5.86623	8.00742e-09	1.54539e-07	9.62173
PDPN	0.768474	3.37872	5.86531	8.04943e-09	1.54918e-07	9.61668
SULT1A1	-0.566225	2.46848	-5.86481	8.07195e-09	1.55136e-07	9.61399
ALOX5AP	0.744195	5.28763	5.8631	8.1505e-09	1.56429e-07	9.60465
CYP4F12	-0.595357	0.613118	-5.86096	8.24957e-09	1.58111e-07	9.59299
ATOH8	-0.982513	2.7516	-5.86048	8.27172e-09	1.58317e-07	9.59041
S100A12	-0.717159	1.49668	-5.84936	8.8071e-09	1.67637e-07	9.52992
SPINK1	-2.02868	5.35964	-5.84746	8.9019e-09	1.69209e-07	9.51959
GPC4	0.700394	5.0805	5.84702	8.92372e-09	1.69392e-07	9.51723
ROR1	0.54102	1.61877	5.83522	9.53667e-09	1.79795e-07	9.45317
CLDN7	-0.543583	6.51647	-5.82833	9.91297e-09	1.85641e-07	9.41585
SOCS1	0.57901	3.67793	5.82832	9.91373e-09	1.85641e-07	9.41578
SLC16A5	-0.654486	4.12823	-5.826	1.00437e-08	1.87358e-07	9.40322
CARD6	-0.506516	3.13934	-5.8128	1.08162e-08	2.01181e-07	9.33178
CTSC	0.510474	5.2834	5.80789	1.11174e-08	2.06506e-07	9.3053
RRAGD	0.590574	3.23132	5.80723	1.11586e-08	2.06942e-07	9.30173
C19orf33	-1.08133	6.22526	-5.80148	1.15238e-08	2.12347e-07	9.27069
ADORA1	0.84474	1.94228	5.79728	1.17982e-08	2.15968e-07	9.248
THBS4	0.968563	1.80933	5.79613	1.18738e-08	2.17066e-07	9.24184
AKAP12	-0.876528	2.64963	-5.79091	1.22253e-08	2.23196e-07	9.21372
BTBD11	-0.568299	0.903907	-5.78959	1.23161e-08	2.24493e-07	9.20659
KLF15	-0.739823	2.20678	-5.78828	1.24065e-08	2.25613e-07	9.19954
LYPD3	-0.989575	2.61209	-5.78126	1.29025e-08	2.33712e-07	9.16176
CTHRC1	0.856034	5.46399	5.77619	1.32726e-08	2.39675e-07	9.13449
AADAC	-1.00771	1.80096	-5.77604	1.32836e-08	2.39675e-07	9.1337
PXDN	0.735107	4.00287	5.76161	1.43952e-08	2.57054e-07	9.05625
KRT86	-0.653244	1.74693	-5.76091	1.44521e-08	2.57738e-07	9.05245
PTGES	-0.83946	4.64356	-5.75452	1.49745e-08	2.66027e-07	9.01823
CD274	0.756435	2.78653	5.74307	1.59577e-08	2.82048e-07	8.95695
TM4SF5	-1.1046	0.409865	-5.74084	1.61563e-08	2.85195e-07	8.94504
C8G	-0.614607	1.22026	-5.73647	1.65533e-08	2.9146e-07	8.92165
ADAMTS14	0.540432	1.78309	5.72746	1.73998e-08	3.04816e-07	8.8736
CXCL6	0.995321	1.73716	5.72018	1.81156e-08	3.16954e-07	8.83476
CBLC	-0.731609	4.34466	-5.71983	1.81506e-08	3.17165e-07	8.8329
RASSF8	0.571936	2.40325	5.71808	1.83271e-08	3.19444e-07	8.82358
HAVCR1	-0.847808	1.16143	-5.71606	1.85336e-08	3.22638e-07	8.81279
EID3	-0.546127	1.86877	-5.70513	1.96861e-08	3.40329e-07	8.75468
PLAT	1.03525	4.1254	5.70503	1.96972e-08	3.40329e-07	8.75414
GJB1	-1.28201	2.71963	-5.70406	1.98036e-08	3.41742e-07	8.74894
TUBB2A	0.66548	3.69481	5.70172	2.00611e-08	3.44799e-07	8.7365
MYO5C	-0.523673	3.51107	-5.70045	2.02012e-08	3.46446e-07	8.7298
DKK1	-1.33213	1.37581	-5.69934	2.03259e-08	3.4744e-07	8.72387
SERPINB5	-1.2129	1.38866	-5.6939	2.09441e-08	3.561e-07	8.69502
ITPR1	-0.5285	2.63007	-5.68389	2.2131e-08	3.73987e-07	8.64193
ANKS4B	-0.783331	0.679646	-5.66855	2.40778e-08	4.0393e-07	8.56074
ETNK2	0.628681	2.35518	5.66307	2.48129e-08	4.13261e-07	8.53179
ERBB3	-0.57731	5.22155	-5.65534	2.58882e-08	4.28083e-07	8.49094
TYMS	0.53993	3.25318	5.65359	2.61372e-08	4.3117e-07	8.48173
ITGB3	0.67057	1.4921	5.65072	2.65506e-08	4.36432e-07	8.46662
PKD2L1	-0.509696	1.20612	-5.6473	2.70527e-08	4.44158e-07	8.44859
UBE2L6	0.51699	5.81239	5.64645	2.71797e-08	4.45715e-07	8.44408
CHRDL2	-0.785583	1.75465	-5.64546	2.73268e-08	4.46542e-07	8.43888
CLDN9	0.927708	2.26793	5.6422	2.78191e-08	4.52453e-07	8.42169
VILL	-0.783019	2.45319	-5.64048	2.80806e-08	4.55507e-07	8.41269
MYH14	-0.598818	4.96303	-5.636	2.87767e-08	4.64213e-07	8.38912
RAB25	-0.581536	6.58564	-5.63507	2.89241e-08	4.66048e-07	8.3842
SLC15A1	-0.722465	1.01463	-5.63044	2.96648e-08	4.77427e-07	8.35986
VAV1	0.531769	3.36866	5.6287	2.99471e-08	4.81413e-07	8.35074
ANG	-0.692465	3.48238	-5.62663	3.02879e-08	4.85967e-07	8.33986
TWIST1	0.732229	1.41001	5.62604	3.03859e-08	4.86771e-07	8.33675
PIP5K1B	-0.610073	1.80834	-5.61029	3.311e-08	5.28578e-07	8.25412
RTN4RL2	0.870073	3.04464	5.60858	3.34182e-08	5.32272e-07	8.2452
CORO1A	0.557464	4.51281	5.60506	3.40656e-08	5.39767e-07	8.22674
TLR2	0.607071	4.58806	5.60278	3.449e-08	5.44957e-07	8.21482
DPP4	1.0577	4.85939	5.59701	3.55885e-08	5.60746e-07	8.18465
PAQR5	-0.627846	1.92019	-5.59593	3.57979e-08	5.63055e-07	8.17901
VNN3	-0.532231	0.953753	-5.59143	3.66835e-08	5.7633e-07	8.1555
APOM	-0.50341	1.10384	-5.58906	3.7158e-08	5.82464e-07	8.14313
KCNK3	-0.764737	1.96549	-5.57992	3.90469e-08	6.10691e-07	8.09543
FAM83E	-0.736582	4.46172	-5.57793	3.94696e-08	6.15913e-07	8.08507
BASP1	-0.803738	5.13431	-5.57231	4.06893e-08	6.32099e-07	8.05579
EFS	0.804122	3.16496	5.57165	4.08357e-08	6.33663e-07	8.05233
PF4	-0.572816	1.00944	-5.56484	4.23684e-08	6.53785e-07	8.01689
GPR68	0.598117	3.02107	5.56106	4.32418e-08	6.65779e-07	7.99726
KBTBD11	-0.61601	2.0577	-5.54845	4.62893e-08	7.1112e-07	7.93176
EPHX1	-0.778319	7.061	-5.542	4.79258e-08	7.33821e-07	7.89835
ADAM12	0.731551	2.1219	5.54005	4.84334e-08	7.3833e-07	7.88821
CCK	-0.511789	0.292528	-5.53251	5.04388e-08	7.65532e-07	7.8492
GSTO2	-0.660851	1.7539	-5.52813	5.16428e-08	7.81238e-07	7.82652
RAB17	-0.573049	3.70899	-5.52622	5.2176e-08	7.86721e-07	7.81664
ODC1	-0.900886	5.76203	-5.52264	5.31886e-08	7.97676e-07	7.79816
DQX1	-0.588487	0.476021	-5.52263	5.31899e-08	7.97676e-07	7.79814
DUSP1	-0.739667	7.38524	-5.52007	5.3927e-08	8.07856e-07	7.7849
CDCA8	0.538313	3.17361	5.5122	5.62545e-08	8.39094e-07	7.74428
FAP	0.674585	2.85455	5.50166	5.9523e-08	8.83094e-07	7.68998
LIPH	-0.853616	4.75877	-5.4921	6.26474e-08	9.25486e-07	7.64081
CAMK2N2	0.582193	1.2367	5.48823	6.39586e-08	9.43849e-07	7.6209
PBLD	-0.55034	2.35128	-5.48274	6.5862e-08	9.69873e-07	7.59271
CYP2C9	-0.515425	0.650363	-5.4823	6.60185e-08	9.71144e-07	7.59043
ITGB2	0.680952	5.56827	5.48173	6.62203e-08	9.73081e-07	7.5875
DDIT4L	-0.931888	2.56794	-5.48122	6.63982e-08	9.73629e-07	7.58492
GLI3	0.570097	1.59515	5.48067	6.65961e-08	9.74469e-07	7.58206
GADD45A	0.625054	4.43232	5.47927	6.70925e-08	9.80698e-07	7.57492
PCSK2	-1.23958	1.10947	-5.47811	6.75107e-08	9.84482e-07	7.56895
SLC16A9	1.07864	2.53728	5.47796	6.75646e-08	9.84482e-07	7.56818
TNIK	0.589593	2.53599	5.4733	6.92664e-08	1.00716e-06	7.54428
GCKR	-0.523753	0.382085	-5.46419	7.27121e-08	1.05174e-06	7.49762
AGTR2	-0.906615	1.45546	-5.46221	7.3482e-08	1.06067e-06	7.4875
DNTTIP1	0.566535	5.27624	5.45318	7.70977e-08	1.10523e-06	7.44135
CA2	-0.852922	3.43704	-5.45311	7.71277e-08	1.10523e-06	7.44097
LY6E	0.709151	7.11431	5.42188	9.102e-08	1.287e-06	7.28187
EPN3	-0.6147	2.91148	-5.41769	9.3059e-08	1.31182e-06	7.26059
CAMK2B	0.555379	0.38995	5.41125	9.62843e-08	1.35314e-06	7.22787
BCL2	0.545016	2.06975	5.40454	9.97528e-08	1.39765e-06	7.19388
UCK2	-0.563172	2.65479	-5.40285	1.00647e-07	1.40875e-06	7.18531
PNMA6A	0.671559	1.35907	5.39363	1.0566e-07	1.47444e-06	7.13864
GCNT1	0.626169	2.41042	5.39152	1.06845e-07	1.48711e-06	7.12793
C6orf141	0.704822	1.54392	5.39125	1.06997e-07	1.48711e-06	7.12657
KRT7	-0.742044	7.49935	-5.38544	1.10316e-07	1.5256e-06	7.09723
PMAIP1	0.742252	3.26187	5.38441	1.10916e-07	1.53236e-06	7.09203
MELK	0.600101	2.52845	5.38263	1.11962e-07	1.54527e-06	7.08301
CADM1	0.745118	3.61608	5.38042	1.13267e-07	1.56017e-06	7.07189
MAP2	-0.746772	2.53707	-5.37601	1.15926e-07	1.58891e-06	7.04961
PBX1	-0.51319	2.36527	-5.3731	1.17708e-07	1.61015e-06	7.03497
TRIM29	-1.07559	1.70027	-5.37204	1.18367e-07	1.61597e-06	7.0296
DAPK1	-0.517653	4.04579	-5.37062	1.19253e-07	1.62486e-06	7.02245
SIAE	-0.509395	3.58071	-5.3655	1.22502e-07	1.66745e-06	6.99665
UPK3B	-0.887022	2.09595	-5.36531	1.22619e-07	1.66745e-06	6.99573
MT1H	0.698605	1.21876	5.36145	1.25131e-07	1.69994e-06	6.97626
PTTG1	0.577582	3.68507	5.35819	1.27284e-07	1.71908e-06	6.95988
CHL1	-0.832249	2.36767	-5.34691	1.3503e-07	1.81309e-06	6.90319
SHH	-0.624244	1.6243	-5.33963	1.40267e-07	1.87613e-06	6.86667
FCGR2A	0.554038	4.27721	5.33643	1.4263e-07	1.9059e-06	6.85064
PCSK6	-0.552749	1.29045	-5.3342	1.44298e-07	1.92448e-06	6.83948
GPX3	-0.656484	6.03093	-5.33096	1.46759e-07	1.9498e-06	6.82325
CHI3L2	-0.827595	2.72802	-5.32141	1.54248e-07	2.03952e-06	6.7755
NEO1	-0.549546	3.56965	-5.3211	1.54498e-07	2.04087e-06	6.77395
CDC25B	0.507557	4.92816	5.32065	1.5486e-07	2.04371e-06	6.7717
HAPLN3	0.531757	3.30579	5.31913	1.56091e-07	2.05409e-06	6.7641
PCP4	1.41471	2.44526	5.31732	1.57567e-07	2.06763e-06	6.75507
EMCN	-0.544227	2.77307	-5.3091	1.64458e-07	2.14787e-06	6.71401
SSTR1	-0.684095	0.940028	-5.30729	1.66012e-07	2.16002e-06	6.70499
ALDOC	0.642656	3.55447	5.30519	1.67834e-07	2.18168e-06	6.69452
TPX2	0.630318	3.78392	5.30308	1.69679e-07	2.20258e-06	6.68402
RAC2	0.531141	5.1288	5.29989	1.72518e-07	2.23419e-06	6.66811
FBXO32	0.614893	3.76359	5.29753	1.74639e-07	2.25743e-06	6.65639
PTPRB	-0.516353	2.7659	-5.29693	1.75184e-07	2.25861e-06	6.6534
SRMS	-0.620689	1.47835	-5.29525	1.76718e-07	2.2726e-06	6.64504
FN1	0.761876	6.99191	5.29261	1.79162e-07	2.29875e-06	6.63186
ALDH3B2	-0.777582	2.4025	-5.28651	1.84914e-07	2.36383e-06	6.60155
DSE	0.515475	2.64015	5.28619	1.85221e-07	2.36554e-06	6.59996
ISLR	0.667002	5.60637	5.28586	1.85535e-07	2.36737e-06	6.59834
CRABP2	1.29403	6.21129	5.27865	1.92593e-07	2.45004e-06	6.56253
ADH1C	-1.21777	2.79723	-5.27471	1.96561e-07	2.49427e-06	6.54298
TMEM92	-0.643064	3.62032	-5.27085	2.0052e-07	2.535e-06	6.52386
GDA	-0.598645	0.0499761	-5.2669	2.04655e-07	2.58044e-06	6.50428
MMP11	1.07191	4.21873	5.2661	2.05505e-07	2.58645e-06	6.50031
PER3	0.512333	2.53223	5.26522	2.06442e-07	2.59588e-06	6.49595
RNASE6	0.520379	4.46918	5.26379	2.07969e-07	2.61271e-06	6.48888
ZNF682	0.512959	1.44579	5.24564	2.28366e-07	2.85087e-06	6.39918
CLIC3	-0.837672	4.08805	-5.24213	2.32524e-07	2.89495e-06	6.38189
EMB	0.616434	4.48152	5.23636	2.39527e-07	2.97147e-06	6.35344
IMPA2	-0.604892	4.77911	-5.23381	2.42684e-07	3.00162e-06	6.34089
TDRD5	-0.673125	1.08695	-5.22803	2.5e-07	3.08207e-06	6.31242
MT1E	0.803348	4.98341	5.21896	2.61907e-07	3.22027e-06	6.26783
ANKRD29	-0.720891	2.18006	-5.21763	2.63696e-07	3.23652e-06	6.26131
GPX7	0.554403	3.51573	5.21341	2.69451e-07	3.30131e-06	6.24062
THEM5	-0.641135	3.56445	-5.21065	2.73284e-07	3.33941e-06	6.22708
AXL	0.536116	3.73688	5.20933	2.75146e-07	3.35625e-06	6.22057
HCK	0.606527	4.57163	5.20768	2.77475e-07	3.37871e-06	6.2125
STMN1	0.527872	4.47994	5.20564	2.80387e-07	3.40519e-06	6.2025
CSF1R	0.566812	5.26166	5.20418	2.82485e-07	3.42322e-06	6.19535
MDFIC	0.500165	4.05255	5.20409	2.82613e-07	3.42322e-06	6.19492
TMC4	-0.523777	5.66116	-5.19935	2.89554e-07	3.49508e-06	6.17167
PTPN22	0.523107	2.361	5.19132	3.01674e-07	3.6037e-06	6.13239
SPOCK1	0.832564	1.41225	5.18875	3.05649e-07	3.63864e-06	6.11984
NRIP3	0.65666	1.86136	5.18456	3.12252e-07	3.71405e-06	6.09937
IL33	-0.671179	3.73555	-5.18416	3.12888e-07	3.71524e-06	6.09742
LRRN1	0.874503	1.831	5.18368	3.13654e-07	3.71797e-06	6.09508
LBP	-0.870292	0.830963	-5.18183	3.1662e-07	3.74671e-06	6.08606
AQP4	-1.02916	3.84489	-5.18116	3.17698e-07	3.75626e-06	6.08281
ALDH1A3	0.664616	2.71583	5.17824	3.22471e-07	3.8062e-06	6.06852
PEG10	1.19563	3.01246	5.17062	3.35212e-07	3.95321e-06	6.03141
SCG5	0.863381	2.60366	5.16403	3.46628e-07	4.07744e-06	5.99933
CDH11	0.618166	3.95868	5.16087	3.52232e-07	4.13284e-06	5.98397
TRIM2	0.601865	4.26929	5.15971	3.54328e-07	4.15391e-06	5.97829
KIF4A	0.527435	2.51488	5.15378	3.65145e-07	4.26629e-06	5.9495
MFAP2	0.629768	3.8656	5.15071	3.70869e-07	4.32586e-06	5.9346
PDZD2	-0.553602	1.88125	-5.14807	3.75876e-07	4.38058e-06	5.92176
EDNRA	0.537104	3.60524	5.14683	3.7824e-07	4.40074e-06	5.91576
SULF1	0.793595	4.70453	5.14642	3.79019e-07	4.4061e-06	5.91379
ARHGEF19	0.513797	4.01522	5.14433	3.83063e-07	4.44593e-06	5.90363
PLA2G1B	-0.98851	2.65435	-5.14043	3.90698e-07	4.52668e-06	5.88473
LAD1	-0.607273	5.98629	-5.13231	4.07078e-07	4.70073e-06	5.84541
INMT	-0.652	3.28641	-5.12858	4.1481e-07	4.77807e-06	5.8274
CLEC4A	0.549817	3.27404	5.12255	4.27639e-07	4.91359e-06	5.79824
HCLS1	0.519733	4.49741	5.12012	4.32914e-07	4.97008e-06	5.78651
RDH10	-0.746659	4.75417	-5.11818	4.37161e-07	5.01054e-06	5.77716
CSF2	0.772003	1.97696	5.1137	4.47146e-07	5.11652e-06	5.75555
CFD	-0.734943	4.66492	-5.11016	4.55202e-07	5.19582e-06	5.73846
SLC28A2	-0.795303	0.816808	-5.10954	4.56625e-07	5.20779e-06	5.73547
UCHL1	-1.25301	3.95005	-5.10617	4.64424e-07	5.29237e-06	5.71926
KCNA3	0.551146	1.89966	5.09945	4.80408e-07	5.45307e-06	5.68688
NPR1	-0.520353	2.31954	-5.09941	4.80494e-07	5.45307e-06	5.68671
ZFP36	-0.641501	7.19589	-5.09788	4.84199e-07	5.48613e-06	5.67936
WFDC3	0.876436	2.75073	5.09739	4.85397e-07	5.49522e-06	5.67699
RASD1	-1.06576	5.68752	-5.09713	4.86043e-07	5.49804e-06	5.67572
CTSK	0.638847	5.85607	5.09483	4.91687e-07	5.55734e-06	5.66468
TNFRSF9	0.514954	1.8209	5.094	4.93732e-07	5.57138e-06	5.6607
LAYN	0.509463	2.73245	5.09382	4.94177e-07	5.57186e-06	5.65984
TNFSF10	0.629387	5.95952	5.09026	5.03095e-07	5.64942e-06	5.64273
MAP7D2	0.767492	1.8888	5.085	5.16542e-07	5.78497e-06	5.61749
VCAN	0.716185	4.43821	5.07201	5.51281e-07	6.1457e-06	5.55522
EGF	-0.669242	1.83224	-5.06902	5.59603e-07	6.21846e-06	5.54089
PF4V1	0.512461	0.706135	5.06621	5.67517e-07	6.28623e-06	5.52746
PLA2G4E	-0.561094	1.02976	-5.06403	5.73719e-07	6.34229e-06	5.51706
NKX2-1	0.914387	6.07822	5.06395	5.73951e-07	6.34229e-06	5.51667
ACADL	-0.536772	1.28785	-5.06246	5.78236e-07	6.38024e-06	5.50956
MMP12	1.11823	4.18904	5.04824	6.20759e-07	6.78779e-06	5.44169
COX4I2	-0.534272	3.49206	-5.04399	6.34055e-07	6.91849e-06	5.42142
HLA-DPA1	0.622129	7.14699	5.04398	6.34082e-07	6.91849e-06	5.42138
APBA2	0.6666	2.33188	5.04331	6.36203e-07	6.93071e-06	5.41819
SLC44A5	-0.752576	1.86726	-5.04125	6.42776e-07	6.99077e-06	5.40836
NPTX2	0.812171	1.32066	5.03907	6.4977e-07	7.04528e-06	5.39801
KIF3C	0.51489	2.46477	5.03495	6.63227e-07	7.16875e-06	5.37841
FILIP1L	0.519973	3.91198	5.03047	6.78182e-07	7.30191e-06	5.35709
AGER	-0.967653	4.54184	-5.02895	6.83318e-07	7.3458e-06	5.34988
NNMT	-0.709125	6.0462	-5.02695	6.90131e-07	7.40754e-06	5.34039
CATSPER1	0.576611	1.43773	5.02633	6.92266e-07	7.42471e-06	5.33744
SCUBE3	0.709011	2.02003	5.02181	7.07965e-07	7.56381e-06	5.316
TFAP2D	0.749878	0.877836	5.01402	7.35877e-07	7.81982e-06	5.27904
BMP3	0.852842	2.65032	5.01264	7.4091e-07	7.8654e-06	5.27252
PDX1	-0.627881	0.565496	-5.01237	7.41917e-07	7.8654e-06	5.27122
IVL	1.11277	1.8382	5.01149	7.45158e-07	7.8882e-06	5.26706
CLDN18	-1.23232	3.08747	-5.00904	7.54228e-07	7.96596e-06	5.25549
PRRX1	0.530161	3.11525	5.00798	7.58202e-07	8.00183e-06	5.25047
COL1A2	0.733144	7.23521	5.00532	7.68255e-07	8.0956e-06	5.23788
PDK4	-0.740166	3.58305	-5.00346	7.75354e-07	8.158e-06	5.22909
MEX3A	0.717634	2.77854	4.99916	7.92024e-07	8.32075e-06	5.20876
KCTD14	0.631022	2.59283	4.98549	8.47327e-07	8.86144e-06	5.14426
FCER1G	0.535883	6.09611	4.98222	8.61101e-07	8.98515e-06	5.12885
HOXB3	0.612589	2.20455	4.97923	8.739e-07	9.0845e-06	5.11476
LAPTM5	0.539702	6.76215	4.95458	9.86515e-07	1.01617e-05	4.99896
POU3F2	0.708706	0.392518	4.94733	1.02221e-06	1.04769e-05	4.96501
TP63	0.779923	1.56261	4.9422	1.04821e-06	1.07117e-05	4.94103
FNDC5	0.522682	1.31791	4.93999	1.05963e-06	1.08125e-05	4.93068
G0S2	0.821836	5.02779	4.93832	1.06833e-06	1.08771e-05	4.92288
SAMD9L	0.572566	3.58323	4.93376	1.0924e-06	1.11141e-05	4.9016
CLEC3B	-0.680057	3.66445	-4.9262	1.13354e-06	1.14737e-05	4.8663
CST6	0.997287	4.53048	4.91115	1.21986e-06	1.22313e-05	4.79624
VEGFA	0.542384	4.90228	4.90793	1.23911e-06	1.2409e-05	4.78129
SYT12	0.86943	1.85602	4.90789	1.23937e-06	1.2409e-05	4.78109
SRPX2	0.752983	4.15611	4.90761	1.24104e-06	1.24167e-05	4.7798
TM4SF19	-0.548754	0.94064	-4.90607	1.25039e-06	1.24832e-05	4.77264
SCIN	0.840781	2.94588	4.90205	1.27509e-06	1.27023e-05	4.75397
ACSM3	-0.517933	1.6759	-4.90164	1.27764e-06	1.27185e-05	4.75207
C3	-0.790259	6.72909	-4.89859	1.29673e-06	1.28993e-05	4.73791
CHRNA1	0.50556	1.05785	4.89495	1.31988e-06	1.31015e-05	4.72102
PLA2G4F	-0.580386	2.1217	-4.8885	1.36181e-06	1.34886e-05	4.69118
SLCO2A1	0.6413	4.53109	4.88651	1.37508e-06	1.36006e-05	4.68193
S100A5	0.605623	1.32307	4.88567	1.38065e-06	1.36362e-05	4.67807
MYBL2	0.680361	3.99381	4.88384	1.39294e-06	1.3738e-05	4.66961
COL6A2	0.620506	6.33126	4.88255	1.40169e-06	1.38145e-05	4.66364
AGR3	-1.18261	5.39483	-4.87855	1.42915e-06	1.40751e-05	4.64513
STYK1	-0.556483	2.74363	-4.87447	1.45764e-06	1.4315e-05	4.62629
LSP1	0.51946	4.47489	4.87327	1.46612e-06	1.43882e-05	4.62076
SERPINA4	-0.812403	0.52146	-4.87127	1.48042e-06	1.45079e-05	4.6115
CDCA5	0.501374	2.77724	4.86872	1.49874e-06	1.46667e-05	4.59976
CDH2	0.723747	0.823578	4.86311	1.53998e-06	1.50066e-05	4.57387
IFI44L	0.748395	3.06253	4.86187	1.54919e-06	1.50646e-05	4.56819
FRMD6	0.525005	2.13823	4.85968	1.56564e-06	1.51881e-05	4.55811
KLF2	-0.532788	4.39406	-4.8574	1.58302e-06	1.53077e-05	4.54758
KREMEN2	0.518572	0.649652	4.85704	1.58573e-06	1.53232e-05	4.54595
SELENBP1	-0.680599	5.74113	-4.85294	1.61744e-06	1.55429e-05	4.52706
CDC20	0.55583	4.02982	4.84614	1.67128e-06	1.59937e-05	4.49583
HMGCS2	-0.778697	0.908405	-4.84184	1.70626e-06	1.6306e-05	4.47607
RAB26	-0.526466	1.62254	-4.84156	1.70854e-06	1.63165e-05	4.4748
AUTS2	0.615308	3.32003	4.83736	1.74345e-06	1.66041e-05	4.45551
SLC1A7	1.01353	2.01865	4.83468	1.76602e-06	1.67729e-05	4.44325
PTPRR	-0.507748	0.537636	-4.83389	1.77274e-06	1.68253e-05	4.43963
SLC16A11	-0.506272	1.68701	-4.83256	1.78416e-06	1.68877e-05	4.43351
PLXNB3	0.690119	2.47819	4.83255	1.7842e-06	1.68877e-05	4.43349
ELOVL3	-0.518456	1.0208	-4.82315	1.86655e-06	1.7595e-05	4.39047
ARL14	-0.893885	1.11133	-4.82215	1.87554e-06	1.76678e-05	4.38588
SORL1	0.572089	3.67576	4.81141	1.97461e-06	1.85507e-05	4.33681
AIF1	0.542041	5.05335	4.8051	2.03511e-06	1.90544e-05	4.30805
RASAL1	-0.587341	2.19474	-4.79766	2.10875e-06	1.96509e-05	4.27417
HTRA1	0.511119	5.56932	4.79729	2.11251e-06	1.96728e-05	4.27248
ADH1B	-0.77082	3.14746	-4.78983	2.18911e-06	2.03587e-05	4.23853
FZD2	0.530625	2.73123	4.78935	2.19409e-06	2.03914e-05	4.23637
RNF186	-0.641961	1.10646	-4.78123	2.28064e-06	2.10826e-05	4.1995
SDC2	0.510013	3.74158	4.78029	2.29086e-06	2.11629e-05	4.19525
FAM107A	-0.581744	2.26781	-4.77955	2.29897e-06	2.12207e-05	4.19188
MMP15	-0.51609	4.9364	-4.76222	2.49631e-06	2.2893e-05	4.11343
SFRP2	0.980158	5.6444	4.76061	2.51548e-06	2.30231e-05	4.10614
STK32A	0.624122	2.51504	4.75897	2.53518e-06	2.31728e-05	4.09871
TMSB4Y	-0.538456	0.80849	-4.75775	2.54991e-06	2.32651e-05	4.09319
HS3ST1	0.609629	2.97227	4.75002	2.64495e-06	2.39081e-05	4.05834
LRRC15	0.801375	2.40486	4.73221	2.8774e-06	2.57572e-05	3.97814
TNFAIP2	0.61096	5.28709	4.72573	2.96676e-06	2.65057e-05	3.94902
CD40	0.501901	4.49986	4.72455	2.9832e-06	2.66183e-05	3.94376
RSAD2	0.562675	3.18364	4.70876	3.21342e-06	2.83879e-05	3.873
TMTC1	-0.525647	1.24922	-4.70668	3.24504e-06	2.86411e-05	3.86368
GSTA4	-0.514265	4.18845	-4.70179	3.3204e-06	2.91796e-05	3.84183
MSMB	-1.65247	3.59376	-4.69918	3.36137e-06	2.95174e-05	3.83017
UGT8	0.747498	2.28731	4.69781	3.38298e-06	2.96321e-05	3.82407
S100A14	-0.831241	6.96029	-4.69509	3.4265e-06	2.99866e-05	3.8119
SOX2	1.09007	2.6535	4.69441	3.4375e-06	3.00221e-05	3.80886
C1QTNF3	0.562343	2.04775	4.69398	3.44442e-06	3.00563e-05	3.80694
GLB1L3	0.842749	1.46399	4.69042	3.50231e-06	3.05038e-05	3.79108
SERPINA3	-0.500134	0.139659	-4.68971	3.51393e-06	3.05666e-05	3.78793
EYA2	0.924846	2.53793	4.68793	3.54343e-06	3.0746e-05	3.77998
CPM	-0.703174	5.08396	-4.68313	3.62388e-06	3.13459e-05	3.75862
CDH17	-0.912883	1.42529	-4.68041	3.67044e-06	3.16498e-05	3.74648
SBK1	0.637973	3.30532	4.67947	3.68652e-06	3.1749e-05	3.74232
EPHB2	0.563553	2.53591	4.67825	3.7076e-06	3.19107e-05	3.73689
IBSP	0.673737	1.25485	4.674	3.78192e-06	3.24496e-05	3.71801
ATP2C2	-0.642763	3.27832	-4.67351	3.79073e-06	3.24849e-05	3.7158
AQP7	-0.556014	1.25809	-4.67164	3.82392e-06	3.27087e-05	3.70751
PTPRZ1	0.655613	0.777817	4.6674	3.9003e-06	3.32594e-05	3.6887
IFI44	0.663443	4.68004	4.66079	4.02254e-06	3.40919e-05	3.65935
LGALS4	-1.29131	2.1346	-4.65849	4.06578e-06	3.43743e-05	3.64918
IL1B	0.589569	2.29527	4.65816	4.0721e-06	3.43898e-05	3.6477
FCGBP	0.841764	3.15326	4.65128	4.2046e-06	3.52553e-05	3.61726
B4GALNT4	0.833585	1.88357	4.64327	4.36404e-06	3.64512e-05	3.58187
CD74	0.572019	10.0498	4.6416	4.39816e-06	3.66478e-05	3.57446
IL4I1	0.635229	3.90266	4.64037	4.42321e-06	3.68123e-05	3.56906
C1QC	0.599977	7.48084	4.62561	4.73666e-06	3.91622e-05	3.50398
THBS2	0.727167	4.80439	4.61685	4.93258e-06	4.05643e-05	3.46546
TMEM37	-0.555185	3.69871	-4.61331	5.01406e-06	4.1161e-05	3.4499
COCH	0.693562	1.21842	4.60068	5.31492e-06	4.34084e-05	3.39453
DCDC2	-0.61646	0.906354	-4.5997	5.33895e-06	4.357e-05	3.39024
CPB2	-0.872794	1.16886	-4.5926	5.51644e-06	4.49077e-05	3.35918
SLC6A20	0.64203	1.31853	4.5925	5.51907e-06	4.49077e-05	3.35872
EPS8L1	-0.5796	3.78002	-4.5906	5.56747e-06	4.52483e-05	3.35043
USH1C	-0.695968	0.846058	-4.59039	5.5729e-06	4.5266e-05	3.3495
ZFP42	-0.668011	0.568895	-4.58894	5.61012e-06	4.54882e-05	3.34318
CXCL10	0.837231	5.237	4.58302	5.76491e-06	4.64985e-05	3.31733
HLA-DRA	0.595877	10.278	4.58118	5.81402e-06	4.68128e-05	3.30927
KLC3	0.530465	1.76482	4.57413	6.00515e-06	4.79893e-05	3.27855
HSD17B2	-0.634944	0.37374	-4.57138	6.08145e-06	4.8543e-05	3.26657
MT1G	0.740213	2.68557	4.57054	6.10482e-06	4.87015e-05	3.26292
ITGAM	0.514811	3.49325	4.56907	6.1461e-06	4.89521e-05	3.25652
CYP3A5	-0.778526	1.34456	-4.56265	6.32941e-06	5.02041e-05	3.22862
TM4SF1	-0.595051	6.43413	-4.54864	6.74838e-06	5.3253e-05	3.16777
KDR	0.568253	4.18354	4.54453	6.87614e-06	5.41625e-05	3.14997
CPD	0.518427	5.04911	4.54443	6.87926e-06	5.41625e-05	3.14954
LCP1	0.53715	5.50547	4.54379	6.89941e-06	5.42902e-05	3.14676
ACMSD	-0.531546	0.76403	-4.54035	7.00838e-06	5.50851e-05	3.13189
SLC6A3	0.784584	1.24111	4.53153	7.2955e-06	5.70829e-05	3.09379
FCGR3A	0.600368	6.25893	4.52906	7.37805e-06	5.76637e-05	3.08311
DACT2	-0.903923	1.84716	-4.528	7.41382e-06	5.78481e-05	3.07852
CD53	0.512813	5.48916	4.522	7.61874e-06	5.93106e-05	3.05265
SLC14A2	-0.724458	0.788311	-4.51915	7.71815e-06	5.99162e-05	3.04035
ABCC3	-0.69662	5.23522	-4.51753	7.77509e-06	6.02569e-05	3.03338
PCOLCE	0.502647	4.66792	4.51607	7.82687e-06	6.06243e-05	3.02708
CD14	0.513931	6.52705	4.51198	7.97345e-06	6.16907e-05	3.00948
SFTPC	-1.57768	6.0285	-4.49067	8.78042e-06	6.75196e-05	2.91804
SPRR2D	0.945363	1.10432	4.48866	8.86055e-06	6.8098e-05	2.90943
SFN	-0.569004	7.03475	-4.47629	9.36908e-06	7.15697e-05	2.85652
ITIH2	-0.677311	0.40215	-4.46853	9.70194e-06	7.3706e-05	2.82342
TNFAIP6	0.539872	2.79203	4.46133	1.00213e-05	7.56854e-05	2.79273
COL3A1	0.703784	8.75996	4.45507	1.03067e-05	7.76194e-05	2.76612
GPRC5C	-0.606818	4.06387	-4.42539	1.17702e-05	8.7033e-05	2.64032
LGI3	-0.574637	1.11603	-4.42022	1.20451e-05	8.87344e-05	2.61845
LAMC3	-0.525651	2.45264	-4.41721	1.22073e-05	8.96907e-05	2.60579
CKM	0.550028	1.01433	4.41671	1.22346e-05	8.98436e-05	2.60367
PRRX2	0.717827	2.41824	4.41333	1.24205e-05	9.11604e-05	2.58939
FGL1	-1.28117	1.72086	-4.40858	1.26854e-05	9.29081e-05	2.56941
ANLN	0.540892	2.91808	4.40743	1.27505e-05	9.32367e-05	2.56457
COL12A1	0.749136	3.468	4.39355	1.35609e-05	9.83839e-05	2.50623
MMP9	0.740685	5.65511	4.39048	1.37471e-05	9.94743e-05	2.49332
GRP	0.792115	1.88675	4.37689	1.45992e-05	0.000104765	2.43641
PNMA3	0.512218	1.01242	4.37507	1.47174e-05	0.000105504	2.42878
GDPD3	-0.52329	2.58694	-4.3701	1.5044e-05	0.000107456	2.40801
CYBB	0.606823	5.17124	4.36614	1.53089e-05	0.000109067	2.39149
XK	-0.561653	1.32935	-4.35276	1.62382e-05	0.000115096	2.33575
RCN3	0.556853	4.74795	4.32729	1.81585e-05	0.000126762	2.23006
HK3	0.547048	3.16213	4.32396	1.84256e-05	0.000128432	2.21625
CDCA7	0.587217	2.78736	4.31385	1.92574e-05	0.000133358	2.17452
DNER	-0.667	1.02994	-4.3084	1.97214e-05	0.000136031	2.15202
AMIGO2	0.641859	4.24448	4.30839	1.97219e-05	0.000136031	2.15199
CRTAC1	-0.796589	3.2578	-4.29944	2.05067e-05	0.000140668	2.11512
APOBEC3B	0.652141	2.30164	4.29649	2.07716e-05	0.000141929	2.10299
SPOCK2	-0.504644	4.18372	-4.28967	2.13965e-05	0.000145624	2.07499
FOXJ1	0.774895	4.20972	4.28554	2.17839e-05	0.000147898	2.05804
SPINK2	0.603955	1.47109	4.28442	2.18899e-05	0.000148545	2.05345
FSTL4	-0.742743	1.8562	-4.28402	2.19286e-05	0.000148661	2.05179
FASN	-0.521845	5.26884	-4.28313	2.20135e-05	0.000148946	2.04814
GBP1	0.574977	4.71107	4.28276	2.20481e-05	0.00014904	2.04665
HPN	-0.714776	4.40093	-4.28208	2.21133e-05	0.000149402	2.04386
SP8	0.5644	0.347514	4.28175	2.21455e-05	0.000149547	2.04249
ADAM8	0.546191	4.71737	4.28151	2.21683e-05	0.000149609	2.04152
KCNE4	-0.688842	2.64584	-4.2813	2.21888e-05	0.00014962	2.04065
GPC6	0.565296	2.28086	4.28081	2.2236e-05	0.000149847	2.03864
CACNA1H	-0.519463	1.7515	-4.2799	2.23236e-05	0.000150233	2.03492
KCNK1	-0.626391	4.14245	-4.27816	2.24928e-05	0.000151156	2.02779
TIPARP	0.51221	4.20773	4.26877	2.34264e-05	0.00015667	1.98939
SUCNR1	0.556726	2.03236	4.2681	2.34943e-05	0.000157048	1.98665
ANTXR1	0.50244	4.58245	4.26531	2.37803e-05	0.000158501	1.97523
CCL2	0.545828	5.09139	4.26378	2.39376e-05	0.000159167	1.969
GLYATL2	0.575561	0.47415	4.26276	2.40441e-05	0.000159798	1.96481
HLA-DRB5	0.647798	8.15552	4.25491	2.4873e-05	0.000164283	1.93282
IFI27	0.715028	6.47763	4.25232	2.51524e-05	0.000165733	1.92227
SERPINF1	0.552532	5.64363	4.25096	2.53002e-05	0.000166628	1.91674
TNS4	-0.956308	2.41976	-4.24387	2.6085e-05	0.000171389	1.88791
ENTPD8	-0.569728	1.72252	-4.24119	2.63884e-05	0.000173055	1.87699
PPP1R1B	0.945534	3.64056	4.23816	2.67338e-05	0.000174988	1.86472
ZBTB16	-0.530328	1.46499	-4.23801	2.67511e-05	0.000175019	1.86411
PTHLH	0.66402	1.70482	4.23562	2.7028e-05	0.000176594	1.8544
COL6A3	0.561886	5.5738	4.23518	2.70792e-05	0.000176831	1.85261
MYBPH	0.779885	1.34352	4.22929	2.77737e-05	0.000181196	1.82871
FOS	-0.629537	6.63279	-4.22372	2.84455e-05	0.000184771	1.80617
OLFML3	0.536478	4.62232	4.22364	2.84551e-05	0.000184771	1.80585
TNNC1	-0.630051	2.97793	-4.22141	2.87278e-05	0.00018628	1.79685
NMNAT2	0.746009	1.91853	4.22077	2.88068e-05	0.000186705	1.79426
RAB27B	-0.623447	3.28667	-4.21578	2.94299e-05	0.00019021	1.77407
AQP3	-0.833858	7.13771	-4.20632	3.06455e-05	0.000197147	1.7359
ENPP3	0.761564	1.64152	4.20266	3.11278e-05	0.000199508	1.72118
EDN2	0.804488	2.44455	4.19889	3.16328e-05	0.000202278	1.706
LCN2	-0.986645	6.48909	-4.19398	3.23023e-05	0.000206178	1.68625
GAS2	-0.500264	0.741632	-4.1935	3.23687e-05	0.000206412	1.68432
FADS2	0.538707	3.64721	4.18901	3.29941e-05	0.000209917	1.66628
MDK	0.596729	6.80845	4.1879	3.31513e-05	0.00021082	1.6618
MXRA8	0.513703	5.62407	4.18567	3.34669e-05	0.000212146	1.65287
TSPAN1	-0.81014	5.58058	-4.17861	3.44877e-05	0.000218118	1.62455
DUOX2	-0.599456	1.30593	-4.16166	3.70583e-05	0.000231522	1.55681
GUCY1B2	-0.514931	1.4671	-4.15409	3.82657e-05	0.000238528	1.5266
TMEM158	0.501787	1.65289	4.15318	3.84128e-05	0.00023923	1.52299
PLEKHA6	-0.530386	3.54734	-4.15143	3.86977e-05	0.000240643	1.51602
PIK3C2G	-0.526776	0.586833	-4.1514	3.87031e-05	0.000240643	1.51589
GAL3ST1	-0.560201	1.81256	-4.15	3.89324e-05	0.000241922	1.51033
KRT6A	-1.22999	2.38634	-4.13685	4.11548e-05	0.000254363	1.45805
GEM	-0.573485	4.5764	-4.12768	4.27745e-05	0.000263083	1.4217
EREG	1.01191	1.5677	4.11948	4.42753e-05	0.00027123	1.38924
CHIA	-0.778776	2.05428	-4.1161	4.49086e-05	0.000274867	1.37588
CILP2	0.578942	2.32515	4.11524	4.50692e-05	0.000275709	1.37252
VSTM2L	0.862652	5.31186	4.09286	4.94965e-05	0.00029897	1.28435
C1QB	0.549963	7.81225	4.08866	5.03716e-05	0.00030361	1.26786
IGF2BP2	0.586956	2.86002	4.07578	5.31498e-05	0.000317593	1.21737
ANPEP	0.664829	3.43904	4.07161	5.40801e-05	0.000322595	1.20106
CD38	-0.547225	2.60278	-4.07145	5.4117e-05	0.00032261	1.20042
STAC	0.506346	1.75248	4.06465	5.5668e-05	0.000330219	1.17385
C1QA	0.509546	7.87746	4.05826	5.71642e-05	0.000337649	1.14892
NTS	-1.07755	0.296707	-4.05491	5.79621e-05	0.000341488	1.13589
APLP1	0.609925	2.15503	4.05118	5.88658e-05	0.000345637	1.12135
SLC5A1	0.686381	1.54412	4.04323	6.08347e-05	0.00035554	1.09043
NOTUM	-0.727113	1.46675	-4.03262	6.35589e-05	0.000370524	1.04928
S100B	0.639734	2.73628	4.02709	6.50252e-05	0.000378276	1.02786
SLITRK6	0.838709	2.32454	4.01462	6.8449e-05	0.000394714	0.979665
CCL13	0.739955	4.8131	4.01241	6.90711e-05	0.00039797	0.97117
DNALI1	0.591733	3.79167	4.01065	6.95738e-05	0.000400534	0.964361
SYTL5	-0.51874	1.30366	-4.01011	6.97273e-05	0.000401251	0.962292
PTPRN2	-0.640271	2.39532	-4.00714	7.05836e-05	0.000405841	0.950834
KLHDC7B	0.529432	2.36734	4.00214	7.20451e-05	0.000412362	0.931594
HOXD1	0.646399	1.88644	3.99328	7.47084e-05	0.000425847	0.897523
AEBP1	0.519534	6.41505	3.98642	7.68329e-05	0.000435806	0.87121
MNDA	0.507554	4.23275	3.98139	7.84272e-05	0.000443216	0.851939
GABRE	0.587099	2.22307	3.97241	8.13513e-05	0.000456761	0.817598
CAV1	-0.612647	4.63105	-3.97197	8.1495e-05	0.000457382	0.815943
CD207	0.769526	2.38427	3.96555	8.36551e-05	0.000468178	0.791407
B4GALNT3	0.504629	3.96592	3.95982	8.56236e-05	0.000477611	0.769595
VCAM1	0.51421	3.62849	3.95511	8.72789e-05	0.000484545	0.751641
FABP3	0.644787	4.05287	3.95367	8.77889e-05	0.000486597	0.746178
CD55	-0.524024	6.53557	-3.95325	8.79383e-05	0.000487229	0.744584
NDP	0.502701	0.25375	3.95074	8.88402e-05	0.000491049	0.735017
PDE3A	-0.567604	1.71109	-3.93634	9.41718e-05	0.000517628	0.680388
CAPN6	-0.711905	1.15926	-3.92329	9.92646e-05	0.000541539	0.631037
CCL7	0.542758	1.62146	3.92233	9.96499e-05	0.000543	0.627408
CEACAM7	-0.632108	1.39983	-3.9021	0.000108094	0.000582824	0.551228
TFPI2	1.1749	3.51781	3.89707	0.000110298	0.000592175	0.532326
CYP4B1	-0.902365	4.54254	-3.89547	0.000111009	0.000595134	0.526312
FEZF1	0.588309	1.33577	3.89076	0.000113121	0.000605221	0.508668
HLA-DQA1	0.536909	5.7001	3.88241	0.000116963	0.00062337	0.477405
ITGA2	0.599738	4.02711	3.86439	0.000125674	0.000660397	0.410196
CCL28	0.526579	2.0368	3.86321	0.000126266	0.000663006	0.405798
COMP	0.820998	4.11217	3.86228	0.000126733	0.000664955	0.402345
KRT15	0.754785	3.09108	3.86042	0.000127674	0.000669128	0.395431
LRRK2	-0.619344	3.39564	-3.85408	0.000130934	0.000684659	0.371851
ISG15	0.592209	6.41999	3.84882	0.000133693	0.000696986	0.352346
POSTN	0.583567	5.92678	3.82398	0.0001475	0.000757566	0.260479
MMP3	0.545111	0.589341	3.82158	0.000148904	0.000763641	0.251632
TNNT1	0.911249	2.53929	3.81312	0.000153946	0.000786298	0.220521
COL5A1	0.530023	5.0151	3.80208	0.000160772	0.000816948	0.179997
KRT17	-0.963053	4.14968	-3.78649	0.0001709	0.000858653	0.122958
CALML5	0.741726	0.417909	3.78064	0.000174855	0.000874714	0.101608
SCNN1A	-0.531099	6.23817	-3.77469	0.000178967	0.000891748	0.0799106
COL5A2	0.515544	5.132	3.76955	0.00018259	0.000906213	0.0612129
GGH	-0.509037	3.03325	-3.76726	0.000184226	0.000913351	0.0528918
ZNF486	0.600451	2.53337	3.75373	0.000194182	0.000958257	0.00379462

## Sheet: A-C
gene	logFC	AveExpr	t	P.Value	adj.P.Val	B
SLC7A11	-2.72653	2.31484	-19.9273	7.82856e-66	1.0848e-61	138.816
INSL4	-3.06137	0.431495	-19.4002	2.91462e-63	2.0194e-59	132.971
S100P	-4.98006	5.55909	-18.8012	2.36539e-60	1.09257e-56	126.356
CARD14	-1.86716	1.60655	-16.9156	2.56284e-51	8.87834e-48	105.807
ABCC2	-2.77863	0.741895	-16.3825	8.28396e-49	2.29582e-45	100.099
SRXN1	-1.83082	1.7196	-16.3552	1.11184e-48	2.56779e-45	99.8087
UGDH	-1.7891	5.14833	-15.7377	8.32914e-46	1.64881e-42	93.2703
PGD	-1.49293	6.34392	-15.5818	4.36789e-45	7.56572e-42	91.6334
PPP2R2C	-2.20072	1.08148	-14.9874	2.29602e-42	3.53511e-39	85.4454
KYNU	-2.01698	1.3764	-14.858	8.87524e-42	1.22984e-38	84.1099
TLR2	1.61544	4.58806	14.6403	8.538e-41	1.07556e-37	81.874
HTATIP2	-1.0139	4.95816	-14.6096	1.17252e-40	1.35397e-37	81.5607
UCK2	-1.52786	2.65479	-14.3932	1.09584e-39	1.16808e-36	79.3534
TXNRD1	-2.08982	5.41157	-14.3285	2.13366e-39	2.11187e-36	78.6954
HGD	-2.77161	2.51435	-14.1887	8.94632e-39	8.26461e-36	77.2798
GCLC	-2.20643	3.68164	-13.986	7.07542e-38	6.12775e-35	75.2377
AKR1C3	-2.99073	4.19097	-13.92	1.38354e-37	1.12775e-34	74.5755
HLF	1.84483	1.9684	13.9113	1.51168e-37	1.16374e-34	74.488
MAP3K3	0.749114	3.61941	13.8286	3.49309e-37	2.54756e-34	73.661
CABYR	-2.35787	2.2514	-13.7325	9.22569e-37	6.39202e-34	72.702
AKR1C1	-3.55231	3.08824	-13.7258	9.8709e-37	6.51338e-34	72.6353
ANKRD44	0.947676	2.16648	13.5231	7.57413e-36	4.77067e-33	70.6234
GPX2	-4.25056	3.81954	-13.4304	1.91447e-35	1.15343e-32	69.7079
TSKU	-1.44649	4.48981	-13.3869	2.9563e-35	1.70689e-32	69.2789
GGA2	0.664094	4.45851	13.253	1.11998e-34	6.20781e-32	67.964
PBK	-1.64664	2.03311	-13.191	2.07043e-34	1.10346e-31	67.3575
GCLM	-1.42448	3.61356	-13.1835	2.22903e-34	1.14399e-31	67.2846
PRC1	-1.18631	2.92391	-13.1543	2.9767e-34	1.47315e-31	66.9991
AKR1B10	-4.14058	2.39545	-13.0485	8.45701e-34	4.04099e-31	65.9684
RGL1	1.12845	4.00514	13.0312	1.00266e-33	4.6313e-31	65.8003
OIP5	-1.31243	1.56961	-13.0044	1.30467e-33	5.83187e-31	65.5404
TALDO1	-1.00962	6.43658	-12.9569	2.08078e-33	8.84109e-31	65.0797
PTPN13	1.8348	3.31426	12.9557	2.10548e-33	8.84109e-31	65.068
DPYSL2	1.17603	4.81562	12.9281	2.75869e-33	1.12433e-30	64.8013
CDCA3	-1.13795	1.90459	-12.8881	4.08426e-33	1.61702e-30	64.414
ABCB6	-1.19234	2.05809	-12.8754	4.62521e-33	1.78032e-30	64.2913
MAMDC2	1.56133	2.19119	12.8055	9.15427e-33	3.4284e-30	63.6175
CBX2	-1.54848	2.31895	-12.7886	1.07971e-32	3.93725e-30	63.4546
GPC4	1.55914	5.0805	12.7812	1.16033e-32	4.12275e-30	63.3835
AIFM2	-0.967597	3.43622	-12.7371	1.78252e-32	6.17511e-30	62.9598
MEF2C	1.07712	2.79878	12.7201	2.10297e-32	7.10753e-30	62.7966
PSMD14	-0.70491	3.82212	-12.693	2.73719e-32	9.03076e-30	62.5365
PLK1	-1.18555	2.85485	-12.6631	3.65912e-32	1.17917e-29	62.25
OSGIN1	-1.77775	3.03812	-12.5976	6.9025e-32	2.17382e-29	61.6237
IFT57	1.32892	4.96474	12.5927	7.23492e-32	2.20573e-29	61.5773
RCCD1	-0.79223	2.31193	-12.5915	7.3222e-32	2.20573e-29	61.5655
CENPO	-0.794098	2.24996	-12.575	8.58984e-32	2.53254e-29	61.4079
NEK2	-1.37274	2.52691	-12.5415	1.18733e-31	3.42767e-29	61.0885
CYP4F11	-2.22648	1.57687	-12.5168	1.50676e-31	4.26104e-29	60.8534
CX3CL1	1.89249	4.43346	12.4894	1.96166e-31	5.43656e-29	60.593
TRIM22	1.22767	4.64775	12.4657	2.46513e-31	6.69791e-29	60.3676
ATP13A4	2.07519	3.17579	12.4459	2.98231e-31	7.94728e-29	60.1797
SNX25	1.06672	3.62328	12.4016	4.56409e-31	1.1823e-28	59.7598
PKD1L2	-0.884377	0.501696	-12.4006	4.60737e-31	1.1823e-28	59.7505
FOXM1	-1.38113	3.05213	-12.3983	4.70936e-31	1.1865e-28	59.7289
HLA-DPB1	1.47005	7.80844	12.32	9.97096e-31	2.46728e-28	58.9888
G6PD	-1.59573	5.31541	-12.2945	1.27249e-30	3.09349e-28	58.7482
EXO1	-1.20701	1.73738	-12.2767	1.50804e-30	3.60292e-28	58.5806
SRGAP1	-0.803266	1.27822	-12.2482	1.97988e-30	4.65004e-28	58.312
SNRPA1	-0.674626	3.60239	-12.2401	2.13962e-30	4.94145e-28	58.2355
GSR	-1.20286	5.32162	-12.2208	2.5719e-30	5.84244e-28	58.0539
ARHGAP11A	-1.08045	1.95439	-12.142	5.43614e-30	1.21498e-27	57.3156
KIAA0319	-1.5102	1.22563	-12.111	7.3002e-30	1.6057e-27	57.0247
CD83	1.16937	4.28075	12.0879	9.07935e-30	1.96582e-27	56.8096
BLM	-0.904574	1.53991	-12.0756	1.02076e-29	2.17611e-27	56.694
ADH1B	1.97321	3.14746	12.0402	1.42546e-29	2.99281e-27	56.3646
KCNK5	1.59351	4.44334	11.9994	2.0954e-29	4.33373e-27	55.9846
ARHGAP20	1.2335	1.71989	11.9758	2.61894e-29	5.33687e-27	55.7646
SHROOM4	1.04431	2.34184	11.9725	2.69953e-29	5.42136e-27	55.7347
HLA-DPA1	1.50261	7.14699	11.9628	2.95805e-29	5.85568e-27	55.6445
NQO1	-2.0394	5.72405	-11.9515	3.28939e-29	6.41986e-27	55.5398
LTBR	-0.824762	5.2328	-11.9042	5.13408e-29	9.88096e-27	55.1007
CENPA	-1.29952	2.08366	-11.9001	5.33408e-29	1.01253e-26	55.063
INHA	-2.40427	1.43402	-11.8953	5.57876e-29	1.04466e-26	55.0187
PUS1	-0.768476	2.98618	-11.8873	6.01452e-29	1.11124e-26	54.9445
BCAN	-0.920901	0.784201	-11.869	7.14023e-29	1.30187e-26	54.7753
KIF23	-1.09908	2.03074	-11.7797	1.64569e-28	2.9616e-26	53.9518
OPN3	-1.44071	3.02012	-11.7777	1.67739e-28	2.97995e-26	53.933
CCNB2	-1.18322	2.96075	-11.7316	2.57785e-28	4.52169e-26	53.5092
BUB1B	-1.16026	2.21048	-11.7283	2.65884e-28	4.60544e-26	53.4787
NFIX	1.22642	4.09992	11.7118	3.09927e-28	5.30204e-26	53.3275
CPS1	-3.36301	1.25959	-11.7022	3.38818e-28	5.72561e-26	53.2396
COLEC12	1.49989	2.9055	11.6557	5.21807e-28	8.71167e-26	52.8138
FGA	-3.74078	2.76364	-11.6143	7.65995e-28	1.26362e-25	52.4353
FXYD4	-2.12739	1.47452	-11.6063	8.25059e-28	1.34504e-25	52.362
TXN	-0.944222	7.143	-11.5939	9.25692e-28	1.49155e-25	52.2485
SUSD2	2.19127	4.77583	11.5921	9.40944e-28	1.4987e-25	52.2324
SPC25	-1.12791	1.7573	-11.5769	1.08283e-27	1.70509e-25	52.0939
RAD51	-1.02794	1.80785	-11.5678	1.17737e-27	1.83312e-25	52.0114
CAMK1D	1.38469	3.64316	11.5602	1.26311e-27	1.94476e-25	51.9421
RNF175	0.759944	0.568048	11.5558	1.31611e-27	1.98232e-25	51.9015
ADRB2	1.20552	1.91629	11.5531	1.34939e-27	2.01059e-25	51.8769
CTSH	1.51847	6.5541	11.5512	1.373e-27	2.02401e-25	51.8598
CCDC77	-0.715415	2.26401	-11.5141	1.93328e-27	2.80316e-25	51.5224
NUF2	-1.31603	2.19911	-11.5136	1.942e-27	2.80316e-25	51.5179
NR0B1	-2.52995	0.23231	-11.5081	2.04316e-27	2.91877e-25	51.4679
ZNF608	0.95697	2.52805	11.4876	2.468e-27	3.4897e-25	51.2816
CD1C	1.59383	2.51477	11.4608	3.15785e-27	4.42003e-25	51.0386
MTHFD2	-1.00987	4.22125	-11.3743	6.97483e-27	9.66503e-25	50.2574
RHOV	-2.10284	3.75715	-11.3614	7.84874e-27	1.07683e-24	50.141
ARHGDIB	1.05556	6.82015	11.35	8.71533e-27	1.184e-24	50.0377
SCARB1	-0.995774	3.10512	-11.3316	1.03115e-26	1.38725e-24	49.8719
AKR1C4	-1.41587	0.637563	-11.3293	1.05264e-26	1.40254e-24	49.8516
TROAP	-1.22706	2.42983	-11.327	1.07544e-26	1.41927e-24	49.8305
HIP1	0.9796	4.02584	11.3208	1.13729e-26	1.48674e-24	49.7754
CHRDL1	1.58422	2.84689	11.3171	1.17649e-26	1.51092e-24	49.742
PIR	-1.4188	3.15368	-11.317	1.1776e-26	1.51092e-24	49.741
AURKA	-1.16323	3.15277	-11.2963	1.4218e-26	1.80752e-24	49.5553
HAL	-1.64604	1.57299	-11.2334	2.52145e-26	3.17634e-24	48.9905
FANCI	-0.91605	2.55565	-11.222	2.79565e-26	3.49003e-24	48.8888
VDAC2	-0.613165	4.70129	-11.2152	2.97444e-26	3.68008e-24	48.8277
GTSE1	-1.00513	2.12429	-11.1839	3.94778e-26	4.84109e-24	48.5486
SLC16A14	-2.01175	2.80722	-11.1744	4.30496e-26	5.23279e-24	48.4633
CEP55	-1.24561	3.01594	-11.1618	4.82342e-26	5.81201e-24	48.3512
GAPDH	-0.969422	8.81612	-11.1532	5.21635e-26	6.2313e-24	48.274
CENPN	-0.898277	2.14703	-11.1176	7.19075e-26	8.51643e-24	47.9576
HLA-DMA	1.21627	6.69541	11.0812	9.98584e-26	1.17072e-23	47.634
DUSP4	-1.86484	3.6767	-11.0805	1.00538e-25	1.17072e-23	47.6273
ICAM1	1.49538	6.5992	11.0393	1.4559e-25	1.6812e-23	47.2624
RASSF5	0.808689	3.6049	11.0381	1.47259e-25	1.68642e-23	47.2512
NCAPG	-1.1582	1.98891	-11.0301	1.58139e-25	1.79618e-23	47.1809
NMB	-1.25721	3.7071	-11.0197	1.73626e-25	1.94071e-23	47.0888
CCNB1	-1.12948	3.7974	-11.019	1.74736e-25	1.94071e-23	47.0826
INPP5B	0.644169	2.58863	11.0188	1.75066e-25	1.94071e-23	47.0807
CD74	1.38189	10.0498	11.0109	1.87896e-25	2.0664e-23	47.011
DARS2	-0.761513	3.70194	-11.0087	1.91635e-25	2.09093e-23	46.9916
GTPBP4	-0.721834	3.83348	-10.9677	2.76766e-25	2.9962e-23	46.6294
ESPL1	-0.997668	1.78832	-10.9495	3.25731e-25	3.49896e-23	46.4688
TMPRSS2	1.65852	4.93522	10.9426	3.46426e-25	3.69264e-23	46.4081
CD207	2.1619	2.38427	10.9398	3.55236e-25	3.75764e-23	46.3834
FAM83D	-1.19164	2.6794	-10.9344	3.72833e-25	3.9139e-23	46.3357
EHBP1	-0.6477	3.05833	-10.9137	4.48658e-25	4.67448e-23	46.1533
SLC3A2	-0.703667	5.26767	-10.895	5.30018e-25	5.48094e-23	45.9891
KIF14	-1.01202	1.30863	-10.8936	5.36761e-25	5.50955e-23	45.9767
CD1E	1.38755	1.6034	10.8834	5.87551e-25	5.98654e-23	45.8876
NPC2	1.26168	7.7184	10.8665	6.83113e-25	6.90941e-23	45.7391
BTN2A2	0.642095	2.91935	10.862	7.1116e-25	7.14097e-23	45.6994
SLC34A2	2.19066	8.36151	10.8564	7.47431e-25	7.45119e-23	45.6504
GGH	-1.48436	3.03325	-10.7872	1.3823e-24	1.36818e-22	45.0446
GNPNAT1	-0.841473	3.78458	-10.7853	1.40589e-24	1.38166e-22	45.028
SCN7A	1.16172	2.12127	10.7774	1.50747e-24	1.46743e-22	44.9592
PIK3IP1	0.843826	4.66279	10.7769	1.51434e-24	1.46743e-22	44.9548
KCTD12	1.10179	4.91557	10.7748	1.54264e-24	1.48447e-22	44.9365
ZNF540	0.633522	1.12995	10.7676	1.64487e-24	1.57193e-22	44.8733
ZNF441	0.568192	1.66003	10.7634	1.70599e-24	1.61917e-22	44.8374
SPRED1	0.846584	3.87129	10.7533	1.86527e-24	1.75831e-22	44.7494
FURIN	-1.25841	6.24309	-10.7345	2.20339e-24	2.06299e-22	44.5853
ZNF493	0.702947	1.40115	10.7296	2.30166e-24	2.14054e-22	44.5423
CDC6	-1.14122	2.36556	-10.7282	2.33005e-24	2.14799e-22	44.5302
RBMS3	0.9235	2.10357	10.7277	2.34067e-24	2.14799e-22	44.5258
BRI3BP	-0.770078	3.1431	-10.7263	2.3688e-24	2.15951e-22	44.514
NOD1	0.802388	3.09472	10.7225	2.44939e-24	2.21838e-22	44.481
CDKL2	1.45986	2.88435	10.7205	2.49458e-24	2.24464e-22	44.463
ZNF462	0.975105	2.16544	10.7172	2.56785e-24	2.29566e-22	44.4345
PRDX1	-0.87421	7.55467	-10.6989	3.01754e-24	2.68039e-22	44.2755
MS4A2	1.09411	1.69507	10.6935	3.16341e-24	2.79206e-22	44.229
SPAG5	-1.04704	2.84815	-10.6846	3.42383e-24	3.00279e-22	44.1511
SCTR	1.9149	3.11167	10.6722	3.81754e-24	3.32702e-22	44.0439
KIF4A	-1.11139	2.51488	-10.6639	4.10726e-24	3.515e-22	43.9718
HOXD1	1.75789	1.88644	10.6638	4.10933e-24	3.515e-22	43.9713
CPLX2	-2.00024	0.704237	-10.661	4.21355e-24	3.58203e-22	43.9467
HLA-DOA	1.35934	4.67198	10.6592	4.28141e-24	3.61753e-22	43.9309
CYP2U1	0.63439	1.97997	10.6563	4.38941e-24	3.6863e-22	43.9064
GLB1L3	1.94761	1.46399	10.6441	4.88779e-24	4.08012e-22	43.8004
SMURF2	0.778554	3.89027	10.643	4.93573e-24	4.09547e-22	43.7908
ACOXL	1.00085	1.43635	10.6259	5.7368e-24	4.73183e-22	43.6427
ASPM	-1.04269	1.6743	-10.6242	5.82329e-24	4.77475e-22	43.6279
IDH1	-0.799601	5.46607	-10.6115	6.50799e-24	5.30478e-22	43.5184
FCER1A	1.85163	2.90284	10.6082	6.6997e-24	5.42911e-22	43.4898
COL21A1	1.27723	1.90821	10.6068	6.78066e-24	5.46277e-22	43.478
RASGRF1	1.36122	1.61461	10.6023	7.05705e-24	5.65258e-22	43.4387
FGF12	-1.11849	0.607542	-10.5791	8.64505e-24	6.88474e-22	43.2388
CDKN3	-1.20385	2.47755	-10.5782	8.71619e-24	6.90173e-22	43.2307
CIRBP	0.786372	5.42505	10.5758	8.8988e-24	7.00629e-22	43.2103
HLA-DRB5	1.63915	8.15552	10.5721	9.19082e-24	7.19532e-22	43.1785
ZFP36L1	0.935569	6.7628	10.5712	9.26894e-24	7.21571e-22	43.1701
CLEC4F	0.677587	0.675112	10.5697	9.38476e-24	7.26506e-22	43.1579
C7	1.81609	4.41324	10.5683	9.50166e-24	7.31469e-22	43.1457
KRT83	-1.01382	0.446361	-10.5589	1.03157e-23	7.86857e-22	43.0647
KIF11	-0.974484	2.80823	-10.5587	1.03347e-23	7.86857e-22	43.0629
BAG2	-1.08289	2.15041	-10.5518	1.0977e-23	8.31191e-22	43.0035
ACSL3	-0.66881	4.27726	-10.5439	1.17601e-23	8.85649e-22	42.9357
ECE2	-0.862642	2.14488	-10.5419	1.19747e-23	8.9694e-22	42.9179
KIF2C	-1.14069	2.85336	-10.541	1.20638e-23	8.98756e-22	42.9106
FUCA2	-0.618083	5.08229	-10.5385	1.2328e-23	9.13522e-22	42.8892
ECT2	-1.02461	3.53518	-10.5364	1.25584e-23	9.25648e-22	42.871
KCNA3	1.15855	1.89966	10.526	1.37519e-23	1.00512e-21	42.7816
NUP37	-0.645093	3.03459	-10.5258	1.37817e-23	1.00512e-21	42.7794
PIK3R1	0.714875	3.0974	10.5157	1.50438e-23	1.09142e-21	42.6931
C1QTNF7	0.865811	1.26963	10.5147	1.51853e-23	1.09595e-21	42.6839
HLA-DMB	1.20437	5.68883	10.5097	1.5863e-23	1.13893e-21	42.6409
NDC80	-1.06074	2.12238	-10.4919	1.85123e-23	1.3223e-21	42.4888
MFAP4	1.57563	5.31141	10.4912	1.86251e-23	1.32353e-21	42.4828
ADAMTS8	1.07179	1.46081	10.4847	1.97157e-23	1.39388e-21	42.4268
GPR35	-1.35463	1.78529	-10.4781	2.0888e-23	1.46927e-21	42.3699
FCHSD2	0.502457	3.91411	10.472	2.20232e-23	1.54129e-21	42.3178
CDC20	-1.22101	4.02982	-10.4536	2.58357e-23	1.79902e-21	42.1606
CDCA5	-1.09595	2.77724	-10.4505	2.65529e-23	1.83972e-21	42.1336
PER3	1.03438	2.53223	10.4385	2.94653e-23	2.03135e-21	42.0311
ROS1	1.84688	3.68992	10.4276	3.23806e-23	2.22127e-21	41.9382
POPDC3	-1.58075	0.737528	-10.4189	3.49316e-23	2.38447e-21	41.8635
CDC25C	-0.920766	1.50673	-10.41	3.77475e-23	2.56405e-21	41.7872
BCAS1	-1.78369	1.95012	-10.4077	3.85072e-23	2.6029e-21	41.7676
UBE2T	-1.09575	4.07081	-10.3901	4.48202e-23	3.01492e-21	41.6181
FCGRT	0.778563	6.05737	10.3657	5.53624e-23	3.70607e-21	41.4101
ZWINT	-1.01171	3.7871	-10.349	6.3979e-23	4.26229e-21	41.2676
BIRC5	-1.26565	3.39049	-10.3484	6.43201e-23	4.26452e-21	41.2624
TNIK	1.13491	2.53599	10.3455	6.5908e-23	4.34898e-21	41.2384
HLA-DRA	1.36932	10.278	10.3376	7.05812e-23	4.63528e-21	41.1709
EMB	1.23904	4.48152	10.3353	7.20045e-23	4.70645e-21	41.1513
CYP24A1	-2.58858	3.42364	-10.3277	7.6915e-23	5.00381e-21	41.0863
LCA5	0.792076	1.95416	10.3121	8.79524e-23	5.69513e-21	40.9543
PGAM5	-0.653321	4.21949	-10.3051	9.3397e-23	6.00204e-21	40.8952
MGP	1.24845	6.52999	10.3049	9.35585e-23	6.00204e-21	40.8935
ZNF671	0.786431	2.07937	10.3013	9.65138e-23	6.16309e-21	40.8628
RAD54B	-0.583069	0.854094	-10.2932	1.03469e-22	6.57691e-21	40.7943
CIITA	1.06087	3.25077	10.2918	1.04744e-22	6.62756e-21	40.7823
UCHL1	-2.56739	3.95005	-10.2737	1.22387e-22	7.70872e-21	40.629
CCNA2	-1.06804	2.99871	-10.2681	1.28385e-22	8.04991e-21	40.5819
ESCO2	-0.836691	0.688481	-10.2671	1.29579e-22	8.08819e-21	40.5728
SLC7A5	-1.3175	4.69438	-10.2632	1.33913e-22	8.32122e-21	40.5404
HSPE1	-0.682067	5.50442	-10.2593	1.38544e-22	8.57058e-21	40.5069
AURKB	-1.12586	2.87124	-10.258	1.40104e-22	8.62852e-21	40.4959
CYSLTR1	0.955232	1.74862	10.257	1.41272e-22	8.66197e-21	40.4877
INMT	1.32785	3.28641	10.2563	1.42092e-22	8.67384e-21	40.482
ARHGEF6	0.824002	2.94	10.2447	1.56983e-22	9.54082e-21	40.3839
GPD1L	0.928611	4.24083	10.2279	1.81356e-22	1.0974e-20	40.2418
DPP4	1.96481	4.85939	10.2096	2.12223e-22	1.2786e-20	40.0871
AQP1	1.82455	6.84146	10.2025	2.25374e-22	1.34764e-20	40.0279
TPX2	-1.23492	3.78392	-10.2024	2.25628e-22	1.34764e-20	40.0268
DTYMK	-0.699558	4.12142	-10.1976	2.35187e-22	1.39871e-20	39.986
ST3GAL5	1.29894	4.43677	10.19	2.50982e-22	1.48626e-20	39.922
DEPDC1	-1.08047	1.45819	-10.1607	3.22334e-22	1.90067e-20	39.6757
TTK	-1.07589	1.66167	-10.1593	3.26011e-22	1.91421e-20	39.6645
CISH	1.04498	3.94045	10.1479	3.59418e-22	2.10146e-20	39.5685
LRRK2	1.65979	3.39564	10.1423	3.77027e-22	2.19515e-20	39.5214
LRP2BP	0.582157	1.10343	10.1409	3.81439e-22	2.21155e-20	39.5099
SPATS2	-0.623433	3.20354	-10.1403	3.83362e-22	2.21344e-20	39.505
WDR12	-0.583323	2.50659	-10.1369	3.94896e-22	2.27057e-20	39.4758
CACHD1	1.27194	2.53299	10.1324	4.10213e-22	2.34889e-20	39.4384
CKS1B	-0.916613	3.84809	-10.1296	4.20082e-22	2.39551e-20	39.415
SLC43A3	1.02176	4.40304	10.127	4.2962e-22	2.43985e-20	39.3929
NCAPH	-1.02799	2.55178	-10.1227	4.4542e-22	2.51926e-20	39.3573
CDC25A	-0.828898	1.49466	-10.1164	4.69939e-22	2.64713e-20	39.3046
NRG4	-0.730454	0.523715	-10.1157	4.72798e-22	2.65246e-20	39.2986
UGT1A6	-1.9158	1.13311	-10.1107	4.93395e-22	2.75684e-20	39.2566
C8orf76	-0.723446	2.87271	-10.0998	5.41484e-22	3.01339e-20	39.1651
BMP3	1.74862	2.65032	10.0922	5.77476e-22	3.20083e-20	39.1017
ME1	-1.18286	3.7757	-10.089	5.93308e-22	3.27549e-20	39.0751
PANX2	-1.37067	2.98559	-10.0872	6.02588e-22	3.31351e-20	39.0599
TFG	-0.533296	5.02957	-10.0776	6.53857e-22	3.58123e-20	38.9795
C1orf116	1.69483	5.7491	10.0721	6.85178e-22	3.73799e-20	38.9334
DPYD	1.10977	3.77287	10.0551	7.91061e-22	4.29872e-20	38.792
CBX7	0.76021	3.08237	10.0541	7.9807e-22	4.31081e-20	38.7833
ST6GALNAC6	0.663446	4.25262	10.0539	7.99508e-22	4.31081e-20	38.7816
PFN2	-1.44393	4.63656	-10.0144	1.11706e-21	5.99968e-20	38.4524
SPECC1	-0.776808	2.20404	-10.0081	1.17831e-21	6.30417e-20	38.3999
IL6ST	0.787119	4.94047	9.98607	1.41886e-21	7.56199e-20	38.217
NCAPG2	-0.798392	2.62378	-9.97174	1.60117e-21	8.5009e-20	38.0981
ST3GAL4	-0.862996	3.5552	-9.9529	1.87674e-21	9.92596e-20	37.9418
C1orf61	-1.00204	0.332293	-9.946	1.98889e-21	1.04791e-19	37.8847
AGMAT	-0.91514	1.46961	-9.94544	1.9984e-21	1.04893e-19	37.88
NDUFA9	-0.585886	2.70759	-9.93812	2.12525e-21	1.11131e-19	37.8194
RAD51AP1	-0.966752	2.20217	-9.93502	2.18152e-21	1.13644e-19	37.7937
VIM	1.00577	6.86668	9.93182	2.24089e-21	1.163e-19	37.7673
HMMR	-1.01941	2.15186	-9.92333	2.40672e-21	1.2444e-19	37.6971
RRM2	-1.15333	3.35309	-9.91008	2.69026e-21	1.385e-19	37.5875
FHL1	1.20317	2.94512	9.90971	2.69863e-21	1.385e-19	37.5844
CBR1	-1.43187	5.60867	-9.89699	3.00266e-21	1.53534e-19	37.4794
HDGF	-0.630252	6.82639	-9.89147	3.145e-21	1.60222e-19	37.4338
TGIF1	-0.66131	4.11214	-9.88734	3.25569e-21	1.65253e-19	37.3998
RAPGEF5	0.862413	3.37226	9.88134	3.42365e-21	1.73144e-19	37.3503
IRX2	2.10941	3.2178	9.87877	3.49829e-21	1.76276e-19	37.3291
EIF5A	-0.593607	6.7343	-9.86657	3.87466e-21	1.94533e-19	37.2285
MAGI3	0.884295	3.34071	9.84257	4.73644e-21	2.36942e-19	37.0309
MCM10	-1.0001	1.52649	-9.82438	5.51381e-21	2.74838e-19	36.8814
DLC1	1.15412	3.45181	9.81875	5.77926e-21	2.87037e-19	36.8352
EIF4A3	-0.55926	4.5766	-9.8037	6.55247e-21	3.24277e-19	36.7116
FGB	-3.6061	1.96187	-9.7943	7.08621e-21	3.49443e-19	36.6346
KIAA1549	-0.946208	1.934	-9.78501	7.65623e-21	3.76214e-19	36.5585
PKMYT1	-0.897865	2.07747	-9.77983	7.99417e-21	3.91432e-19	36.516
ETV1	1.10894	2.72264	9.76039	9.39737e-21	4.58519e-19	36.3569
ICAM5	1.24396	2.0832	9.75856	9.5413e-21	4.63908e-19	36.342
ERCC6L	-0.788363	1.17226	-9.75482	9.84225e-21	4.76867e-19	36.3114
KIFC1	-1.05265	3.261	-9.75382	9.92482e-21	4.79192e-19	36.3032
LYPD3	-1.70006	2.61209	-9.75285	1.00047e-20	4.81374e-19	36.2953
BZW1	-0.612568	4.54379	-9.75243	1.00398e-20	4.81389e-19	36.2919
PDSS1	-0.621143	2.30266	-9.74422	1.07482e-20	5.13022e-19	36.2248
SMUG1	-0.58262	3.60848	-9.74394	1.07736e-20	5.13022e-19	36.2225
CDK8	-0.502954	2.88184	-9.73504	1.15995e-20	5.49265e-19	36.1498
RFK	-0.751819	3.7933	-9.73489	1.1614e-20	5.49265e-19	36.1486
SPRY2	0.837444	3.82236	9.72802	1.22952e-20	5.79505e-19	36.0925
NUSAP1	-0.914802	3.49466	-9.71666	1.35102e-20	6.34613e-19	35.9998
GFRA1	0.818687	0.275967	9.71422	1.37864e-20	6.45398e-19	35.9799
ALG3	-0.608948	4.53215	-9.71348	1.38712e-20	6.47183e-19	35.9739
HLA-DQA1	1.3643	5.7001	9.68732	1.72255e-20	7.98306e-19	35.7609
CHML	-1.02868	3.00955	-9.68641	1.73552e-20	8.01635e-19	35.7535
STYK1	-1.12563	2.74363	-9.68203	1.79958e-20	8.28466e-19	35.7178
HEBP2	-0.634392	3.46026	-9.6756	1.89784e-20	8.70809e-19	35.6655
PTK7	0.885789	4.94837	9.66153	2.13175e-20	9.74907e-19	35.5512
ZNF439	0.677367	1.29384	9.65941	2.16928e-20	9.88807e-19	35.5341
PPM1M	0.598157	3.87107	9.64572	2.42875e-20	1.10345e-18	35.423
SLC12A8	-0.831478	3.19295	-9.64473	2.44869e-20	1.10887e-18	35.4149
ZFP2	0.514331	1.03144	9.63017	2.76097e-20	1.24621e-18	35.2969
KCNJ15	1.59729	3.30162	9.62955	2.77513e-20	1.24854e-18	35.2918
PIF1	-0.7529	1.23487	-9.62262	2.93807e-20	1.31757e-18	35.2357
EPN3	-1.11172	2.91148	-9.62149	2.96562e-20	1.32563e-18	35.2265
FCGBP	1.7729	3.15326	9.61965	3.01078e-20	1.34149e-18	35.2117
SHC3	0.956485	1.46908	9.60152	3.49535e-20	1.55241e-18	35.0649
TEAD4	-0.767813	3.16747	-9.59781	3.60349e-20	1.59532e-18	35.035
APBB1	0.774405	2.95743	9.59658	3.64028e-20	1.60648e-18	35.025
TMEM43	0.616328	5.45005	9.58791	3.90901e-20	1.71959e-18	34.9549
CACNB1	0.957684	2.51613	9.58155	4.11853e-20	1.80603e-18	34.9036
CTNNBIP1	0.688621	4.66996	9.57735	4.26289e-20	1.86343e-18	34.8697
BYSL	-0.64874	4.08996	-9.5617	4.84727e-20	2.11222e-18	34.7434
SLC1A7	2.03987	2.01865	9.55495	5.12266e-20	2.22523e-18	34.689
MELK	-1.08392	2.52845	-9.54688	5.47286e-20	2.36805e-18	34.624
GAB3	0.701749	2.02247	9.5466	5.48564e-20	2.36805e-18	34.6217
TRIM31	-1.47053	1.78648	-9.52756	6.41067e-20	2.75878e-18	34.4685
NFATC2	0.690218	2.56662	9.51513	7.09642e-20	3.04443e-18	34.3686
FLAD1	-0.59577	4.36799	-9.50817	7.5119e-20	3.21273e-18	34.3126
CHRNA5	-1.15446	1.32805	-9.50748	7.55424e-20	3.22089e-18	34.3071
CENPF	-1.04049	2.42316	-9.50401	7.77143e-20	3.29323e-18	34.2792
CD1A	1.78288	2.03974	9.50145	7.93583e-20	3.35265e-18	34.2586
GNG7	0.781063	2.1522	9.48588	9.01066e-20	3.79516e-18	34.1337
CBR3	-1.28203	3.18145	-9.48532	9.0517e-20	3.80089e-18	34.1293
GALNT10	0.870279	4.25972	9.45991	1.11343e-19	4.64722e-18	33.9257
IFNAR2	0.597443	3.71257	9.4494	1.21283e-19	5.04692e-18	33.8416
ZNF211	0.648771	2.85577	9.43654	1.3465e-19	5.56967e-18	33.7388
MKI67	-1.06135	2.8525	-9.43163	1.40135e-19	5.77931e-18	33.6996
FYN	0.760419	3.45371	9.42855	1.43681e-19	5.90131e-18	33.675
TEF	0.831385	3.41619	9.42832	1.43945e-19	5.90131e-18	33.6732
CCT3	-0.574568	6.37453	-9.41223	1.64033e-19	6.70505e-18	33.5448
MBIP	1.09999	5.01877	9.40868	1.68817e-19	6.88027e-18	33.5165
SYNPO	0.822136	4.42764	9.38419	2.05872e-19	8.3659e-18	33.3215
RAN	-0.55265	5.59341	-9.38264	2.08475e-19	8.44688e-18	33.3091
ITGA8	0.938265	2.40101	9.3646	2.41231e-19	9.69463e-18	33.1657
STRAP	-0.615294	5.63878	-9.36395	2.42498e-19	9.69463e-18	33.1605
CA12	-1.84419	2.45577	-9.36382	2.42768e-19	9.69463e-18	33.1594
AVEN	-0.60785	3.41751	-9.36174	2.46886e-19	9.83073e-18	33.1429
BTK	0.884176	2.58756	9.35532	2.60029e-19	1.03244e-17	33.0919
CD1B	1.03173	0.818821	9.3384	2.98075e-19	1.18012e-17	32.9577
CNN3	0.787364	6.05671	9.33702	3.0143e-19	1.19001e-17	32.9467
SLC27A4	-0.567718	4.23869	-9.31795	3.51518e-19	1.37986e-17	32.7956
SESN3	0.971206	3.38978	9.3176	3.52507e-19	1.37986e-17	32.7928
SAMHD1	0.831597	5.16082	9.31514	3.59577e-19	1.40356e-17	32.7733
TIMELESS	-0.710878	3.48578	-9.31404	3.62755e-19	1.41199e-17	32.7647
CPA3	1.55633	4.51729	9.31349	3.64362e-19	1.41269e-17	32.7603
PLD4	0.785791	1.45164	9.31329	3.64973e-19	1.41269e-17	32.7587
METTL7A	0.957339	4.53477	9.30718	3.83365e-19	1.47975e-17	32.7103
CTSO	0.74312	4.82555	9.30039	4.04899e-19	1.55852e-17	32.6566
MAD2L1	-1.00048	1.98814	-9.29926	4.08592e-19	1.56838e-17	32.6477
S100B	1.50245	2.73628	9.28719	4.50236e-19	1.71871e-17	32.5523
LMO3	1.70849	4.21061	9.28402	4.61847e-19	1.75819e-17	32.5273
GLS	1.19444	4.71023	9.27689	4.89079e-19	1.85676e-17	32.471
SPN	0.923576	2.75839	9.27512	4.96086e-19	1.87821e-17	32.457
CDT1	-0.968843	2.54422	-9.27106	5.12517e-19	1.93513e-17	32.425
BTBD9	0.769187	3.49696	9.26943	5.19279e-19	1.95016e-17	32.4121
TACC2	-1.02795	3.41937	-9.26942	5.1931e-19	1.95016e-17	32.412
ZNF708	0.515494	1.97507	9.25972	5.61344e-19	2.10231e-17	32.3356
TMEM17	-0.661173	1.90699	-9.2528	5.93403e-19	2.21024e-17	32.281
ABCA3	1.60519	5.19363	9.25256	5.94529e-19	2.21024e-17	32.2791
MTMR2	-0.511368	3.3777	-9.25247	5.94947e-19	2.21024e-17	32.2784
RPS6KA1	0.505665	4.7537	9.25183	5.98046e-19	2.21581e-17	32.2733
GLRX2	-0.53116	3.26039	-9.24911	6.11194e-19	2.25849e-17	32.2519
MIA2	-0.636882	1.49887	-9.24287	6.42548e-19	2.36803e-17	32.2028
LRP8	-0.876813	1.78831	-9.23423	6.88589e-19	2.53098e-17	32.1348
TACC3	-0.750343	3.60008	-9.22986	7.1309e-19	2.6141e-17	32.1004
PHLDB1	0.586035	2.75606	9.2295	7.15157e-19	2.61476e-17	32.0976
BACE1	0.63945	3.22411	9.22614	7.34642e-19	2.67893e-17	32.0712
CDCA8	-0.917113	3.17361	-9.2216	7.61815e-19	2.77073e-17	32.0355
ERLIN1	-0.528266	3.74793	-9.21641	7.94125e-19	2.88068e-17	31.9947
CENPE	-0.782672	1.3623	-9.21194	8.22979e-19	2.97605e-17	31.9596
FMO2	1.15132	3.46259	9.21055	8.32211e-19	2.99531e-17	31.9486
NUDT15	-0.551806	3.79038	-9.2067	8.58198e-19	3.06684e-17	31.9184
ALOX5AP	1.19005	5.28763	9.20662	8.58725e-19	3.06684e-17	31.9178
MTA3	-0.512455	2.94929	-9.20133	8.95805e-19	3.19105e-17	31.8763
DEPDC1B	-0.92026	1.59516	-9.19924	9.10916e-19	3.23655e-17	31.8598
TDG	-0.575344	3.21437	-9.19708	9.26756e-19	3.28441e-17	31.8429
POLQ	-0.696706	0.922024	-9.19203	9.64842e-19	3.3946e-17	31.8033
ALDH3A1	-2.22337	2.60605	-9.19199	9.65196e-19	3.3946e-17	31.8029
PTGER4	0.916907	2.77434	9.1897	9.83e-19	3.44847e-17	31.785
HMGA1	-0.97528	6.53493	-9.18854	9.92112e-19	3.47164e-17	31.7759
HSD17B6	1.55413	3.59861	9.18795	9.96788e-19	3.47922e-17	31.7713
RACGAP1	-0.806867	3.2291	-9.18679	1.00604e-18	3.50268e-17	31.7622
GCSH	-0.664724	1.92921	-9.18436	1.02572e-18	3.56227e-17	31.7432
SCN4B	0.861196	1.60766	9.16428	1.20378e-18	4.17021e-17	31.5859
HAS3	1.50418	3.20642	9.16354	1.21089e-18	4.18351e-17	31.5801
DNAJC10	-0.591447	3.61957	-9.16325	1.21366e-18	4.18351e-17	31.5779
ITGA9	0.944608	3.03044	9.15904	1.25507e-18	4.31551e-17	31.5449
NKX2-1	1.68258	6.07822	9.15018	1.34673e-18	4.61534e-17	31.4757
OTX1	-0.827647	1.70236	-9.14998	1.34893e-18	4.61534e-17	31.4741
SERPINB5	-1.98476	1.38866	-9.14933	1.35593e-18	4.62786e-17	31.469
CAPN3	0.640291	0.918049	9.1485	1.36492e-18	4.64709e-17	31.4625
MYOZ1	0.991322	1.64612	9.1442	1.41238e-18	4.79692e-17	31.4289
OGFRL1	0.7823	3.20066	9.14356	1.41954e-18	4.80944e-17	31.4239
B4GALNT2	-1.23554	0.871338	-9.14112	1.44741e-18	4.89188e-17	31.4048
SPARCL1	1.00904	6.7434	9.136	1.5075e-18	5.08259e-17	31.3649
HSPD1	-0.642861	6.09588	-9.12628	1.62851e-18	5.464e-17	31.289
SYNE1	0.788376	2.40906	9.12549	1.6388e-18	5.48524e-17	31.2828
ALDH3B2	-1.36627	2.4025	-9.12125	1.69494e-18	5.64586e-17	31.2497
EME1	-0.75599	1.52811	-9.11414	1.79322e-18	5.95891e-17	31.1943
RAB10	-0.509375	5.87473	-9.11328	1.80558e-18	5.98561e-17	31.1876
PIGR	2.53279	6.56149	9.10621	1.90963e-18	6.31545e-17	31.1326
B3GNT8	1.2912	4.13872	9.10145	1.98308e-18	6.54276e-17	31.0955
CHAC1	-0.865224	2.38772	-9.09964	2.01171e-18	6.62145e-17	31.0814
LY86	1.0251	3.76878	9.09841	2.0314e-18	6.66622e-17	31.0718
RNASE6	0.915972	4.46918	9.0982	2.03494e-18	6.66622e-17	31.0701
FANCA	-0.688983	1.85344	-9.09581	2.07373e-18	6.77729e-17	31.0516
SFXN4	-0.603621	4.37646	-9.0941	2.1021e-18	6.85382e-17	31.0382
SLC15A2	1.08991	2.89141	9.07658	2.41475e-18	7.83635e-17	30.902
TFF1	-2.99037	1.95763	-9.07579	2.42992e-18	7.86714e-17	30.8958
TP53INP1	0.838693	4.75269	9.07436	2.45747e-18	7.93779e-17	30.8848
CDC42EP3	0.891	3.7864	9.07244	2.49522e-18	8.04098e-17	30.8698
A2M	1.1892	7.51661	9.06847	2.57468e-18	8.27781e-17	30.839
BUB1	-0.980859	2.21746	-9.06479	2.65079e-18	8.50277e-17	30.8104
SLC2A1	-1.33514	4.89486	-9.0566	2.82797e-18	9.0293e-17	30.7468
ACAD8	0.859518	3.6907	9.05462	2.87248e-18	9.15034e-17	30.7315
GSTP1	-0.833204	8.38611	-9.04308	3.14635e-18	9.99976e-17	30.642
MAFG	-0.59305	3.83893	-9.03993	3.22559e-18	1.02281e-16	30.6176
IQGAP3	-0.897149	2.96124	-9.03889	3.25221e-18	1.0289e-16	30.6095
LRIG3	1.16757	4.02444	9.03362	3.39027e-18	1.0677e-16	30.5687
PLEKHH2	0.845389	2.21973	9.03038	3.47804e-18	1.09286e-16	30.5436
SLC7A1	-0.712946	3.37645	-9.02882	3.52099e-18	1.10386e-16	30.5315
ZDHHC15	0.676163	0.697158	9.02755	3.55636e-18	1.11243e-16	30.5217
SALL2	1.00548	2.52185	9.02506	3.62677e-18	1.13189e-16	30.5025
GALNT4	-0.634252	0.696048	-9.02353	3.67096e-18	1.14311e-16	30.4906
KIF20A	-0.869228	2.64093	-9.02021	3.76805e-18	1.17071e-16	30.4649
MYBL2	-1.27928	3.99381	-9.01739	3.85266e-18	1.19432e-16	30.4431
P2RY12	0.839296	1.36987	9.01594	3.8971e-18	1.2054e-16	30.4318
TOMM40	-0.592228	4.58574	-9.01187	4.02397e-18	1.24187e-16	30.4004
ABCA8	0.850104	1.31873	9.00816	4.14319e-18	1.27583e-16	30.3717
CHEK1	-0.842036	1.86367	-9.0054	4.23408e-18	1.30092e-16	30.3504
KLHL25	-0.558144	1.94883	-9.00249	4.33215e-18	1.32811e-16	30.3279
LST1	1.00179	4.09841	8.99865	4.46505e-18	1.36583e-16	30.2982
B4GALT4	-0.689451	3.17446	-8.99502	4.59418e-18	1.40145e-16	30.2702
SLC5A6	-0.529364	3.38137	-8.99481	4.60171e-18	1.40145e-16	30.2686
MNDA	1.16614	4.23275	8.9825	5.06922e-18	1.54044e-16	30.1736
ST3GAL6	0.692938	1.49189	8.98109	5.12543e-18	1.55412e-16	30.1627
SORD	-0.771672	2.79492	-8.97406	5.41619e-18	1.63869e-16	30.1086
BOLA3	-0.618984	2.89806	-8.96742	5.70596e-18	1.7226e-16	30.0574
CENPI	-0.721969	1.3893	-8.96697	5.72604e-18	1.72324e-16	30.0539
SMOX	-0.947706	2.91638	-8.96682	5.73293e-18	1.72324e-16	30.0527
SHCBP1	-0.817271	1.9225	-8.95552	6.26415e-18	1.87478e-16	29.9657
C5orf38	1.48987	2.40859	8.95458	6.3105e-18	1.88458e-16	29.9585
CKMT1A	-1.11976	1.2218	-8.95171	6.4536e-18	1.92317e-16	29.9364
TGFB1	0.7302	4.99964	8.95092	6.49386e-18	1.93102e-16	29.9303
AUTS2	1.15923	3.32003	8.94908	6.58813e-18	1.95485e-16	29.9162
NCALD	0.894767	2.75944	8.94648	6.72391e-18	1.99088e-16	29.8962
SLC45A4	-0.882795	3.50298	-8.94504	6.7999e-18	2.00909e-16	29.8851
COX5A	-0.522704	5.65018	-8.92007	8.26696e-18	2.43217e-16	29.6933
RFC4	-0.763271	2.97127	-8.9192	8.32297e-18	2.44346e-16	29.6866
SLC41A1	0.642118	3.76488	8.91281	8.74912e-18	2.56314e-16	29.6376
C1orf112	-0.568861	1.74897	-8.90199	9.52041e-18	2.78321e-16	29.5546
HHIP	1.30445	1.13552	8.89891	9.75226e-18	2.84499e-16	29.531
SLC25A29	0.895371	3.51044	8.88828	1.05951e-17	3.08438e-16	29.4496
FGL1	-2.6301	1.72086	-8.88711	1.06916e-17	3.10594e-16	29.4407
MEGF6	0.983975	3.43881	8.88249	1.10841e-17	3.21322e-16	29.4053
STC2	-1.13631	1.86607	-8.87824	1.14572e-17	3.31447e-16	29.3728
PRG4	1.43455	1.45764	8.87412	1.18308e-17	3.4083e-16	29.3413
SSBP2	0.640556	1.76628	8.86777	1.24304e-17	3.5736e-16	29.2928
ACAT2	-0.666348	2.94361	-8.85863	1.33458e-17	3.82883e-16	29.223
TRAF2	-0.658192	3.92542	-8.85656	1.3563e-17	3.88311e-16	29.2071
RNF186	-1.20947	1.10646	-8.84549	1.47815e-17	4.20589e-16	29.1227
GAST	-0.501047	0.242815	-8.84288	1.50839e-17	4.28314e-16	29.1028
FLNA	1.00221	6.67707	8.84245	1.51338e-17	4.28508e-16	29.0996
AQP4	1.78866	3.84489	8.84229	1.51526e-17	4.28508e-16	29.0983
THBS4	1.50371	1.80933	8.83625	1.5881e-17	4.48193e-16	29.0522
FBP1	1.05937	6.13727	8.82998	1.66722e-17	4.67665e-16	29.0045
SMARCA2	0.666194	4.18765	8.82703	1.70579e-17	4.77518e-16	28.9821
MUC13	-2.53883	2.68838	-8.82186	1.77569e-17	4.95084e-16	28.9426
ZNF682	0.878183	1.44579	8.8185	1.82243e-17	5.07096e-16	28.9171
DHX37	-0.511923	3.15448	-8.81431	1.88259e-17	5.22786e-16	28.8852
POLE2	-0.712068	1.84599	-8.81321	1.89871e-17	5.26207e-16	28.8769
ANLN	-1.10115	2.91808	-8.81084	1.93398e-17	5.34915e-16	28.8588
NLRP1	0.776728	2.50059	8.80884	1.96407e-17	5.42154e-16	28.8436
CRY2	0.591562	3.77481	8.79738	2.14627e-17	5.88928e-16	28.7565
PPP1R1B	1.99811	3.64056	8.79454	2.19398e-17	6.00831e-16	28.735
MRPS35	-0.626847	5.37282	-8.79139	2.24811e-17	6.14439e-16	28.711
CGNL1	0.891455	3.08339	8.78865	2.2963e-17	6.26374e-16	28.6902
TPI1	-0.562118	7.3723	-8.77626	2.52712e-17	6.87981e-16	28.5962
KCTD3	-0.778613	3.74606	-8.77478	2.55607e-17	6.94498e-16	28.585
TNXB	0.894382	1.90042	8.7721	2.60956e-17	7.07603e-16	28.5647
ADCY9	0.747202	2.9332	8.76917	2.66934e-17	7.21034e-16	28.5424
GULP1	-1.0184	2.38791	-8.76882	2.67644e-17	7.21544e-16	28.5398
HSF2BP	-0.605753	0.836161	-8.7659	2.73749e-17	7.3657e-16	28.5177
C1orf162	0.870952	4.09724	8.76477	2.76153e-17	7.41598e-16	28.5091
ITGB2	1.10781	5.56827	8.75711	2.92961e-17	7.85215e-16	28.4511
C16orf54	0.866173	2.45224	8.75602	2.95435e-17	7.90318e-16	28.4429
UBE2S	-0.882655	3.17658	-8.75325	3.01826e-17	8.05859e-16	28.4219
ZNF100	0.544003	1.81887	8.75126	3.06479e-17	8.16708e-16	28.4068
GAL	-1.49875	0.612219	-8.74083	3.32129e-17	8.83362e-16	28.3279
IL1R2	-1.10031	1.95742	-8.74058	3.32774e-17	8.8338e-16	28.326
PPIF	-0.54584	4.90858	-8.73918	3.36389e-17	8.9127e-16	28.3154
APLP2	0.758777	7.31042	8.72946	3.6252e-17	9.58671e-16	28.242
FKBP4	-0.725982	4.72649	-8.72759	3.67775e-17	9.68871e-16	28.2279
SPATA6	0.619931	2.20635	8.71407	4.08082e-17	1.07302e-15	28.1258
BASP1	-1.27904	5.13431	-8.70761	4.28842e-17	1.12334e-15	28.0771
SKI	0.548417	4.79758	8.70624	4.3336e-17	1.13303e-15	28.0668
CX3CR1	1.00777	1.27553	8.70147	4.49525e-17	1.17308e-15	28.0309
ABI3BP	0.988448	2.38106	8.69907	4.57881e-17	1.19264e-15	28.0128
PTPRG	0.778543	2.5262	8.69207	4.83161e-17	1.25378e-15	27.9601
NAPSA	2.1693	8.38236	8.68937	4.93283e-17	1.27765e-15	27.9397
ARTN	-0.927095	1.42142	-8.68555	5.07936e-17	1.31315e-15	27.911
FUCA1	0.73686	6.22304	8.68489	5.10509e-17	1.31734e-15	27.906
NCF4	0.882821	4.11437	8.6812	5.25158e-17	1.35262e-15	27.8783
TXNIP	1.03308	7.41262	8.67914	5.33518e-17	1.37161e-15	27.8628
RASSF2	0.767298	3.54026	8.67225	5.62455e-17	1.44065e-15	27.8109
ROBO2	0.666265	0.908558	8.6685	5.78851e-17	1.47719e-15	27.7827
GOLM1	-0.910965	6.39353	-8.65879	6.23507e-17	1.58822e-15	27.7098
C11orf24	-0.5266	4.51542	-8.65802	6.27184e-17	1.59466e-15	27.704
CD4	0.862089	5.19604	8.65429	6.45342e-17	1.63782e-15	27.676
TRIP13	-1.02357	2.83673	-8.65208	6.56303e-17	1.66259e-15	27.6595
AVPI1	-0.872707	4.42455	-8.64592	6.87979e-17	1.73966e-15	27.6132
RFC3	-0.631197	2.8544	-8.63926	7.23898e-17	1.82715e-15	27.5633
DOCK10	0.741938	2.42923	8.63505	7.47528e-17	1.88336e-15	27.5318
C8G	-0.942033	1.22026	-8.63391	7.54093e-17	1.89645e-15	27.5232
CD52	1.09787	5.88211	8.62717	7.93898e-17	1.98575e-15	27.4727
FAM83A	-1.68507	4.15106	-8.62659	7.97423e-17	1.99097e-15	27.4684
CLIC5	1.19074	2.75592	8.62369	8.15215e-17	2.03173e-15	27.4467
CENPJ	-0.530583	2.00821	-8.6232	8.18293e-17	2.03574e-15	27.443
MAPK6	-0.5981	3.52006	-8.62077	8.33585e-17	2.07007e-15	27.4249
KPNA2	-0.765676	5.03188	-8.61978	8.39904e-17	2.07831e-15	27.4174
SNRPD1	-0.540092	3.77436	-8.61365	8.80112e-17	2.17392e-15	27.3716
EVI2B	0.917338	4.26668	8.61317	8.83304e-17	2.17406e-15	27.368
CSF1	0.837852	4.18264	8.61153	8.9446e-17	2.19761e-15	27.3557
TIPIN	-0.528489	2.04182	-8.5994	9.81008e-17	2.40174e-15	27.2651
SLFN5	0.744031	4.3014	8.59692	9.99692e-17	2.44316e-15	27.2466
DOCK8	0.761974	2.91429	8.59507	1.01389e-16	2.47349e-15	27.2327
FZD10	-1.54642	0.996729	-8.58747	1.07422e-16	2.61606e-15	27.176
APOBEC3C	0.808068	4.48805	8.58469	1.09717e-16	2.66727e-15	27.1553
GNAI2	0.513936	5.741	8.58439	1.09969e-16	2.66871e-15	27.153
DUSP6	1.15243	5.64051	8.58228	1.11743e-16	2.70704e-15	27.1373
UHRF1	-0.799163	2.19419	-8.56887	1.23729e-16	2.99217e-15	27.0373
CMTM7	0.683433	3.86839	8.56143	1.30927e-16	3.16071e-15	26.9819
SCD5	1.03251	2.6923	8.55818	1.3419e-16	3.23387e-15	26.9577
TMEM130	1.37893	2.61613	8.54136	1.52445e-16	3.65473e-15	26.8326
STXBP1	0.87951	3.96604	8.5403	1.53664e-16	3.67758e-15	26.8248
EPS8L3	-1.45266	0.762827	-8.52914	1.67218e-16	3.99506e-15	26.7419
NCAPD2	-0.646983	4.07904	-8.52381	1.74102e-16	4.15238e-15	26.7023
EFEMP1	1.06822	5.28344	8.51969	1.79613e-16	4.27646e-15	26.6717
GAN	-0.502751	1.51398	-8.51754	1.82549e-16	4.33148e-15	26.6558
SPINK4	-1.57156	0.787386	-8.50485	2.00928e-16	4.75129e-15	26.5617
FA2H	-1.31645	3.34338	-8.5011	2.06692e-16	4.87926e-15	26.534
RUVBL1	-0.529146	3.64856	-8.49993	2.08533e-16	4.91435e-15	26.5253
IL1R1	0.793278	5.05785	8.49653	2.13951e-16	5.03347e-15	26.5001
RCBTB2	0.560012	2.51372	8.49339	2.19074e-16	5.14528e-15	26.4769
TDRD10	1.24198	2.2348	8.48546	2.3258e-16	5.45323e-15	26.4182
LYST	0.57609	2.19735	8.48003	2.42296e-16	5.67144e-15	26.3781
MAML2	0.767886	2.87901	8.47762	2.4674e-16	5.76308e-15	26.3602
CD302	0.844999	2.9254	8.47729	2.47355e-16	5.76308e-15	26.3578
TLE4	0.62564	2.22607	8.47645	2.48918e-16	5.78734e-15	26.3516
PTGDS	1.20648	5.54534	8.47596	2.49847e-16	5.79921e-15	26.348
RRAD	1.46955	4.65683	8.47163	2.58124e-16	5.97133e-15	26.316
NPAS1	-0.60908	0.776339	-8.46003	2.81684e-16	6.49466e-15	26.2303
TUBA1C	-0.57571	4.99551	-8.4595	2.82803e-16	6.50965e-15	26.2264
ATP8B2	0.676865	3.3729	8.44375	3.18346e-16	7.3035e-15	26.1103
PAICS	-0.593972	4.2326	-8.44149	3.2381e-16	7.41659e-15	26.0936
CD37	0.904405	3.95884	8.44062	3.25918e-16	7.45254e-15	26.0873
DNMT3B	-0.801439	1.19105	-8.4364	3.36424e-16	7.6801e-15	26.0562
ZNF431	0.607376	1.96204	8.4308	3.50861e-16	7.99652e-15	26.0149
RSPO2	0.648959	0.674427	8.4244	3.68132e-16	8.37635e-15	25.9678
NFXL1	-0.513854	2.49771	-8.42398	3.69273e-16	8.38855e-15	25.9648
CD47	0.749199	5.34039	8.4191	3.83051e-16	8.6873e-15	25.9289
CD44	0.932926	5.19248	8.40738	4.18195e-16	9.46885e-15	25.8428
GABARAPL1	-0.704747	4.71606	-8.4003	4.40968e-16	9.95427e-15	25.7908
TEPP	0.928491	1.0284	8.40027	4.41071e-16	9.95427e-15	25.7905
EEF1E1	-0.572545	2.90802	-8.39894	4.45467e-16	1.00328e-14	25.7808
LEFTY2	0.712028	0.470285	8.39878	4.45999e-16	1.00328e-14	25.7797
CAMK2D	0.655367	4.02181	8.39715	4.5147e-16	1.01394e-14	25.7677
ENG	0.709554	5.48902	8.39625	4.54524e-16	1.01798e-14	25.7611
MS4A7	0.964895	4.12968	8.39619	4.54736e-16	1.01798e-14	25.7606
EMG1	-0.554333	2.72588	-8.38487	4.94909e-16	1.10612e-14	25.6776
VEPH1	1.07072	1.78756	8.38076	5.10336e-16	1.13876e-14	25.6475
TPSAB1	1.24463	4.3028	8.37679	5.25713e-16	1.17119e-14	25.6184
MACF1	0.651984	3.79393	8.37605	5.28617e-16	1.17577e-14	25.613
TRAIP	-0.554462	1.79709	-8.37445	5.34962e-16	1.18798e-14	25.6013
FGL2	1.06939	4.44655	8.37405	5.36559e-16	1.18962e-14	25.5984
TCF21	0.887571	2.00017	8.37102	5.48843e-16	1.21491e-14	25.5762
CYP27A1	0.950911	4.69653	8.36732	5.64207e-16	1.24497e-14	25.5491
NDRG2	0.884251	3.33288	8.36732	5.6422e-16	1.24497e-14	25.5491
PRRT3	0.697697	1.91173	8.35913	5.99786e-16	1.32134e-14	25.4892
KLK8	-1.66677	0.837232	-8.35573	6.15179e-16	1.35096e-14	25.4643
SEMA4G	-0.944918	2.34156	-8.35405	6.22933e-16	1.36582e-14	25.452
MGLL	0.967117	4.89621	8.35375	6.24318e-16	1.36669e-14	25.4498
DCLRE1A	-0.529934	2.71499	-8.35181	6.33405e-16	1.3844e-14	25.4357
ALDH18A1	-0.505406	5.2539	-8.3488	6.47757e-16	1.41154e-14	25.4137
HDC	0.861995	1.75492	8.34878	6.47861e-16	1.41154e-14	25.4136
SUSD4	1.16648	2.47212	8.34681	6.57447e-16	1.43018e-14	25.3991
TGFBR2	0.747373	5.62665	8.34371	6.72786e-16	1.45897e-14	25.3765
CFLAR	0.561072	3.98864	8.33587	7.13254e-16	1.54431e-14	25.3193
FAM83H	-0.7436	5.11979	-8.32999	7.45129e-16	1.6108e-14	25.2764
RASGRP4	0.532919	1.33266	8.32632	7.65735e-16	1.65277e-14	25.2497
ZNF253	0.548768	2.44714	8.32415	7.78196e-16	1.67706e-14	25.2338
IL16	0.678905	2.24935	8.32319	7.83804e-16	1.68652e-14	25.2268
RHOF	-0.779339	1.65931	-8.31947	8.05741e-16	1.73103e-14	25.1997
MASTL	-0.56875	2.72015	-8.31799	8.1468e-16	1.74753e-14	25.1889
PTS	-0.534664	3.18991	-8.31503	8.32816e-16	1.78092e-14	25.1673
NLN	-0.528086	2.73996	-8.3132	8.44204e-16	1.80249e-14	25.154
USP44	0.815059	1.15921	8.30901	8.70877e-16	1.85657e-14	25.1235
COL4A3	1.04702	2.34806	8.295	9.66283e-16	2.0568e-14	25.0216
TRIM2	0.985248	4.26929	8.29402	9.73301e-16	2.06751e-14	25.0145
RIC3	0.635433	0.846068	8.29388	9.74299e-16	2.06751e-14	25.0135
PLEKHH1	-0.782218	1.13146	-8.29218	9.86709e-16	2.09065e-14	25.0011
NDUFV2	-0.568847	3.01968	-8.28799	1.0178e-15	2.14994e-14	24.9707
ZMAT1	0.869215	2.15657	8.28621	1.03135e-15	2.17526e-14	24.9577
LTBP2	0.947935	5.14415	8.28322	1.05442e-15	2.22053e-14	24.936
AACS	-0.556762	2.61506	-8.28142	1.06857e-15	2.24692e-14	24.923
MYEOV	-1.7217	2.19659	-8.27765	1.09884e-15	2.30707e-14	24.8956
DTL	-0.730133	2.26039	-8.27454	1.12442e-15	2.35719e-14	24.873
GRAMD1B	-0.967267	1.4508	-8.27042	1.15924e-15	2.42653e-14	24.8431
RAD54L	-0.785968	1.70358	-8.26509	1.20587e-15	2.51652e-14	24.8045
ZFP3	0.548411	1.96456	8.26456	1.21059e-15	2.52259e-14	24.8006
ARHGAP18	0.645131	4.08401	8.26164	1.23703e-15	2.57379e-14	24.7795
CD40LG	0.713077	1.57726	8.25414	1.30752e-15	2.71272e-14	24.7251
EGLN1	-0.566212	3.65523	-8.25363	1.31243e-15	2.71656e-14	24.7215
CYP4B1	1.94701	4.54254	8.25352	1.31349e-15	2.71656e-14	24.7207
CREG2	-0.651818	0.294001	-8.25135	1.33475e-15	2.75643e-14	24.7049
MARVELD3	-0.698674	2.79555	-8.24748	1.37349e-15	2.8322e-14	24.6769
FILIP1L	0.867607	3.91198	8.24222	1.42779e-15	2.93981e-14	24.6389
PLK4	-0.659194	1.79983	-8.24174	1.43295e-15	2.94134e-14	24.6354
RPP25	-0.742795	3.26097	-8.24155	1.4349e-15	2.94134e-14	24.634
STK32A	1.09944	2.51504	8.23204	1.53923e-15	3.14126e-14	24.5652
GPSM3	0.744549	5.13604	8.22448	1.62745e-15	3.31642e-14	24.5106
SUV39H2	-0.543935	2.36861	-8.21742	1.71422e-15	3.4881e-14	24.4597
SLC25A42	0.543828	2.65209	8.20134	1.92962e-15	3.91489e-14	24.3437
FECH	-0.619508	3.40594	-8.19961	1.95432e-15	3.95921e-14	24.3312
ESAM	0.797736	4.7093	8.19714	1.99011e-15	4.02584e-14	24.3134
CITED2	0.850676	5.62946	8.19519	2.01888e-15	4.07808e-14	24.2994
SCARF1	0.729377	3.00352	8.1839	2.19336e-15	4.41764e-14	24.2181
CSF1R	0.906281	5.26166	8.1709	2.41287e-15	4.83167e-14	24.1247
TSC22D3	0.920316	6.01577	8.1702	2.42543e-15	4.84981e-14	24.1196
LRRC36	0.926567	1.40991	8.16868	2.45247e-15	4.89682e-14	24.1087
CA3	0.98079	1.75558	8.16795	2.46572e-15	4.91617e-14	24.1034
CKAP4	-0.59695	5.70264	-8.15658	2.67995e-15	5.33565e-14	24.0218
RSPO3	-1.25983	1.99496	-8.15473	2.71653e-15	5.4004e-14	24.0085
IDS	0.694366	4.67378	8.15454	2.72027e-15	5.4004e-14	24.0072
NR3C2	0.829157	2.59719	8.14928	2.82717e-15	5.59658e-14	23.9694
SPRED2	0.549802	4.26652	8.14668	2.88128e-15	5.68745e-14	23.9508
COL14A1	1.08662	3.09563	8.13913	3.04492e-15	5.99338e-14	23.8967
TNS1	0.781718	4.50396	8.13218	3.2037e-15	6.28806e-14	23.8469
ANKRD9	-0.718544	2.64994	-8.12763	3.31203e-15	6.49149e-14	23.8143
LAMA2	0.796457	2.95317	8.12599	3.35191e-15	6.56037e-14	23.8026
TAGAP	0.771796	2.91667	8.11371	3.66622e-15	7.16541e-14	23.7147
LAMP3	1.26105	5.55402	8.1133	3.6771e-15	7.17657e-14	23.7118
EML4	0.570613	4.67612	8.11271	3.69292e-15	7.19731e-14	23.7076
FGD2	0.64415	2.22571	8.11244	3.70035e-15	7.20165e-14	23.7057
GCNT2	-0.633776	2.83407	-8.10733	3.84093e-15	7.46476e-14	23.6691
SLIT2	0.810992	2.82121	8.10642	3.86632e-15	7.50358e-14	23.6627
APOO	-0.537619	3.84626	-8.10047	4.03773e-15	7.82529e-14	23.6202
BTG2	0.951374	5.99492	8.10022	4.04501e-15	7.82844e-14	23.6184
ENTPD7	-0.60523	3.04587	-8.09525	4.19419e-15	8.10553e-14	23.5829
SORBS1	0.679142	2.35782	8.09261	4.27562e-15	8.24023e-14	23.5641
CADM1	1.14107	3.61608	8.09094	4.3279e-15	8.32941e-14	23.5522
GUCA2B	-0.866736	0.356994	-8.08252	4.60132e-15	8.83109e-14	23.4922
FAM117A	0.555165	3.32899	8.08089	4.65622e-15	8.92411e-14	23.4805
E2F8	-0.726404	1.81304	-8.07786	4.76019e-15	9.11078e-14	23.4589
GAS7	0.723605	2.69089	8.07471	4.87023e-15	9.30853e-14	23.4365
EFHC2	0.906514	1.56593	8.07386	4.90034e-15	9.35317e-14	23.4305
CBLC	-1.05078	4.34466	-8.06695	5.15274e-15	9.80789e-14	23.3813
MRPL15	-0.586439	5.46512	-8.0619	5.34516e-15	1.01602e-13	23.3454
F12	-0.965928	1.91632	-8.05904	5.45735e-15	1.03593e-13	23.325
IL11RA	0.550444	2.56177	8.05357	5.67833e-15	1.0764e-13	23.2861
PODN	0.894918	4.04999	8.0497	5.84013e-15	1.10556e-13	23.2586
CYBRD1	0.927204	4.92637	8.04922	5.86044e-15	1.10638e-13	23.2552
DYNC2H1	0.578138	1.3691	8.04619	5.99043e-15	1.12938e-13	23.2337
PLXNC1	0.676219	2.85238	8.04571	6.01133e-15	1.13178e-13	23.2303
ZNF750	1.30014	2.60876	8.04256	6.15051e-15	1.15544e-13	23.2079
CDC42EP1	0.934989	5.75301	8.04032	6.25091e-15	1.17211e-13	23.192
SMOC1	-1.73463	1.6964	-8.0372	6.39369e-15	1.19726e-13	23.1699
PYCR1	-0.837146	5.45844	-8.0276	6.85393e-15	1.28171e-13	23.1018
SLCO3A1	0.686345	2.93105	8.02713	6.87739e-15	1.28437e-13	23.0985
PHACTR1	0.669973	1.58509	8.02499	6.98461e-15	1.30263e-13	23.0833
LPXN	0.683606	3.99761	8.02034	7.22391e-15	1.34545e-13	23.0503
PSRC1	-0.635695	2.19512	-8.01774	7.3608e-15	1.36911e-13	23.0319
SPRY1	0.682256	4.35136	8.00483	8.08065e-15	1.49298e-13	22.9406
MYBPHL	1.41992	1.72601	8.00228	8.23075e-15	1.51869e-13	22.9225
ARRDC3	0.797242	5.47815	7.99575	8.62795e-15	1.58986e-13	22.8764
AIF1	0.917559	5.05335	7.98727	9.17245e-15	1.68795e-13	22.8164
SDC4	0.7241	7.59733	7.98331	9.438e-15	1.73451e-13	22.7885
AKNA	0.568251	3.39393	7.98026	9.64738e-15	1.77065e-13	22.767
SELPLG	0.801917	4.60684	7.97551	9.98365e-15	1.82752e-13	22.7334
ZNF429	0.529087	1.88461	7.96937	1.0435e-14	1.9051e-13	22.6902
HLA-E	0.64155	8.36262	7.96109	1.10755e-14	2.01939e-13	22.6318
FCGR2A	0.841607	4.27721	7.96003	1.11601e-14	2.03214e-13	22.6244
GLCE	-0.589935	3.38776	-7.95661	1.14381e-14	2.07457e-13	22.6003
TNFAIP8L2	0.8238	3.70128	7.95552	1.15276e-14	2.08807e-13	22.5926
AHR	0.868513	5.38157	7.95124	1.18882e-14	2.15059e-13	22.5625
ABCA6	0.560917	1.3654	7.94925	1.20592e-14	2.178e-13	22.5485
CA10	1.019	0.666915	7.94911	1.20712e-14	2.178e-13	22.5475
RTN4RL1	0.966014	1.29204	7.94853	1.21215e-14	2.18424e-13	22.5434
KIF21A	-0.667903	2.78368	-7.94826	1.21455e-14	2.18452e-13	22.5415
FBLN5	0.881442	4.02262	7.9466	1.22907e-14	2.20611e-13	22.5299
IRS2	-1.03297	3.33295	-7.94463	1.2466e-14	2.23469e-13	22.516
PPARGC1A	-1.05321	1.09703	-7.94312	1.26017e-14	2.25165e-13	22.5054
SLC40A1	0.963886	5.90416	7.94312	1.26017e-14	2.25165e-13	22.5054
OGN	1.10026	1.61187	7.94304	1.26094e-14	2.25165e-13	22.5048
PRNP	0.695205	5.08169	7.94192	1.27113e-14	2.26692e-13	22.4969
PFKP	-0.933998	5.13839	-7.94085	1.28089e-14	2.2801e-13	22.4894
RTN1	0.728429	1.71961	7.94075	1.28181e-14	2.2801e-13	22.4887
MSN	0.705908	6.81266	7.94048	1.28429e-14	2.28158e-13	22.4868
SLC25A10	-0.730899	3.41593	-7.94022	1.28671e-14	2.28296e-13	22.485
NCKAP1L	0.824197	3.18441	7.93993	1.28942e-14	2.28485e-13	22.4829
SNRPF	-0.547325	4.09189	-7.93929	1.2953e-14	2.29233e-13	22.4785
DCN	1.02254	5.54184	7.93784	1.30886e-14	2.31338e-13	22.4683
NQO2	-0.540887	2.53829	-7.93516	1.3343e-14	2.35533e-13	22.4494
PDIA3	-0.607312	7.27192	-7.93305	1.35467e-14	2.38826e-13	22.4346
TCEAL3	0.574059	3.75422	7.92799	1.40469e-14	2.47328e-13	22.3991
LIX1L	0.611991	3.59774	7.9262	1.42288e-14	2.49897e-13	22.3865
MYO1G	1.08103	2.92483	7.92504	1.43469e-14	2.51653e-13	22.3784
RPP40	-0.601029	2.42882	-7.92341	1.4516e-14	2.54296e-13	22.3669
GINS1	-0.768389	2.39457	-7.91061	1.59097e-14	2.77659e-13	22.2772
CYP4X1	1.25068	3.20077	7.90791	1.622e-14	2.82717e-13	22.2582
DOCK9	0.666939	3.66606	7.90061	1.70891e-14	2.97119e-13	22.2071
GLA	-0.573756	4.3577	-7.88778	1.87304e-14	3.2484e-13	22.1174
CMBL	-1.28495	3.87551	-7.88532	1.90619e-14	3.29764e-13	22.1002
MMP28	1.53645	3.41424	7.88493	1.91154e-14	3.30277e-13	22.0974
CD300LF	0.889691	3.14687	7.8782	2.00566e-14	3.46108e-13	22.0504
SLFN12	0.604388	2.35041	7.87606	2.03649e-14	3.5099e-13	22.0355
MAFK	-0.87525	4.2912	-7.87541	2.04598e-14	3.52189e-13	22.0309
CTDSPL	0.576339	3.88093	7.8719	2.0979e-14	3.60677e-13	22.0064
CTSG	0.931937	1.0589	7.8702	2.12344e-14	3.64617e-13	21.9945
CD69	1.02427	2.61096	7.86927	2.13757e-14	3.66248e-13	21.988
NME1	-0.624652	4.44577	-7.86734	2.16715e-14	3.70743e-13	21.9746
FABP3	1.30642	4.05287	7.86611	2.18623e-14	3.73546e-13	21.966
SLC39A8	0.886294	4.53297	7.85811	2.31441e-14	3.94475e-13	21.9102
SMARCD3	0.756455	3.30229	7.85715	2.33033e-14	3.967e-13	21.9035
ENDOD1	0.829409	4.64512	7.85501	2.3661e-14	4.02296e-13	21.8886
DBF4	-0.55487	2.26949	-7.85118	2.43161e-14	4.12927e-13	21.8619
FGFR2	0.966839	2.58997	7.84716	2.50218e-14	4.2439e-13	21.8339
IGSF6	0.960298	4.18464	7.84584	2.52571e-14	4.27858e-13	21.8247
FMO4	0.599647	2.31224	7.84477	2.54497e-14	4.30593e-13	21.8173
BRCA1	-0.61454	1.8143	-7.83619	2.705e-14	4.56556e-13	21.7576
GPRASP1	0.529093	1.63104	7.83518	2.72462e-14	4.59307e-13	21.7505
PAG1	0.816874	3.14638	7.8321	2.78488e-14	4.68895e-13	21.7291
CEACAM4	0.829101	1.69162	7.83165	2.79374e-14	4.69815e-13	21.726
CCNE1	-0.917101	2.35459	-7.82985	2.82983e-14	4.75309e-13	21.7134
MCM4	-0.734968	3.89526	-7.82756	2.87617e-14	4.82507e-13	21.6975
UCHL3	-0.523473	2.87497	-7.82505	2.92777e-14	4.90569e-13	21.6801
RAB26	-0.86629	1.62254	-7.82297	2.97136e-14	4.97272e-13	21.6656
TNFSF10	0.984794	5.95952	7.82099	3.0135e-14	5.03716e-13	21.6519
SERPIND1	1.604	1.60993	7.82012	3.03211e-14	5.06217e-13	21.6458
COMTD1	-0.83541	3.60276	-7.81891	3.05833e-14	5.09979e-13	21.6374
CCR4	0.806089	1.85234	7.80787	3.30722e-14	5.50158e-13	21.5608
CENPL	-0.520253	1.92075	-7.8047	3.38258e-14	5.62019e-13	21.5388
SMAD7	0.528342	3.80447	7.80195	3.44903e-14	5.71689e-13	21.5197
PHKA1	-0.588939	2.8079	-7.80028	3.4901e-14	5.77805e-13	21.5081
FIGN	-0.558863	0.936713	-7.7942	3.6436e-14	6.0178e-13	21.466
FEN1	-0.57992	4.02422	-7.79264	3.68415e-14	6.07752e-13	21.4552
KIF15	-0.680922	1.36188	-7.79038	3.74336e-14	6.16787e-13	21.4396
MYLIP	0.599919	4.25493	7.78916	3.77574e-14	6.21383e-13	21.4312
IVD	0.599261	4.02782	7.78159	3.98365e-14	6.54822e-13	21.3787
ARHGEF17	0.525729	3.71346	7.77827	4.0782e-14	6.69569e-13	21.3557
STIL	-0.5996	1.68314	-7.77129	4.28419e-14	7.02521e-13	21.3075
ARHGAP30	0.731368	3.95344	7.77113	4.28905e-14	7.02521e-13	21.3064
MAP6	0.734174	1.88594	7.76955	4.33728e-14	7.09583e-13	21.2955
CXorf21	0.699791	2.48466	7.7648	4.48526e-14	7.31203e-13	21.2626
NRGN	1.2899	4.38083	7.75843	4.69142e-14	7.62731e-13	21.2187
NRP1	0.68676	4.56885	7.75733	4.72792e-14	7.67153e-13	21.2111
DES	1.28437	2.89933	7.75521	4.79909e-14	7.77789e-13	21.1965
SESN1	0.549695	2.75938	7.7505	4.96101e-14	8.03092e-13	21.164
PRTFDC1	-0.749965	2.93449	-7.75018	4.97233e-14	8.03986e-13	21.1618
RASSF8	0.788586	2.40325	7.74187	5.27215e-14	8.4949e-13	21.1045
AOC3	0.892893	4.2498	7.73943	5.36348e-14	8.62904e-13	21.0877
COQ3	-0.516417	2.65033	-7.73778	5.42622e-14	8.71276e-13	21.0763
CYC1	-0.593354	5.81498	-7.73512	5.52869e-14	8.85677e-13	21.058
TNFSF12	0.611568	4.78203	7.73451	5.55261e-14	8.88481e-13	21.0538
TAPT1	0.528985	3.15406	7.73268	5.62436e-14	8.98924e-13	21.0412
DIAPH3	-0.626878	1.1875	-7.73056	5.70876e-14	9.10313e-13	21.0266
ARHGEF4	-0.878739	1.35228	-7.72848	5.79322e-14	9.2272e-13	21.0122
MOCS1	0.587392	2.40698	7.72468	5.94994e-14	9.46594e-13	20.9861
CORO1A	0.782188	4.51281	7.72268	6.03434e-14	9.5892e-13	20.9723
STK11	0.545046	3.34831	7.71846	6.21566e-14	9.86602e-13	20.9434
SCGB3A1	2.4162	6.32612	7.71655	6.29983e-14	9.98818e-13	20.9302
KRT18	-0.754572	7.50372	-7.71348	6.43702e-14	1.0194e-12	20.9091
FAM83F	-0.904203	1.05338	-7.7123	6.49046e-14	1.02669e-12	20.9011
GINS2	-0.812286	2.26379	-7.70766	6.70554e-14	1.05709e-12	20.8692
MAN1C1	0.661243	2.1999	7.70733	6.72127e-14	1.05837e-12	20.8669
IKZF1	0.723507	2.20673	7.70575	6.79591e-14	1.06891e-12	20.8561
SDF2L1	-0.660427	5.26293	-7.70371	6.89429e-14	1.08193e-12	20.842
CD53	0.889286	5.48916	7.70029	7.06131e-14	1.10688e-12	20.8186
HYLS1	-0.535555	2.10045	-7.69894	7.12868e-14	1.11618e-12	20.8093
CD3EAP	-0.524074	2.05217	-7.69737	7.20754e-14	1.12726e-12	20.7985
MAPKAPK3	0.563738	4.61693	7.69403	7.37812e-14	1.15263e-12	20.7756
UTRN	0.598132	3.72413	7.69379	7.39068e-14	1.1533e-12	20.774
SLIT3	0.882371	2.57639	7.68759	7.71909e-14	1.20049e-12	20.7314
CENPM	-0.727274	2.83424	-7.68529	7.84432e-14	1.2186e-12	20.7157
CAT	0.602787	5.15095	7.68397	7.91717e-14	1.22854e-12	20.7067
CCR2	0.797138	2.06388	7.6806	8.10584e-14	1.255e-12	20.6836
RNASE1	1.16045	8.49011	7.67573	8.38708e-14	1.29565e-12	20.6503
GDF11	0.53677	1.80482	7.67509	8.42476e-14	1.30002e-12	20.6459
CEACAM19	-0.716572	2.17387	-7.65766	9.51605e-14	1.46516e-12	20.5267
PTPRE	0.723568	3.79398	7.65333	9.80844e-14	1.50682e-12	20.4971
ABHD3	-0.574086	3.31528	-7.65183	9.9116e-14	1.52099e-12	20.4869
RASAL1	-0.953939	2.19474	-7.65162	9.92596e-14	1.52151e-12	20.4855
HLA-DQA2	1.60423	5.48893	7.64804	1.01773e-13	1.5583e-12	20.461
SGCA	0.847184	2.38182	7.64671	1.02718e-13	1.57105e-12	20.452
MBNL1	0.508209	4.80878	7.64594	1.03277e-13	1.57785e-12	20.4467
CAMK1	0.504251	2.23312	7.64439	1.04401e-13	1.59326e-12	20.4361
ZNF354C	0.522738	1.5888	7.6438	1.04825e-13	1.59797e-12	20.4321
DERA	-0.52903	4.40072	-7.64159	1.06455e-13	1.62104e-12	20.417
PTPRC	0.939531	4.06838	7.62944	1.15863e-13	1.75657e-12	20.3342
GLCCI1	0.796233	3.03501	7.62612	1.18572e-13	1.79568e-12	20.3116
CPVL	0.978133	3.73554	7.62503	1.19475e-13	1.80738e-12	20.3042
DOCK2	0.698358	2.45948	7.62112	1.22766e-13	1.85515e-12	20.2776
JUN	0.794872	6.26626	7.62032	1.23457e-13	1.86153e-12	20.2721
PIK3CD	0.606315	3.35289	7.61595	1.27262e-13	1.91681e-12	20.2424
ZNF43	0.63556	1.81072	7.61477	1.28315e-13	1.93057e-12	20.2343
ITGAM	0.873357	3.49325	7.61142	1.31335e-13	1.97387e-12	20.2116
PLA2G4A	-1.41139	3.69596	-7.60796	1.34536e-13	2.01979e-12	20.188
ARNTL2	-1.08404	2.64756	-7.60715	1.35296e-13	2.029e-12	20.1825
IGF2BP1	-1.15233	0.149252	-7.60197	1.40248e-13	2.09872e-12	20.1474
RRM2B	0.561285	3.9445	7.59735	1.44828e-13	2.16196e-12	20.116
TPD52L1	-0.978078	2.13344	-7.59723	1.44942e-13	2.16196e-12	20.1152
ZNF154	0.562749	1.45007	7.5958	1.46393e-13	2.17892e-12	20.1054
CLEC4A	0.830113	3.27404	7.59449	1.47726e-13	2.19561e-12	20.0966
TMED3	-0.567796	3.67674	-7.59439	1.47832e-13	2.19561e-12	20.0959
UBE2C	-1.08421	4.59475	-7.59191	1.50399e-13	2.23134e-12	20.079
RASGRP2	0.711974	2.03053	7.5871	1.55494e-13	2.29955e-12	20.0465
HDDC3	-0.512173	2.72359	-7.58372	1.59183e-13	2.34909e-12	20.0235
CYCS	-0.501963	5.01497	-7.57621	1.67685e-13	2.4693e-12	19.9727
DAPK2	0.685662	2.24947	7.57025	1.7475e-13	2.56788e-12	19.9323
HCK	0.897277	4.57163	7.56511	1.81088e-13	2.65258e-12	19.8975
CENPH	-0.599139	2.32526	-7.55867	1.89332e-13	2.7704e-12	19.8539
DOK2	0.832975	3.74547	7.55608	1.92753e-13	2.81749e-12	19.8364
DOCK11	0.67102	2.86789	7.55137	1.99128e-13	2.90149e-12	19.8046
P2RY13	0.805993	2.4882	7.55103	1.996e-13	2.90531e-12	19.8023
TMEM100	1.14844	2.09444	7.54683	2.05472e-13	2.98452e-12	19.7739
IER5L	-0.863736	3.26819	-7.54666	2.05716e-13	2.98492e-12	19.7728
DMBT1	1.97926	4.228	7.54273	2.1138e-13	3.0639e-12	19.7462
GPR34	0.908118	3.17405	7.54156	2.1309e-13	3.07903e-12	19.7383
RAC2	0.769366	5.1288	7.53849	2.17655e-13	3.13845e-12	19.7176
PDE4D	-0.894282	2.70309	-7.53811	2.18229e-13	3.14345e-12	19.715
SPAG8	0.720132	1.36817	7.53507	2.22843e-13	3.20325e-12	19.6946
VAV1	0.72476	3.36866	7.5331	2.25896e-13	3.24377e-12	19.6813
RHCG	-0.955861	0.717819	-7.53148	2.28433e-13	3.27342e-12	19.6704
ACSS1	0.798224	3.41456	7.53123	2.28825e-13	3.27565e-12	19.6687
RSPO1	0.51559	0.682072	7.53084	2.29452e-13	3.28123e-12	19.666
PKD2	0.511015	3.45672	7.52472	2.39328e-13	3.4119e-12	19.6248
MEOX2	0.783205	1.99489	7.52308	2.42044e-13	3.44001e-12	19.6138
RUNX1	0.526457	4.11873	7.52045	2.46479e-13	3.49945e-12	19.596
GPT2	-1.02429	3.63178	-7.51279	2.59821e-13	3.68133e-12	19.5445
EFNA3	-0.769199	2.45343	-7.51229	2.60725e-13	3.69037e-12	19.5411
KLHL30	-0.611154	0.954168	-7.51114	2.62792e-13	3.7144e-12	19.5334
CCT5	-0.547775	5.38477	-7.51079	2.63423e-13	3.71716e-12	19.531
ABCC1	-0.583662	4.09278	-7.51063	2.6371e-13	3.71742e-12	19.53
RAI2	0.721715	3.07465	7.50709	2.70219e-13	3.80531e-12	19.5061
CD40	0.811781	4.49986	7.50369	2.76604e-13	3.88732e-12	19.4833
SPI1	0.822788	4.77074	7.49569	2.92247e-13	4.09886e-12	19.4295
GMFG	0.738368	4.52889	7.49502	2.93593e-13	4.11356e-12	19.425
FGD3	0.587828	2.57597	7.4929	2.97902e-13	4.16908e-12	19.4108
MERTK	0.60015	3.20405	7.48793	3.08242e-13	4.30142e-12	19.3774
MRPS12	-0.548633	4.35992	-7.48767	3.08785e-13	4.30466e-12	19.3757
GDF10	0.951895	1.62167	7.48604	3.12262e-13	4.34876e-12	19.3648
NR2F1	0.818099	3.67001	7.4855	3.13418e-13	4.36048e-12	19.3612
SLCO2A1	1.00042	4.53109	7.48536	3.13735e-13	4.36051e-12	19.3602
MTFR1	-0.614609	3.57751	-7.48336	3.18068e-13	4.4163e-12	19.3468
APOH	1.57595	1.13993	7.4802	3.25028e-13	4.50391e-12	19.3256
MRPL13	-0.550764	3.65296	-7.4744	3.38225e-13	4.67742e-12	19.2867
FGG	-2.65395	3.93999	-7.46577	3.58818e-13	4.95233e-12	19.2289
CH25H	1.27106	3.5286	7.46262	3.66646e-13	5.05533e-12	19.2078
FYCO1	0.500313	3.72692	7.46114	3.70395e-13	5.09689e-12	19.1979
TOX	0.870287	2.3768	7.45836	3.77497e-13	5.18946e-12	19.1793
ALOX15B	1.51123	4.69108	7.45772	3.79154e-13	5.20707e-12	19.1751
LSP1	0.809183	4.47489	7.45433	3.8805e-13	5.32397e-12	19.1524
SIGLEC6	0.524168	0.863803	7.45266	3.92526e-13	5.37473e-12	19.1412
ALOX5	0.874205	4.73142	7.45165	3.95239e-13	5.40655e-12	19.1344
GPC3	1.25434	3.07017	7.44963	4.00745e-13	5.47645e-12	19.1209
MR1	0.554103	3.54428	7.44791	4.05479e-13	5.53568e-12	19.1094
SLC15A1	-0.972698	1.01463	-7.44385	4.16893e-13	5.68592e-12	19.0823
SFXN3	0.598437	4.52322	7.44338	4.18212e-13	5.6975e-12	19.0792
SPIRE2	-0.702485	2.43901	-7.43531	4.41935e-13	6.00971e-12	19.0253
XPOT	-0.51397	4.19336	-7.43415	4.45431e-13	6.05119e-12	19.0176
SH3BGRL	0.551332	5.73174	7.43401	4.45858e-13	6.05119e-12	19.0167
SFTPC	2.65911	6.0285	7.43231	4.5107e-13	6.10995e-12	19.0053
GAS2L2	0.891484	1.13591	7.43103	4.5504e-13	6.15771e-12	18.9967
MTHFS	-0.524968	2.63175	-7.42856	4.6275e-13	6.25593e-12	18.9803
UBTD1	0.631906	4.78484	7.42402	4.77304e-13	6.4276e-12	18.9501
E2F2	-0.585081	1.60699	-7.42217	4.83386e-13	6.50319e-12	18.9377
FAM24B	-0.596111	1.88247	-7.41949	4.9228e-13	6.61001e-12	18.9199
GPI	-0.513404	5.54691	-7.41717	5.00141e-13	6.70257e-12	18.9044
LAPTM5	0.822184	6.76215	7.41166	5.19263e-13	6.93201e-12	18.8677
MALL	1.01654	4.0524	7.40751	5.34143e-13	7.10328e-12	18.8401
DPEP2	0.644635	2.2214	7.40261	5.52281e-13	7.33042e-12	18.8075
FBXO5	-0.524484	1.99938	-7.39947	5.64182e-13	7.47407e-12	18.7867
OGT	0.657138	4.66778	7.39639	5.76117e-13	7.62489e-12	18.7662
PLXDC2	0.724567	3.94733	7.39563	5.79128e-13	7.65742e-12	18.7611
MACROD2	0.999511	1.80555	7.39495	5.81802e-13	7.68544e-12	18.7566
KHDRBS2	0.971798	1.47732	7.3922	5.92798e-13	7.82324e-12	18.7383
EGR1	1.10006	6.2036	7.3885	6.07856e-13	7.99152e-12	18.7138
ENTPD8	-1.01055	1.72252	-7.38704	6.13947e-13	8.06395e-12	18.7041
LCP1	0.888974	5.50547	7.38423	6.25778e-13	8.19667e-12	18.6854
BCAM	0.907648	6.18263	7.38422	6.25827e-13	8.19667e-12	18.6853
OVOL2	-0.714566	3.46945	-7.37992	6.4437e-13	8.42361e-12	18.6568
PARVG	0.657848	2.66803	7.37729	6.55937e-13	8.55868e-12	18.6394
ARHGAP24	0.506289	2.22928	7.37675	6.58348e-13	8.58206e-12	18.6358
PRKAA2	-0.786076	1.62651	-7.37079	6.85529e-13	8.92798e-12	18.5963
ALDOA	-0.563117	7.60931	-7.35836	7.45774e-13	9.68528e-12	18.514
CYBB	1.04069	5.17124	7.35273	7.74754e-13	1.00428e-11	18.4768
KCNE3	-0.825983	3.55737	-7.35192	7.7901e-13	1.00885e-11	18.4714
RECQL4	-0.799882	3.11765	-7.35009	7.88735e-13	1.02045e-11	18.4593
CASP1	0.740003	3.66317	7.34996	7.89436e-13	1.02045e-11	18.4584
CLEC10A	0.896785	2.878	7.34631	8.0918e-13	1.04402e-11	18.4343
MAP2K6	-0.74002	1.51663	-7.34182	8.34081e-13	1.07415e-11	18.4047
WDR91	0.599624	3.54039	7.33867	8.5207e-13	1.09628e-11	18.3838
ATP1A2	0.681495	0.674938	7.33654	8.64436e-13	1.10912e-11	18.3698
IRF8	0.808793	3.53915	7.33588	8.6826e-13	1.113e-11	18.3655
RFTN1	0.768025	4.43348	7.33067	8.99376e-13	1.14969e-11	18.3311
MAP1LC3C	0.967803	1.8893	7.32717	9.20893e-13	1.17395e-11	18.308
CCDC34	-0.655885	2.46911	-7.32542	9.31835e-13	1.18681e-11	18.2964
AMY2B	0.777576	1.94829	7.3191	9.72437e-13	1.23398e-11	18.2548
KIF18A	-0.628136	1.41092	-7.31811	9.78939e-13	1.24109e-11	18.2483
CCL17	1.32295	2.95995	7.31682	9.87464e-13	1.25076e-11	18.2398
PAPLN	0.659295	2.97582	7.30446	1.07325e-12	1.35446e-11	18.1584
PMP22	0.707953	5.08585	7.30373	1.07855e-12	1.35991e-11	18.1536
SLC6A20	1.03891	1.31853	7.29735	1.12591e-12	1.41705e-11	18.1116
MPEG1	0.809393	4.40723	7.29611	1.13531e-12	1.42628e-11	18.1035
BEX4	0.81151	4.63217	7.29535	1.14116e-12	1.43234e-11	18.0985
USP2	0.628496	1.38663	7.2939	1.15234e-12	1.44507e-11	18.089
BTN3A3	0.577569	3.61997	7.29232	1.16467e-12	1.45911e-11	18.0786
FRZB	0.879002	3.64898	7.28786	1.20012e-12	1.50091e-11	18.0493
CD33	0.633707	1.31851	7.28392	1.23227e-12	1.53972e-11	18.0235
FRAT2	-0.550064	3.61638	-7.28293	1.24049e-12	1.54861e-11	18.017
ELN	1.05413	4.36707	7.26706	1.37996e-12	1.71192e-11	17.9129
SRMS	-0.867264	1.47835	-7.26537	1.3957e-12	1.72835e-11	17.9018
TOP2A	-0.893455	3.9868	-7.26121	1.43523e-12	1.77461e-11	17.8746
TM6SF1	0.579197	1.96054	7.26116	1.43562e-12	1.77461e-11	17.8743
CFHR3	-0.636166	0.986783	-7.25998	1.4471e-12	1.78721e-11	17.8665
BTBD11	-0.725574	0.903907	-7.2585	1.46153e-12	1.80342e-11	17.8568
FOLR2	0.974361	4.45543	7.25678	1.47839e-12	1.8226e-11	17.8456
ROR1	0.685063	1.61877	7.25552	1.49102e-12	1.83653e-11	17.8373
SORCS2	1.13579	2.57594	7.25152	1.53144e-12	1.88131e-11	17.8112
VIPR1	0.754871	2.2195	7.25112	1.5356e-12	1.88309e-11	17.8086
CHAF1B	-0.568594	2.07401	-7.24595	1.58967e-12	1.94766e-11	17.7748
MICAL2	0.692217	3.79816	7.2414	1.63879e-12	2.00253e-11	17.7451
SLCO2B1	0.876267	4.356	7.2402	1.65194e-12	2.01328e-11	17.7373
ABHD4	-0.522811	4.44018	-7.23682	1.68977e-12	2.05757e-11	17.7151
PTPRN	-0.749786	0.560356	-7.22971	1.77193e-12	2.15572e-11	17.6688
HPDL	-0.879743	1.1103	-7.22677	1.80711e-12	2.19094e-11	17.6496
SARS2	-0.500547	2.19269	-7.22676	1.8072e-12	2.19094e-11	17.6495
WDR76	-0.567194	2.17857	-7.22528	1.82521e-12	2.21083e-11	17.6399
DNALI1	1.08505	3.79167	7.2216	1.87064e-12	2.26191e-11	17.6159
PEBP4	1.52837	3.82013	7.22059	1.88319e-12	2.2751e-11	17.6093
F13A1	1.15992	4.30841	7.21978	1.8934e-12	2.28544e-11	17.604
PRAME	-1.82803	1.21909	-7.21621	1.93911e-12	2.33655e-11	17.5808
TBX4	0.781698	2.58741	7.21434	1.96347e-12	2.36179e-11	17.5686
PPT2	-0.611232	1.94202	-7.20946	2.02842e-12	2.4335e-11	17.5368
HPD	-0.614574	0.425589	-7.20717	2.05962e-12	2.46673e-11	17.5219
THEM5	-0.902438	3.56445	-7.20201	2.13156e-12	2.5507e-11	17.4884
TK1	-0.817707	4.89259	-7.1987	2.17913e-12	2.60536e-11	17.4668
AXL	0.754146	3.73688	7.19568	2.22333e-12	2.64907e-11	17.4472
BIK	-0.904143	3.5897	-7.19385	2.25063e-12	2.67929e-11	17.4353
PLEKHG2	-0.784125	3.61245	-7.19326	2.25946e-12	2.68749e-11	17.4315
HNMT	0.661218	3.99679	7.19271	2.26783e-12	2.69283e-11	17.4279
STK17A	0.578547	4.0781	7.19177	2.28201e-12	2.70735e-11	17.4218
MEGF11	0.756594	0.588703	7.19	2.30896e-12	2.7323e-11	17.4103
MGRN1	0.502228	4.32535	7.18473	2.39132e-12	2.82494e-11	17.3761
LRRN3	0.542916	0.98803	7.18426	2.39885e-12	2.83142e-11	17.373
KCNF1	-0.787028	0.65729	-7.18403	2.40257e-12	2.8334e-11	17.3715
MS4A6A	0.831571	4.18325	7.16787	2.67468e-12	3.1436e-11	17.2668
F11	0.767728	0.412041	7.16577	2.71228e-12	3.1797e-11	17.2532
TUBA1A	0.697519	5.39888	7.16331	2.75697e-12	3.22936e-11	17.2372
EID3	-0.698285	1.86877	-7.16307	2.76137e-12	3.23178e-11	17.2357
EPHA4	0.869407	2.67101	7.16006	2.81699e-12	3.29132e-11	17.2162
TLR7	0.659141	1.86294	7.15952	2.82713e-12	3.30038e-11	17.2127
LGALS2	0.985081	2.73523	7.15918	2.83347e-12	3.305e-11	17.2105
TYROBP	0.80354	7.07114	7.1533	2.94595e-12	3.43331e-11	17.1725
ITPR2	0.625264	2.65277	7.14709	3.0697e-12	3.56852e-11	17.1324
ARHGEF16	-0.648714	3.76911	-7.14019	3.21322e-12	3.72911e-11	17.0878
RBPMS2	-0.857862	1.86194	-7.13859	3.24733e-12	3.76555e-11	17.0774
RPS6KA3	0.518682	4.32646	7.13282	3.37366e-12	3.90549e-11	17.0402
RAB11FIP3	0.505429	3.66429	7.12796	3.48368e-12	4.02614e-11	17.0089
PFKFB3	0.743427	5.1655	7.12409	3.57409e-12	4.12718e-11	16.9839
AGER	1.3955	4.54184	7.12168	3.63144e-12	4.18991e-11	16.9683
HOPX	1.30401	6.07082	7.1213	3.64053e-12	4.1969e-11	16.9659
PKP3	-0.648316	5.05827	-7.11834	3.71231e-12	4.2761e-11	16.9468
GAS6	0.790084	4.61536	7.11568	3.77807e-12	4.34824e-11	16.9297
CNTN6	0.555281	0.65345	7.1066	4.01123e-12	4.60892e-11	16.8713
B3GAT1	0.805709	0.592827	7.10401	4.08019e-12	4.6804e-11	16.8546
C19orf48	-0.574448	4.19257	-7.10083	4.16675e-12	4.77179e-11	16.8342
SLC39A14	-0.647172	3.45536	-7.09817	4.24016e-12	4.84784e-11	16.8171
ARHGAP15	0.555836	1.66712	7.09789	4.24813e-12	4.85295e-11	16.8153
PTPN22	0.728215	2.361	7.09644	4.28879e-12	4.89321e-11	16.806
PRICKLE1	0.56498	1.47925	7.09638	4.29043e-12	4.89321e-11	16.8056
TM4SF19	-0.808282	0.94064	-7.09599	4.30158e-12	4.90189e-11	16.8031
TMEM117	-0.555528	1.70683	-7.09137	4.43428e-12	5.04068e-11	16.7734
INPP5D	0.693733	3.2292	7.08659	4.57601e-12	5.19326e-11	16.7427
EVI2A	0.741334	3.2447	7.08589	4.5973e-12	5.21316e-11	16.7382
DUSP13	-1.11016	0.735812	-7.08562	4.60545e-12	5.21387e-11	16.7365
RHPN2	-0.772891	3.43143	-7.08449	4.63971e-12	5.24837e-11	16.7292
DLX3	0.920107	1.73809	7.08208	4.71383e-12	5.32352e-11	16.7138
TREM2	0.937296	5.08981	7.07918	4.8045e-12	5.4215e-11	16.6952
SLC4A4	1.0057	2.81803	7.07656	4.88807e-12	5.51131e-11	16.6784
EGFR	1.01159	4.01769	7.06488	5.27764e-12	5.93125e-11	16.6036
TMEM25	0.544774	3.19472	7.05974	5.4586e-12	6.12965e-11	16.5707
SLC7A2	-1.46748	3.12937	-7.04965	5.83144e-12	6.54302e-11	16.5062
TNC	1.31739	4.55216	7.04847	5.87667e-12	6.58843e-11	16.4987
ITGA4	0.660328	1.97707	7.04535	5.99821e-12	6.71925e-11	16.4787
ETV5	0.670079	3.67862	7.03847	6.27453e-12	7.02312e-11	16.4348
CYFIP2	0.683391	3.04638	7.03667	6.34855e-12	7.10023e-11	16.4233
RXRG	0.67566	0.704477	7.03201	6.5453e-12	7.31437e-11	16.3935
TTC22	-0.564625	2.76857	-7.02842	6.70052e-12	7.4818e-11	16.3707
SCNN1B	1.19108	4.19846	7.02533	6.83702e-12	7.62542e-11	16.351
PPP2R1B	-0.506825	3.33308	-7.0246	6.86995e-12	7.64634e-11	16.3463
INCENP	-0.553559	3.05704	-7.02252	6.96386e-12	7.74464e-11	16.3331
ANGPT1	0.6883	1.64199	7.01685	7.22627e-12	8.01717e-11	16.297
DIRAS3	0.989583	1.73564	7.01427	7.34921e-12	8.14053e-11	16.2806
CCL13	1.317	4.8131	7.01264	7.42762e-12	8.22081e-11	16.2702
GLDN	0.722331	1.40655	7.00688	7.71183e-12	8.51743e-11	16.2336
STAP1	0.737702	1.7417	7.00684	7.71406e-12	8.51743e-11	16.2333
CDH17	-1.38872	1.42529	-6.9916	8.51892e-12	9.33914e-11	16.1365
CDH11	0.852508	3.95868	6.98893	8.66833e-12	9.48792e-11	16.1195
CMAS	-0.500803	4.48267	-6.9882	8.70973e-12	9.52522e-11	16.1149
FLI1	0.567648	2.53047	6.98808	8.71616e-12	9.52522e-11	16.1142
TMEM14A	-0.513346	5.07521	-6.98718	8.76734e-12	9.5736e-11	16.1085
SCD	-0.814201	5.93043	-6.98545	8.86652e-12	9.66667e-11	16.0975
RGMA	0.719797	1.34267	6.98348	8.98102e-12	9.78381e-11	16.085
DBNDD1	-0.648278	3.50888	-6.97922	9.23333e-12	1.00508e-10	16.058
ZNF165	-0.551109	2.38691	-6.97877	9.26035e-12	1.00723e-10	16.0551
NKX2-3	-0.562865	0.340396	-6.97688	9.37489e-12	1.01809e-10	16.0431
CLEC5A	0.853332	2.53431	6.96781	9.94313e-12	1.07642e-10	15.9857
GSPT2	0.737394	2.71115	6.96702	9.99415e-12	1.0811e-10	15.9807
MFNG	0.571994	3.41839	6.96464	1.015e-11	1.0971e-10	15.9657
RFX2	0.512413	2.03369	6.96393	1.01966e-11	1.10128e-10	15.9612
TTYH2	0.535042	1.93147	6.96314	1.02494e-11	1.10526e-10	15.9562
MXRA7	0.622737	3.64035	6.96285	1.02684e-11	1.10645e-10	15.9544
NOTCH2	0.58655	3.95587	6.96127	1.03743e-11	1.11699e-10	15.9443
MYO6	0.549724	4.79529	6.96018	1.04478e-11	1.12403e-10	15.9375
E2F1	-0.691997	3.6181	-6.96004	1.04577e-11	1.12422e-10	15.9365
KIF13A	0.524986	3.33683	6.95953	1.04921e-11	1.12705e-10	15.9333
RETN	1.24647	2.4017	6.95853	1.05602e-11	1.13261e-10	15.927
EXPH5	0.659923	2.90521	6.95528	1.0785e-11	1.15493e-10	15.9065
NFIB	0.631514	3.87721	6.95324	1.09285e-11	1.16939e-10	15.8936
FADS6	0.719365	0.569317	6.95262	1.09729e-11	1.17324e-10	15.8896
GSN	0.636829	5.89986	6.95239	1.09889e-11	1.17404e-10	15.8882
IL24	0.57135	1.773	6.94705	1.13758e-11	1.21351e-10	15.8545
ITGAL	0.742985	3.45775	6.94659	1.14094e-11	1.21483e-10	15.8516
GNG4	-1.15641	1.11231	-6.94206	1.17488e-11	1.24753e-10	15.823
FNDC5	0.747087	1.31791	6.93351	1.24172e-11	1.31548e-10	15.7691
GMDS	-0.62838	3.46068	-6.93083	1.26344e-11	1.33645e-10	15.7522
KCNQ5	0.696592	1.01283	6.92339	1.32562e-11	1.40115e-10	15.7053
LRIG1	0.634205	4.29955	6.92202	1.33735e-11	1.41033e-10	15.6967
BST2	0.876317	6.84748	6.91997	1.35525e-11	1.42811e-10	15.6838
BACE2	-0.934596	3.79754	-6.91379	1.41033e-11	1.48277e-10	15.645
FAS	0.758304	3.48556	6.91094	1.43655e-11	1.50919e-10	15.627
TUBB3	-0.836947	1.85936	-6.90994	1.44582e-11	1.51664e-10	15.6207
PTPRT	0.593909	0.554942	6.90434	1.49892e-11	1.56877e-10	15.5856
CACNA2D2	1.30942	3.34958	6.90318	1.51018e-11	1.57817e-10	15.5783
TSPAN4	0.610513	4.00067	6.8993	1.54839e-11	1.61689e-10	15.5539
SLC47A1	0.916734	2.02388	6.89638	1.57781e-11	1.64637e-10	15.5356
HABP2	1.45805	2.82948	6.89608	1.58084e-11	1.64828e-10	15.5337
SLC18A2	0.569068	1.03243	6.89521	1.58968e-11	1.65625e-10	15.5283
OLR1	1.02307	3.99461	6.89365	1.6058e-11	1.67179e-10	15.5184
SH3RF1	0.518474	3.9657	6.88656	1.68071e-11	1.74454e-10	15.474
FOXF2	0.770925	2.36827	6.88536	1.69374e-11	1.75674e-10	15.4665
HCLS1	0.711711	4.49741	6.88489	1.69883e-11	1.76071e-10	15.4635
RAB3B	-0.794572	0.563142	-6.88476	1.70021e-11	1.76082e-10	15.4627
CPNE2	0.508553	3.87639	6.87405	1.82139e-11	1.88116e-10	15.3956
RNPC3	0.515926	2.35366	6.87401	1.82183e-11	1.88116e-10	15.3954
PITPNC1	-0.727429	3.03971	-6.86727	1.9024e-11	1.95997e-10	15.3532
PTGES	-1.01916	4.64356	-6.86036	1.98863e-11	2.04424e-10	15.31
RAET1E	-0.629883	0.803638	-6.8584	2.0137e-11	2.06849e-10	15.2978
ENC1	0.711512	4.61393	6.85355	2.07722e-11	2.13215e-10	15.2675
ATP10A	0.772917	2.62782	6.85182	2.10042e-11	2.15437e-10	15.2567
BMP5	1.04271	2.5059	6.85147	2.10518e-11	2.15765e-10	15.2545
GPT	-0.780418	1.49027	-6.85009	2.12387e-11	2.1752e-10	15.2459
CRLS1	0.52139	4.173	6.84899	2.1388e-11	2.18887e-10	15.2391
P2RX7	0.679999	2.0871	6.84663	2.17135e-11	2.22055e-10	15.2243
CLSPN	-0.610097	1.56954	-6.84401	2.20811e-11	2.25316e-10	15.208
FAM83G	-0.521712	2.85938	-6.8436	2.21389e-11	2.25739e-10	15.2054
TTLL12	-0.543096	4.21884	-6.84249	2.22963e-11	2.26826e-10	15.1985
SVEP1	0.694654	1.88361	6.83563	2.3297e-11	2.36157e-10	15.1557
SLC25A15	-0.545002	2.58809	-6.8343	2.34951e-11	2.37991e-10	15.1475
HELLS	-0.507866	1.57121	-6.83034	2.40983e-11	2.43745e-10	15.1228
AMDHD1	-0.73592	0.678953	-6.82781	2.44904e-11	2.47349e-10	15.1071
BTNL9	0.689407	1.54685	6.82327	2.5211e-11	2.53887e-10	15.0788
LY6E	0.908711	7.11431	6.82231	2.53658e-11	2.55261e-10	15.0728
PIK3CG	0.635683	1.70588	6.8206	2.56444e-11	2.57877e-10	15.0622
ZP3	-0.749544	2.21392	-6.81129	2.72121e-11	2.73245e-10	15.0044
ALOX12P2	-0.672364	1.11238	-6.80742	2.78921e-11	2.79466e-10	14.9803
GRIN2D	-0.923942	1.86411	-6.80613	2.81228e-11	2.81573e-10	14.9723
CLECL1	0.556716	1.23749	6.80496	2.83327e-11	2.8347e-10	14.9651
PTPRO	0.553733	1.50021	6.80198	2.88762e-11	2.88076e-10	14.9466
TRIM15	-0.931111	0.435074	-6.80042	2.91641e-11	2.9053e-10	14.9369
PERP	-0.704951	5.98985	-6.79394	3.03923e-11	3.02114e-10	14.8967
CHEK2	-0.536917	2.7581	-6.79153	3.08618e-11	3.06341e-10	14.8818
GLDC	-0.918391	0.855176	-6.78494	3.21817e-11	3.18758e-10	14.841
WAS	0.624845	3.61238	6.78243	3.26978e-11	3.23407e-10	14.8255
GPR68	0.74283	3.02107	6.78195	3.27978e-11	3.24164e-10	14.8225
PRIM1	-0.554955	2.35888	-6.77892	3.34352e-11	3.29994e-10	14.8037
TMPO	-0.506285	3.91912	-6.77599	3.40636e-11	3.3548e-10	14.7856
TPPP3	1.11837	4.4243	6.77576	3.41142e-11	3.35534e-10	14.7842
LGALS9	0.706545	4.74338	6.77502	3.42736e-11	3.3683e-10	14.7796
PHYHD1	1.03477	3.30727	6.77209	3.49175e-11	3.42914e-10	14.7615
IGF1R	-0.651197	3.17509	-6.77191	3.49563e-11	3.43052e-10	14.7604
KCNMB4	-1.0456	2.44085	-6.76947	3.55029e-11	3.4817e-10	14.7453
MPZL2	0.833943	5.54696	6.76796	3.58432e-11	3.5101e-10	14.736
SPRY4	0.683113	3.94625	6.76137	3.73737e-11	3.65224e-10	14.6953
UPK1B	-1.35856	0.843944	-6.7588	3.79882e-11	3.70706e-10	14.6794
TESC	-1.67106	4.60137	-6.75287	3.94419e-11	3.84107e-10	14.6428
ZNF367	-0.509263	1.90089	-6.75285	3.94446e-11	3.84107e-10	14.6427
TNFSF11	-0.887261	1.30848	-6.74528	4.13823e-11	4.01565e-10	14.596
NLRC4	0.568041	2.12628	6.74115	4.24773e-11	4.11614e-10	14.5706
STEAP3	0.727209	4.64133	6.73989	4.28162e-11	4.14608e-10	14.5629
CNR1	0.681827	1.39803	6.73931	4.2972e-11	4.15826e-10	14.5593
LSAMP	0.571496	1.45598	6.73886	4.30943e-11	4.16718e-10	14.5566
IL27RA	0.734878	4.29581	6.73764	4.34285e-11	4.19364e-10	14.549
EDNRA	0.716009	3.60524	6.73742	4.34905e-11	4.19671e-10	14.5476
BCL2L10	-0.71234	0.969674	-6.73637	4.37779e-11	4.21954e-10	14.5412
TSPAN3	0.518317	5.85058	6.73634	4.37879e-11	4.21954e-10	14.541
FMO3	0.804019	3.09241	6.73509	4.4135e-11	4.25002e-10	14.5333
FCN1	0.814734	2.53262	6.73298	4.47281e-11	4.30415e-10	14.5203
ACP5	0.688983	6.10296	6.72916	4.58202e-11	4.39398e-10	14.4968
XRCC2	-0.560924	1.5973	-6.7282	4.60973e-11	4.41749e-10	14.4909
SAMD4A	0.640051	2.3781	6.71971	4.86327e-11	4.65082e-10	14.4388
EVL	0.508671	3.56089	6.71939	4.87305e-11	4.65696e-10	14.4368
TM4SF20	-0.70774	0.228537	-6.71633	4.96803e-11	4.74445e-10	14.4181
OLFM1	0.81397	1.67916	6.71514	5.00546e-11	4.7769e-10	14.4107
CPAMD8	1.01555	2.6159	6.71247	5.09053e-11	4.85475e-10	14.3943
KRT6A	-2.02979	2.38634	-6.70371	5.37919e-11	5.12299e-10	14.3406
RDH10	-0.995697	4.75417	-6.70216	5.43193e-11	5.16534e-10	14.3311
PLS3	0.70729	5.83884	6.70207	5.43485e-11	5.16534e-10	14.3306
BTBD16	-0.691092	0.676413	-6.69729	5.60073e-11	5.31207e-10	14.3013
KRT86	-0.773063	1.74693	-6.6946	5.6966e-11	5.39532e-10	14.2848
SELENBP1	0.95581	5.74113	6.69235	5.77764e-11	5.46117e-10	14.271
CD59	0.591924	6.42492	6.6913	5.81575e-11	5.49345e-10	14.2646
RGS18	0.616258	1.86835	6.68762	5.95184e-11	5.61052e-10	14.2421
JUP	-0.583022	6.67995	-6.68227	6.15532e-11	5.79051e-10	14.2094
IL10RA	0.654151	3.69901	6.68186	6.17098e-11	5.80131e-10	14.2069
RASL11A	0.774777	3.30141	6.68027	6.23298e-11	5.85562e-10	14.1972
ANK3	0.614611	2.05705	6.68005	6.24156e-11	5.85971e-10	14.1958
PSMG3	-0.516791	4.8159	-6.67767	6.33566e-11	5.94e-10	14.1813
KRTCAP3	-0.803506	5.76109	-6.67514	6.43701e-11	6.03094e-10	14.1658
STAC	0.846509	1.75248	6.67269	6.53647e-11	6.11586e-10	14.1509
MND1	-0.640204	1.69163	-6.67103	6.60501e-11	6.17582e-10	14.1407
FHOD1	0.559703	4.21672	6.66665	6.78879e-11	6.33483e-10	14.114
DDAH1	0.643018	4.86595	6.66129	7.02065e-11	6.53359e-10	14.0813
PLEKHA4	0.653813	3.44904	6.66061	7.05054e-11	6.55261e-10	14.0772
B3GNT7	1.04873	4.60733	6.65655	7.232e-11	6.71626e-10	14.0525
EPB41L4A	0.511322	1.87978	6.65646	7.23632e-11	6.71626e-10	14.0519
IL33	0.877477	3.73555	6.65532	7.28783e-11	6.7505e-10	14.045
RRS1	-0.521825	4.40238	-6.65442	7.3292e-11	6.78429e-10	14.0395
ADAMTSL2	0.685153	3.21068	6.64634	7.70913e-11	7.12169e-10	13.9903
CSF2	1.02025	1.97696	6.63616	8.21522e-11	7.57407e-10	13.9284
KLK6	-1.53901	1.12794	-6.62356	8.88704e-11	8.17172e-10	13.8519
CENPK	-0.576557	1.42029	-6.62318	8.90818e-11	8.18572e-10	13.8496
IKZF3	0.617753	2.64851	6.61952	9.11341e-11	8.36876e-10	13.8274
DLEC1	0.657635	1.24095	6.61702	9.25675e-11	8.49475e-10	13.8122
PI16	0.690026	0.711267	6.61664	9.27876e-11	8.50932e-10	13.8099
PRELP	0.885038	4.48274	6.61004	9.66755e-11	8.84246e-10	13.7699
PDE10A	-0.712492	0.930577	-6.60928	9.71347e-11	8.8786e-10	13.7653
OMG	0.732006	1.17277	6.60559	9.93887e-11	9.07864e-10	13.743
LIPA	0.668306	5.39608	6.60274	1.01168e-10	9.22899e-10	13.7257
SPTLC3	0.784861	1.71347	6.60169	1.01829e-10	9.28323e-10	13.7194
PIK3R5	0.543515	2.29638	6.60091	1.02327e-10	9.31305e-10	13.7146
TRIB3	-0.683054	3.61213	-6.58196	1.15106e-10	1.0391e-09	13.6001
TIAM1	0.551888	2.03329	6.56576	1.27257e-10	1.14432e-09	13.5025
PTGFR	0.682954	0.799576	6.56429	1.28417e-10	1.154e-09	13.4937
HLA-DOB	0.73426	3.11817	6.56397	1.28679e-10	1.15561e-09	13.4917
IL7R	0.876034	4.13863	6.55992	1.31938e-10	1.18258e-09	13.4674
SLC27A1	0.516642	3.17059	6.55864	1.32991e-10	1.19048e-09	13.4596
GINS4	-0.595435	1.49873	-6.55641	1.34835e-10	1.20542e-09	13.4462
CHAC2	-0.582648	2.19514	-6.5546	1.3635e-10	1.21818e-09	13.4354
PI3	-1.44604	2.65706	-6.54668	1.43188e-10	1.27271e-09	13.3877
MRC2	0.653072	4.69313	6.53657	1.52413e-10	1.34865e-09	13.327
TRAF3IP3	0.611699	2.00179	6.53385	1.54987e-10	1.36967e-09	13.3107
MYO1F	0.566466	3.20508	6.53282	1.55979e-10	1.37668e-09	13.3045
PPP1R14C	1.15101	3.43411	6.52838	1.60304e-10	1.41396e-09	13.2779
SLC9A9	0.532669	2.29017	6.52718	1.61493e-10	1.42354e-09	13.2707
KRT8	-0.662617	7.48111	-6.52545	1.6322e-10	1.43785e-09	13.2604
PRDM16	0.883519	1.80599	6.52477	1.63905e-10	1.44297e-09	13.2563
SDC1	0.67189	7.59929	6.52097	1.6779e-10	1.4753e-09	13.2335
CA8	-0.885186	1.04492	-6.51886	1.69981e-10	1.49361e-09	13.2209
PLCD3	-0.710134	2.38599	-6.51838	1.70486e-10	1.4971e-09	13.218
SPTB	1.03384	1.82382	6.51515	1.73905e-10	1.52616e-09	13.1987
GJB3	-1.29458	2.36444	-6.51501	1.74057e-10	1.52652e-09	13.1978
RNF19A	0.592269	4.74686	6.51057	1.78874e-10	1.5658e-09	13.1713
RCOR2	-0.800391	1.97337	-6.50944	1.80128e-10	1.57478e-09	13.1645
LCP2	0.62218	3.49491	6.50647	1.83439e-10	1.60171e-09	13.1468
SOX15	-0.782257	1.73596	-6.50378	1.86493e-10	1.62735e-09	13.1307
EMP2	0.671454	5.10852	6.50238	1.88106e-10	1.63833e-09	13.1224
GMNN	-0.523875	3.19704	-6.50188	1.88687e-10	1.64169e-09	13.1194
TIPARP	0.794437	4.20773	6.50142	1.89219e-10	1.64493e-09	13.1166
CD22	0.721213	1.93102	6.50064	1.90134e-10	1.65185e-09	13.1119
PLEK	0.810055	4.44975	6.49743	1.93914e-10	1.68257e-09	13.0928
MRPL12	-0.560861	4.83907	-6.49688	1.94574e-10	1.68618e-09	13.0895
ATP8A1	0.750143	3.15329	6.49351	1.98638e-10	1.71925e-09	13.0694
BOP1	-0.598715	4.5083	-6.49293	1.99343e-10	1.72428e-09	13.0659
WDHD1	-0.538861	1.97891	-6.49072	2.0206e-10	1.7456e-09	13.0528
CDH24	-0.700289	3.16029	-6.49049	2.02354e-10	1.74706e-09	13.0513
REN	0.550484	0.824974	6.48559	2.08525e-10	1.79844e-09	13.0221
HNF1A	-0.748538	0.619008	-6.48555	2.08566e-10	1.79844e-09	13.0219
CEACAM8	0.558321	0.636929	6.4776	2.18981e-10	1.88471e-09	12.9746
LRRC31	1.10869	1.73436	6.47165	2.27096e-10	1.95094e-09	12.9392
PECAM1	0.516082	5.49148	6.47138	2.27483e-10	1.95306e-09	12.9375
DOK4	0.736136	4.15895	6.47123	2.27682e-10	1.95356e-09	12.9367
GYPC	0.557321	3.29292	6.46874	2.3118e-10	1.98111e-09	12.9218
PRAM1	0.610516	2.15506	6.46624	2.3474e-10	2.0079e-09	12.907
TP53I3	-0.582457	4.82347	-6.46448	2.37287e-10	2.02718e-09	12.8965
MTSS1	0.719994	3.43586	6.45909	2.45226e-10	2.09243e-09	12.8645
SLC15A3	0.648017	4.14193	6.45764	2.47406e-10	2.10843e-09	12.8559
VSIG2	1.30088	4.07488	6.45249	2.55306e-10	2.17308e-09	12.8253
C14orf132	0.672212	1.95189	6.45141	2.57005e-10	2.1862e-09	12.8189
LBP	-1.10287	0.830963	-6.44814	2.62176e-10	2.22745e-09	12.7995
MMP24	0.809954	2.84779	6.44458	2.67943e-10	2.27227e-09	12.7784
RCSD1	0.60864	2.7151	6.44023	2.75133e-10	2.32613e-09	12.7526
HMCN1	0.656472	1.98957	6.43598	2.82346e-10	2.38566e-09	12.7275
TACC1	0.55754	3.87417	6.43107	2.90929e-10	2.45368e-09	12.6983
TEKT2	0.98899	1.9391	6.42954	2.93638e-10	2.47502e-09	12.6893
PLAT	1.18808	4.1254	6.42917	2.94304e-10	2.47913e-09	12.6871
AP1S2	0.546356	2.67351	6.42691	2.98392e-10	2.51051e-09	12.6737
GIMAP2	0.657478	3.2937	6.42411	3.03509e-10	2.55047e-09	12.6572
EGLN3	-1.04002	3.30699	-6.4229	3.05756e-10	2.56779e-09	12.65
SPON1	0.871855	4.18986	6.42093	3.09435e-10	2.59555e-09	12.6384
OLFML3	0.830216	4.62232	6.41829	3.14437e-10	2.6359e-09	12.6228
IL6R	0.593273	4.04436	6.41812	3.14764e-10	2.63706e-09	12.6218
PRRT2	0.666192	1.38837	6.41593	3.18987e-10	2.67082e-09	12.6088
TBL1X	-0.564188	3.4171	-6.41322	3.24287e-10	2.71192e-09	12.5928
CDX2	-0.613646	0.439526	-6.41238	3.25932e-10	2.72403e-09	12.5879
PLEKHG6	-0.682255	2.69037	-6.41177	3.27141e-10	2.73249e-09	12.5843
IGFBP7	0.624385	7.13071	6.41121	3.2827e-10	2.74027e-09	12.581
CASC1	0.675188	1.34441	6.4086	3.33505e-10	2.78062e-09	12.5656
DDX11	-0.535164	2.58273	-6.40388	3.43204e-10	2.85289e-09	12.5377
ALPL	1.26282	4.87032	6.40225	3.46602e-10	2.87941e-09	12.5282
KLHL6	0.615619	2.13757	6.39947	3.52509e-10	2.92323e-09	12.5117
MAGEA3	-1.65464	0.661464	-6.39458	3.63111e-10	3.00755e-09	12.4829
SNCG	-1.26741	4.02951	-6.39421	3.63925e-10	3.01249e-09	12.4808
C1QTNF6	-0.637923	2.982	-6.39054	3.72103e-10	3.07135e-09	12.4592
DAAM2	0.788036	2.62743	6.38764	3.78694e-10	3.12355e-09	12.4421
PITX1	-1.14567	2.33192	-6.3853	3.84104e-10	3.1644e-09	12.4283
NDN	0.692853	3.644	6.37573	4.06998e-10	3.34308e-09	12.372
GCH1	-0.521597	3.50029	-6.37332	4.1296e-10	3.3887e-09	12.3579
NEDD9	0.748688	4.24304	6.37329	4.13041e-10	3.3887e-09	12.3577
IVL	1.44009	1.8382	6.36856	4.24997e-10	3.48266e-09	12.33
TPPP	0.81739	2.57142	6.36633	4.30777e-10	3.52378e-09	12.3169
IRX1	0.905841	1.07032	6.36599	4.31646e-10	3.5288e-09	12.3149
TBX5	0.590573	2.51333	6.3654	4.33201e-10	3.53943e-09	12.3114
CEACAM21	0.569506	1.8846	6.35944	4.49064e-10	3.66687e-09	12.2765
CHD7	-0.54411	2.28938	-6.35845	4.51758e-10	3.68669e-09	12.2707
EGF	-0.854579	1.83224	-6.35604	4.58359e-10	3.73793e-09	12.2566
PNMA2	0.886686	2.8775	6.35586	4.58864e-10	3.73808e-09	12.2555
HGF	0.611304	1.64982	6.35514	4.60845e-10	3.75201e-09	12.2513
DNER	-1.00191	1.02994	-6.35493	4.61431e-10	3.75458e-09	12.2501
SGK2	-0.739049	1.30042	-6.34988	4.75709e-10	3.86395e-09	12.2205
OLFML1	0.544544	2.66045	6.34442	4.91616e-10	3.98614e-09	12.1885
SUSD3	0.630042	2.91597	6.34417	4.92348e-10	3.98975e-09	12.1871
VWA3A	0.694749	0.821754	6.34361	4.94002e-10	4.00081e-09	12.1838
GPR162	0.586814	1.75762	6.3434	4.94632e-10	4.00167e-09	12.1826
ITM2A	0.722119	3.41923	6.34338	4.94686e-10	4.00167e-09	12.1825
DDO	0.627969	1.65739	6.34233	4.9783e-10	4.02241e-09	12.1763
SAMD13	-0.563022	0.890321	-6.338	5.10959e-10	4.12368e-09	12.151
APOBEC2	0.754831	1.0006	6.33689	5.1439e-10	4.14896e-09	12.1445
PLA2G4F	0.765527	2.1217	6.3316	5.31032e-10	4.26827e-09	12.1136
ZEB2	0.53344	2.41342	6.33004	5.3604e-10	4.30604e-09	12.1045
SDC2	0.687693	3.74158	6.32938	5.38152e-10	4.3205e-09	12.1006
SLC27A3	0.533443	3.66271	6.327	5.45911e-10	4.38025e-09	12.0867
STEAP4	1.05621	4.59936	6.32464	5.53717e-10	4.43517e-09	12.073
MYO1E	-0.552844	3.61441	-6.31526	5.85761e-10	4.67832e-09	12.0183
MFSD3	-0.634913	4.04038	-6.31111	6.00539e-10	4.79083e-09	11.9941
GIMAP4	0.626182	5.00106	6.30263	6.31829e-10	5.02021e-09	11.9448
HAVCR1	-0.951241	1.16143	-6.29772	6.50682e-10	5.15523e-09	11.9162
FGR	0.648317	3.73766	6.29561	6.5897e-10	5.21791e-09	11.9039
ZFP42	-0.933094	0.568895	-6.29431	6.64083e-10	5.2554e-09	11.8964
ADA	-0.591557	2.156	-6.29251	6.713e-10	5.30948e-09	11.8859
BANK1	0.647106	2.80458	6.29084	6.78045e-10	5.35671e-09	11.8762
SMARCA4	0.530701	4.36438	6.28886	6.8609e-10	5.41718e-09	11.8648
TUB	0.518328	1.32319	6.2884	6.88003e-10	5.42919e-09	11.862
ADPRHL1	-0.69695	2.24695	-6.28663	6.95306e-10	5.48058e-09	11.8518
TPSD1	0.908414	1.57028	6.28622	6.97003e-10	5.49083e-09	11.8494
COL4A4	0.754324	2.77057	6.28507	7.01817e-10	5.52561e-09	11.8427
FCRL1	0.531097	0.866408	6.28461	7.03753e-10	5.53771e-09	11.8401
CMTM3	0.570845	4.64171	6.28235	7.13308e-10	5.60971e-09	11.827
PLEKHG1	0.523137	3.17066	6.28115	7.18453e-10	5.64697e-09	11.82
DQX1	-0.681409	0.476021	-6.2793	7.26429e-10	5.70319e-09	11.8093
SKP2	-0.533077	2.78844	-6.27687	7.37044e-10	5.77671e-09	11.7952
AKR7A3	-1.287	2.23803	-6.27514	7.4471e-10	5.83349e-09	11.7851
BAG1	-0.52398	4.24844	-6.2708	7.64218e-10	5.98292e-09	11.76
SLC9A2	-0.69022	0.60166	-6.26363	7.97617e-10	6.20582e-09	11.7185
GDF5	0.596269	0.703436	6.25979	8.16071e-10	6.33873e-09	11.6963
B4GALNT1	-0.711141	0.943546	-6.25718	8.28854e-10	6.42721e-09	11.6812
LYZ	1.14351	7.57054	6.2566	8.31712e-10	6.44577e-09	11.6778
EZH2	-0.53262	2.7162	-6.25646	8.32394e-10	6.44711e-09	11.6771
GPR65	0.600663	2.31115	6.25532	8.38091e-10	6.48432e-09	11.6704
OCLN	0.666783	3.38704	6.25486	8.40355e-10	6.49459e-09	11.6678
PPEF1	-0.571244	0.746507	-6.24834	8.73602e-10	6.72902e-09	11.6301
RAB36	0.676271	2.63046	6.2478	8.76401e-10	6.74683e-09	11.627
HHLA2	1.56589	2.04464	6.24399	8.96508e-10	6.89396e-09	11.605
SLC44A5	-0.948961	1.86726	-6.24209	9.06694e-10	6.96842e-09	11.594
ID1	-0.960462	5.22955	-6.24133	9.10782e-10	6.99596e-09	11.5897
ATP1B1	-0.798498	7.75284	-6.23518	9.44655e-10	7.23609e-09	11.5542
CLEC7A	0.717095	3.47991	6.23263	9.5909e-10	7.3426e-09	11.5395
CSF2RB	0.616633	3.18966	6.22876	9.81374e-10	7.50905e-09	11.5172
GRTP1	-0.56416	2.98163	-6.22843	9.83269e-10	7.5194e-09	11.5153
CHPT1	-0.602101	3.02355	-6.22726	9.90127e-10	7.5635e-09	11.5086
ZNF502	0.584958	2.22863	6.22672	9.93323e-10	7.58373e-09	11.5055
PTGER2	0.734828	2.18418	6.22367	1.0114e-09	7.71325e-09	11.4879
CD84	0.653029	2.71399	6.22291	1.01601e-09	7.73986e-09	11.4835
ASF1B	-0.560886	3.42061	-6.22129	1.02581e-09	7.80594e-09	11.4742
PTP4A1	-0.599798	5.87971	-6.21903	1.03961e-09	7.89795e-09	11.4612
CD28	0.565444	1.21015	6.21573	1.06017e-09	8.0497e-09	11.4422
COL8A2	0.794368	3.58829	6.21482	1.06587e-09	8.08414e-09	11.437
TDRD5	-0.814851	1.08695	-6.21461	1.06719e-09	8.08977e-09	11.4358
ARL14	-1.17267	1.11133	-6.21196	1.08409e-09	8.21335e-09	11.4206
WFDC2	1.07793	8.0989	6.21183	1.08493e-09	8.21387e-09	11.4198
AZU1	0.600949	0.65888	6.20604	1.12273e-09	8.48292e-09	11.3866
RGN	0.713719	2.11085	6.20487	1.13054e-09	8.53702e-09	11.3799
HNF4A	-0.873258	0.643453	-6.20433	1.13413e-09	8.55507e-09	11.3768
ARMC9	0.580339	2.48138	6.20256	1.14606e-09	8.63566e-09	11.3666
ATP2B1	-0.536991	3.09502	-6.20222	1.14837e-09	8.64835e-09	11.3647
FAM107A	0.768665	2.26781	6.20134	1.15435e-09	8.68391e-09	11.3596
CYB5A	0.693842	4.70244	6.19999	1.16362e-09	8.74895e-09	11.3519
LAT2	0.557936	3.16512	6.19881	1.17177e-09	8.80545e-09	11.3451
CTTNBP2	0.514396	0.372392	6.19487	1.19936e-09	9.003e-09	11.3225
LBH	0.577082	5.67294	6.19458	1.20139e-09	9.01335e-09	11.3209
SLA	0.591611	3.33146	6.19288	1.21351e-09	9.09445e-09	11.3111
KRT7	-0.868916	7.49935	-6.19246	1.21651e-09	9.11198e-09	11.3087
CXCR4	0.695024	5.67304	6.18305	1.28599e-09	9.59613e-09	11.2548
MAP2	-0.874024	2.53707	-6.17858	1.32029e-09	9.83084e-09	11.2293
STK39	0.564199	4.39458	6.17726	1.33062e-09	9.90249e-09	11.2217
RGS11	0.575618	1.30986	6.1741	1.35558e-09	1.00774e-08	11.2037
ECHDC2	0.51077	3.58799	6.1737	1.35878e-09	1.00958e-08	11.2014
SCGB1A1	2.28533	5.26925	6.17249	1.36855e-09	1.01575e-08	11.1944
MGST1	-0.712927	5.43727	-6.17008	1.38812e-09	1.02972e-08	11.1807
F7	-0.63742	0.430451	-6.16825	1.40316e-09	1.03976e-08	11.1702
CTSZ	0.502284	7.87606	6.16696	1.41381e-09	1.04654e-08	11.1629
AKAP12	-0.950574	2.64963	-6.16682	1.41496e-09	1.04683e-08	11.1621
SPATA18	0.81012	2.06861	6.16463	1.43331e-09	1.05871e-08	11.1496
IGSF10	0.624696	0.520406	6.16374	1.44082e-09	1.0635e-08	11.1445
KCNE4	-1.00993	2.64584	-6.16368	1.44133e-09	1.0635e-08	11.1442
BARX1	-1.66896	1.91763	-6.16346	1.44321e-09	1.06432e-08	11.1429
NCAM2	0.568085	1.04242	6.15833	1.48741e-09	1.09575e-08	11.1136
ENPP1	-0.603785	0.796623	-6.15545	1.51281e-09	1.11387e-08	11.0972
PDZD4	0.581719	1.24549	6.15062	1.55632e-09	1.14469e-08	11.0697
ARHGAP9	0.612233	3.07335	6.14962	1.56546e-09	1.1508e-08	11.064
ODC1	-1.02108	5.76203	-6.14656	1.59388e-09	1.16859e-08	11.0466
PPIL6	0.630041	1.67951	6.14614	1.59778e-09	1.17083e-08	11.0442
LMOD1	0.653494	3.17559	6.14481	1.61034e-09	1.17879e-08	11.0366
AGRP	0.574474	1.12493	6.14246	1.63267e-09	1.19451e-08	11.0232
IL20RB	-1.17932	1.83758	-6.13406	1.71505e-09	1.25015e-08	10.9755
FST	-1.05335	1.25848	-6.13358	1.71988e-09	1.25302e-08	10.9727
CTSS	0.617086	6.48834	6.11553	1.91152e-09	1.38826e-08	10.8703
CA11	0.652576	3.47575	6.11363	1.93277e-09	1.40222e-08	10.8595
HERC6	0.592725	3.3641	6.11152	1.95683e-09	1.41745e-08	10.8475
ZNF486	0.995306	2.53337	6.10993	1.97502e-09	1.42838e-08	10.8386
RUNX3	0.629106	3.14586	6.10857	1.99082e-09	1.43831e-08	10.8308
CHAD	0.813688	1.79265	6.10566	2.02492e-09	1.46211e-08	10.8144
COL8A1	0.782001	4.47445	6.10558	2.02588e-09	1.46211e-08	10.8139
COL13A1	0.572812	1.60618	6.09968	2.0968e-09	1.51172e-08	10.7805
STC1	-0.86393	3.15463	-6.09916	2.10311e-09	1.5147e-08	10.7776
TGFBR3	0.590766	1.83173	6.09195	2.19344e-09	1.57484e-08	10.7368
ATAD2	-0.571729	3.09686	-6.08538	2.2789e-09	1.63113e-08	10.6998
STOM	0.544208	6.48862	6.08095	2.33848e-09	1.67205e-08	10.6748
ARMCX1	0.548117	3.233	6.08039	2.34614e-09	1.67666e-08	10.6716
CCNJL	0.779215	3.95979	6.07505	2.42004e-09	1.72614e-08	10.6415
CCDC69	0.564918	3.87908	6.07468	2.42534e-09	1.72881e-08	10.6394
STARD10	-0.609782	5.12898	-6.07358	2.44087e-09	1.73898e-08	10.6332
CCR7	0.779426	3.21802	6.06916	2.50439e-09	1.78148e-08	10.6083
BFSP1	-0.507653	1.53952	-6.06865	2.51179e-09	1.78492e-08	10.6054
GIMAP7	0.646676	4.53155	6.06451	2.57288e-09	1.82365e-08	10.5821
KCND2	-0.584599	1.20663	-6.06229	2.60623e-09	1.8454e-08	10.5696
GCNT3	-1.28469	3.13546	-6.06152	2.6179e-09	1.85272e-08	10.5653
EIF4EBP1	-0.678427	5.20209	-6.05923	2.65284e-09	1.87578e-08	10.5525
TLE2	0.638896	4.35026	6.05107	2.7814e-09	1.96241e-08	10.5066
BMP6	-1.05761	2.15106	-6.04312	2.91249e-09	2.04761e-08	10.4619
ZSCAN18	0.551302	2.69281	6.043	2.9144e-09	2.04791e-08	10.4613
TRAF1	0.50021	2.96896	6.04234	2.92563e-09	2.05372e-08	10.4576
GCNT4	0.502964	1.11168	6.03847	2.99179e-09	2.09804e-08	10.4359
ANKS4B	-0.849348	0.679646	-6.03541	3.0453e-09	2.1334e-08	10.4187
CCL28	0.836206	2.0368	6.02411	3.25073e-09	2.27158e-08	10.3554
MAF	0.521013	3.17532	6.02387	3.25518e-09	2.27354e-08	10.3541
LRMP	0.628667	1.85205	6.02342	3.26361e-09	2.27828e-08	10.3516
CLUL1	0.598099	1.03774	6.02281	3.2752e-09	2.28522e-08	10.3482
CHODL	-0.711063	1.19295	-6.02098	3.30999e-09	2.30833e-08	10.3379
PIM3	-0.501139	6.19034	-6.01788	3.36956e-09	2.34869e-08	10.3206
S100A12	-0.751056	1.49668	-6.01533	3.41954e-09	2.38233e-08	10.3064
PDE6B	0.591955	1.86157	6.01058	3.51454e-09	2.44238e-08	10.2798
DTX3	0.51222	3.56504	6.00852	3.55638e-09	2.47021e-08	10.2683
SYT5	-0.520395	0.491137	-6.00803	3.56638e-09	2.47592e-08	10.2656
ZNF626	0.665915	1.6496	6.00535	3.62187e-09	2.51067e-08	10.2507
DNAJC15	-0.590299	3.17311	-6.00311	3.66896e-09	2.54077e-08	10.2381
DKK1	-1.42648	1.37581	-5.99293	3.89018e-09	2.68993e-08	10.1814
FBLN1	0.721087	4.92971	5.98734	4.0172e-09	2.77085e-08	10.1503
CD82	0.598535	4.88888	5.98363	4.10368e-09	2.82768e-08	10.1296
DHCR7	-0.515168	4.46088	-5.98295	4.11978e-09	2.83737e-08	10.1258
NHS	0.650977	1.94218	5.98187	4.14538e-09	2.85358e-08	10.1198
IRX6	0.873604	1.25323	5.98085	4.16963e-09	2.86885e-08	10.1142
GABRE	0.900017	2.22307	5.9798	4.19475e-09	2.8847e-08	10.1084
P2RY14	0.51097	2.14051	5.97966	4.19812e-09	2.88558e-08	10.1076
PLXNA2	0.684812	3.46	5.97776	4.24433e-09	2.9159e-08	10.097
ZMYND10	0.872018	1.91834	5.975	4.31198e-09	2.94921e-08	10.0817
BCL2	0.613196	2.06975	5.97094	4.41335e-09	3.01409e-08	10.0591
SCUBE3	0.858273	2.02003	5.96934	4.45402e-09	3.04036e-08	10.0503
CCL19	1.15313	5.55907	5.96514	4.56256e-09	3.10833e-08	10.0269
E2F7	-0.526167	0.91878	-5.95841	4.74173e-09	3.22563e-08	9.98961
DNAH11	0.68804	1.39402	5.9565	4.79397e-09	3.25718e-08	9.979
TUBAL3	-0.552486	0.501491	-5.95467	4.84435e-09	3.28737e-08	9.96887
SIGLEC1	0.737641	3.09922	5.94984	4.97991e-09	3.37276e-08	9.94214
EBF4	0.625464	2.95081	5.9491	5.00096e-09	3.38371e-08	9.93805
AMBP	-1.19948	0.899956	-5.94893	5.0058e-09	3.38533e-08	9.93711
AMOT	0.834828	2.32925	5.9474	5.04968e-09	3.41333e-08	9.92866
SDC3	0.535081	4.67089	5.94689	5.0645e-09	3.42105e-08	9.92582
PID1	0.753675	3.00488	5.94684	5.06603e-09	3.42105e-08	9.92553
SPSB2	-0.59988	4.13152	-5.94246	5.19427e-09	3.50423e-08	9.90131
TINAG	-0.746348	0.670059	-5.94089	5.24098e-09	3.53402e-08	9.89264
MLLT11	-0.812224	2.20371	-5.93749	5.34358e-09	3.60146e-08	9.87386
MYLK	0.589093	3.32248	5.93735	5.34793e-09	3.60264e-08	9.87308
C3AR1	0.687856	4.18976	5.92794	5.64257e-09	3.79743e-08	9.82113
MT1E	0.928737	4.98341	5.9247	5.74758e-09	3.86435e-08	9.80328
CCL23	0.704543	1.96606	5.9169	6.00871e-09	4.036e-08	9.76025
KCNC3	0.503776	2.33899	5.91403	6.10738e-09	4.09632e-08	9.74447
POF1B	-1.05165	2.2092	-5.91075	6.22255e-09	4.17155e-08	9.72638
CD86	0.622386	3.66731	5.9105	6.2312e-09	4.17532e-08	9.72504
KRT81	-1.3118	2.0456	-5.90517	6.42281e-09	4.29334e-08	9.69571
DOCK5	-0.570416	2.66414	-5.90107	6.57409e-09	4.39234e-08	9.67317
CXCL12	0.737316	3.3454	5.89915	6.64623e-09	4.4384e-08	9.6626
SOCS1	0.596123	3.67793	5.89233	6.90809e-09	4.60661e-08	9.62518
TNS4	-1.3521	2.41976	-5.89208	6.91797e-09	4.61098e-08	9.6238
KLF8	0.50979	1.917	5.89169	6.93346e-09	4.61908e-08	9.62163
CKS2	-0.59494	5.20426	-5.89106	6.95793e-09	4.63316e-08	9.61822
NINJ2	0.675153	3.68164	5.88583	7.16724e-09	4.76795e-08	9.58953
PPP1R12B	0.51647	2.83338	5.88483	7.20817e-09	4.78976e-08	9.58402
ABI3	0.510655	3.70164	5.88477	7.21039e-09	4.78976e-08	9.58372
ACSL5	0.832788	5.77219	5.88376	7.25177e-09	4.81263e-08	9.57818
LHFPL3	0.582306	0.773902	5.88344	7.26499e-09	4.8191e-08	9.57641
PARP15	0.599107	2.00511	5.88293	7.28581e-09	4.83059e-08	9.57364
LMO2	0.501595	2.89069	5.88117	7.35914e-09	4.86989e-08	9.56395
MYBPH	1.10417	1.34352	5.87987	7.41332e-09	4.89873e-08	9.55685
LRFN4	-0.701241	3.13191	-5.87668	7.54817e-09	4.98309e-08	9.53939
SNTB1	0.653052	4.13011	5.86948	7.8617e-09	5.17774e-08	9.5
GCKR	-0.572897	0.382085	-5.86908	7.87969e-09	5.18409e-08	9.49778
LAIR1	0.633756	3.28237	5.86793	7.93088e-09	5.21091e-08	9.49152
GDA	-0.679158	0.0499761	-5.86747	7.95169e-09	5.21964e-08	9.48898
NPR1	0.60956	2.31954	5.86587	8.02385e-09	5.26451e-08	9.48023
YBX2	-0.864798	1.2753	-5.8648	8.07239e-09	5.29385e-08	9.4744
ITIH5	0.605555	1.71334	5.86393	8.11212e-09	5.31739e-08	9.46964
PLCH1	0.599269	2.91044	5.84621	8.96472e-09	5.8541e-08	9.37291
TNFRSF14	0.537704	4.31319	5.84083	9.24057e-09	6.02289e-08	9.34358
TRPV2	0.568117	3.62499	5.83556	9.51822e-09	6.1922e-08	9.31493
C4BPA	1.48204	5.90459	5.83242	9.68782e-09	6.29073e-08	9.29784
RPS6KA2	0.571481	4.67209	5.83072	9.78073e-09	6.33918e-08	9.2886
CCDC8	0.668544	2.4462	5.8294	9.85367e-09	6.38048e-08	9.28141
FXYD3	-1.05954	4.91748	-5.82872	9.8914e-09	6.40192e-08	9.27772
SLC1A1	0.80944	2.85496	5.82736	9.96722e-09	6.43896e-08	9.27033
ENPP5	0.668997	3.66038	5.82414	1.01491e-08	6.55034e-08	9.25283
RGS10	0.571243	4.9292	5.8239	1.0163e-08	6.55624e-08	9.25151
BEX5	0.82823	2.47884	5.82336	1.0194e-08	6.57324e-08	9.24855
MANSC1	-0.576875	3.46504	-5.81832	1.04864e-08	6.74602e-08	9.2212
KCND3	0.523818	1.37504	5.80931	1.10293e-08	7.07836e-08	9.17236
CADPS2	0.520199	4.19395	5.80924	1.10336e-08	7.07836e-08	9.17198
DTX4	0.609635	4.31161	5.80753	1.11402e-08	7.13025e-08	9.16267
RAB38	0.688144	3.5286	5.80235	1.14677e-08	7.32297e-08	9.13464
AQP5	1.76923	4.10147	5.80158	1.15176e-08	7.34804e-08	9.13044
HYAL1	-0.844285	2.79562	-5.80105	1.15514e-08	7.36618e-08	9.12761
CEBPA	0.741866	3.74306	5.79847	1.17195e-08	7.46999e-08	9.11363
ARHGEF19	0.588688	4.01522	5.78783	1.24375e-08	7.89099e-08	9.05611
PLOD2	-0.803819	4.06766	-5.78776	1.24427e-08	7.89099e-08	9.0557
DNAJB4	-0.542381	2.8469	-5.78749	1.24613e-08	7.89919e-08	9.05426
AK1	0.588727	3.5792	5.78244	1.28181e-08	8.1142e-08	9.02695
SEMA5A	0.62468	1.84975	5.78037	1.29664e-08	8.2006e-08	9.01582
VNN1	-0.894847	1.83111	-5.77691	1.32196e-08	8.33411e-08	8.99712
CTF1	0.604025	3.32054	5.77261	1.35403e-08	8.52469e-08	8.97393
TRIM7	-0.518546	0.609192	-5.77232	1.3562e-08	8.53443e-08	8.97239
KLHDC7A	0.74905	2.12409	5.77002	1.37371e-08	8.6385e-08	8.95998
MAOB	0.737539	3.40657	5.76622	1.40312e-08	8.80971e-08	8.93949
CD48	0.732848	3.68991	5.75714	1.47583e-08	9.243e-08	8.89063
CLDN18	1.4421	3.08747	5.756	1.48516e-08	9.28693e-08	8.88453
SFTPB	1.62642	9.96955	5.75573	1.48744e-08	9.297e-08	8.88305
OPLAH	-0.632511	3.63216	-5.74039	1.61967e-08	1.00826e-07	8.80069
TRIB1	0.550712	5.52626	5.74031	1.6204e-08	1.00826e-07	8.80026
BCHE	0.619152	0.752291	5.73534	1.66569e-08	1.03504e-07	8.7736
KCTD14	0.739129	2.59283	5.73427	1.67559e-08	1.04073e-07	8.76787
LTBP4	0.607875	4.27387	5.73175	1.69919e-08	1.05397e-07	8.75435
NFAM1	0.547543	2.55301	5.73144	1.70209e-08	1.0551e-07	8.75271
TYMS	-0.557416	3.25318	-5.73139	1.70253e-08	1.0551e-07	8.75246
AKAP14	0.691083	0.872061	5.73051	1.7109e-08	1.05886e-07	8.74771
C1QB	0.784464	7.81225	5.72684	1.74604e-08	1.08013e-07	8.72806
PAM	0.509307	5.21327	5.726	1.75415e-08	1.08466e-07	8.72358
B3GNT5	-0.580092	3.2528	-5.72433	1.77041e-08	1.09325e-07	8.71466
FCER1G	0.626869	6.09611	5.723	1.78348e-08	1.10034e-07	8.70755
NXN	0.534288	4.19914	5.72134	1.79996e-08	1.10853e-07	8.69865
EFCAB1	0.792748	1.23438	5.71998	1.81361e-08	1.11645e-07	8.69135
PSCA	-1.45537	2.07435	-5.70856	1.93174e-08	1.18077e-07	8.63035
PSAT1	-0.810076	3.37653	-5.70775	1.94035e-08	1.18551e-07	8.62605
DAPP1	0.615466	2.92064	5.7065	1.95388e-08	1.19325e-07	8.61933
PLA2G12B	1.09958	1.5615	5.70577	1.96168e-08	1.19749e-07	8.61548
ARID3A	-0.507473	2.29307	-5.70381	1.98308e-08	1.21002e-07	8.60499
IRX5	0.942426	3.10833	5.70297	1.99226e-08	1.21455e-07	8.60053
SLC39A5	-0.659232	0.480006	-5.70256	1.99682e-08	1.21679e-07	8.59832
SERPING1	0.558372	7.01345	5.7023	1.99965e-08	1.21799e-07	8.59695
ADRB1	0.724786	1.55817	5.6994	2.03184e-08	1.23596e-07	8.58151
PCSK9	-0.96236	1.44929	-5.69831	2.0441e-08	1.24288e-07	8.5757
IGFBP4	0.539379	7.58204	5.69262	2.10928e-08	1.27913e-07	8.54536
THPO	-0.817026	1.2802	-5.6899	2.14107e-08	1.29785e-07	8.5309
KRT6B	-1.07419	1.02785	-5.68972	2.14326e-08	1.29804e-07	8.52992
MARCO	1.15341	5.22601	5.68777	2.16639e-08	1.3109e-07	8.51954
GIMAP6	0.560143	3.78038	5.68585	2.18944e-08	1.32312e-07	8.50931
SYTL2	0.600548	2.70931	5.67635	2.30688e-08	1.38924e-07	8.45882
MARK1	-0.70166	1.81775	-5.67602	2.31101e-08	1.38994e-07	8.45709
CCDC114	0.647824	1.57916	5.67588	2.31275e-08	1.39036e-07	8.45636
SFTPD	1.34146	6.88996	5.67353	2.34287e-08	1.40719e-07	8.44386
SPINK2	0.814453	1.47109	5.67346	2.34379e-08	1.40719e-07	8.44348
SERTAD4	0.732184	2.60742	5.66356	2.47464e-08	1.4819e-07	8.39099
CST5	0.571622	0.929996	5.66175	2.49943e-08	1.49416e-07	8.38136
C1QA	0.723877	7.87746	5.66129	2.50573e-08	1.49728e-07	8.37892
DAB2	0.539164	3.90397	5.65809	2.5501e-08	1.52248e-07	8.36196
CRYM	1.15402	2.94146	5.65667	2.56991e-08	1.53299e-07	8.35448
TLR4	0.586046	2.93705	5.65627	2.57563e-08	1.53508e-07	8.35234
DDIT4L	-0.979261	2.56794	-5.65596	2.58e-08	1.53636e-07	8.3507
C6	0.6931	1.09512	5.65494	2.59442e-08	1.54362e-07	8.34532
CD300C	0.581957	2.23359	5.65407	2.60683e-08	1.55034e-07	8.34071
RERG	0.596676	2.2042	5.64476	2.74321e-08	1.62725e-07	8.29144
SAMSN1	0.625886	2.89627	5.63663	2.86792e-08	1.69615e-07	8.24849
TCEAL2	0.589278	0.893825	5.63216	2.93869e-08	1.73578e-07	8.22494
DKK3	0.652587	4.36482	5.63128	2.95287e-08	1.74267e-07	8.22029
FOXJ1	1.03677	4.20972	5.63038	2.96742e-08	1.75051e-07	8.21555
CDR2L	-0.53992	4.07155	-5.62769	3.01134e-08	1.77416e-07	8.20135
CTSF	0.571898	4.74185	5.62691	3.02426e-08	1.78025e-07	8.19722
PPM1H	-0.648969	2.70895	-5.6225	3.09778e-08	1.82044e-07	8.17402
LIFR	0.666675	3.10899	5.62085	3.12578e-08	1.83611e-07	8.16533
PLCH2	0.528303	1.10936	5.61973	3.14491e-08	1.84578e-07	8.15944
VSIG4	0.818226	5.36713	5.61637	3.20302e-08	1.87751e-07	8.14175
GPNMB	0.768489	5.68855	5.61607	3.2083e-08	1.8798e-07	8.14016
PGM5	0.561061	1.79608	5.61548	3.21863e-08	1.88426e-07	8.13706
RASGEF1A	-0.694714	2.26649	-5.6141	3.24289e-08	1.89607e-07	8.1298
KITLG	0.639576	4.45346	5.61326	3.25785e-08	1.9032e-07	8.12536
MAGEA1	-1.06498	0.011215	-5.612	3.28031e-08	1.91552e-07	8.11872
S100A13	0.510433	5.01555	5.61149	3.28934e-08	1.91998e-07	8.11607
TTC29	0.602568	0.640519	5.60545	3.39921e-08	1.98077e-07	8.08434
TMEM184A	-0.657826	3.50071	-5.59997	3.50214e-08	2.03562e-07	8.05553
MOXD1	0.701837	3.60082	5.5993	3.51486e-08	2.0413e-07	8.05203
GABRB3	-0.711911	0.720542	-5.59727	3.55383e-08	2.06134e-07	8.04138
TM4SF5	-1.09629	0.409865	-5.59487	3.6004e-08	2.08486e-07	8.02881
MYH11	0.839353	3.90093	5.59302	3.63675e-08	2.10503e-07	8.01911
TMEM159	0.557724	5.16696	5.59102	3.67661e-08	2.12544e-07	8.00859
ISG20	-0.532419	3.40735	-5.58314	3.83708e-08	2.21083e-07	7.96734
PTPRZ1	0.796856	0.777817	5.57059	4.10696e-08	2.35946e-07	7.90172
RASSF4	0.535704	3.95689	5.55888	4.37539e-08	2.50743e-07	7.8406
SLC16A3	-0.634022	4.68718	-5.55794	4.39777e-08	2.51818e-07	7.83568
C1QC	0.733931	7.48084	5.55627	4.43753e-08	2.53989e-07	7.82699
RBPMS	0.554144	3.90864	5.55453	4.47957e-08	2.5629e-07	7.81789
TEK	0.514674	2.35335	5.55295	4.51787e-08	2.58268e-07	7.80967
MAGEA4	-1.15182	0.0763821	-5.54781	4.64494e-08	2.65095e-07	7.7829
SLC37A2	0.576896	2.46359	5.54617	4.68619e-08	2.67009e-07	7.77437
CD180	0.514317	2.07825	5.54303	4.76603e-08	2.71001e-07	7.75806
CLGN	-0.876039	1.1499	-5.54266	4.77557e-08	2.71432e-07	7.75613
LY6K	-1.08419	1.49212	-5.54226	4.78598e-08	2.71912e-07	7.75403
EFNB3	0.639489	1.81193	5.54216	4.78853e-08	2.71945e-07	7.75352
NTN4	0.647773	3.93617	5.54094	4.82012e-08	2.73627e-07	7.74717
COL25A1	-0.936977	0.777636	-5.53823	4.891e-08	2.7731e-07	7.73308
MYH10	0.527586	3.99865	5.53714	4.91978e-08	2.786e-07	7.72742
DOC2B	-0.709308	2.13037	-5.53489	4.97963e-08	2.81388e-07	7.71575
MBOAT1	0.511632	3.74943	5.53486	4.98048e-08	2.81388e-07	7.71558
TMEM119	0.610275	3.90422	5.53025	5.10553e-08	2.88059e-07	7.69165
DNAJC12	-1.22989	3.12528	-5.52963	5.12258e-08	2.88903e-07	7.68844
STMN3	0.747574	3.82432	5.52882	5.14493e-08	2.89928e-07	7.68424
SLC46A2	0.869971	2.00433	5.52793	5.16973e-08	2.91174e-07	7.6796
SUCNR1	0.734295	2.03236	5.52788	5.17124e-08	2.91174e-07	7.67931
HSPB6	0.709627	2.73472	5.52451	5.2657e-08	2.95996e-07	7.66185
RGS20	-0.647735	0.520911	-5.52161	5.3483e-08	3.00046e-07	7.64683
ITGAX	0.573616	3.70494	5.52144	5.35316e-08	3.00197e-07	7.64595
TMEM98	0.649864	4.42643	5.52022	5.38828e-08	3.01922e-07	7.63964
C1orf21	0.553803	2.66874	5.52004	5.39351e-08	3.02093e-07	7.63871
CHMP4C	-0.504327	4.39156	-5.51987	5.39843e-08	3.02246e-07	7.63783
SSPN	0.566907	2.5022	5.51298	5.602e-08	3.13138e-07	7.60211
SLC22A17	0.628298	2.88855	5.51199	5.63191e-08	3.14556e-07	7.59697
SYT13	-1.24827	1.29252	-5.51133	5.6517e-08	3.15534e-07	7.59359
CD5	0.601726	2.71136	5.51093	5.66386e-08	3.16086e-07	7.59152
LOXL4	0.803703	2.80511	5.50772	5.76208e-08	3.21438e-07	7.57493
CHL1	-0.872779	2.36767	-5.50615	5.81104e-08	3.23908e-07	7.56677
PLA2G1B	1.07742	2.65435	5.5017	5.95098e-08	3.31309e-07	7.54381
LRP4	-0.739906	1.45293	-5.50101	5.97313e-08	3.32275e-07	7.54023
CLDN9	0.920486	2.26793	5.49728	6.09373e-08	3.38576e-07	7.52094
VWF	0.634659	5.28966	5.49678	6.10981e-08	3.39333e-07	7.5184
STEAP1	-0.91007	4.01681	-5.49543	6.15433e-08	3.41395e-07	7.5114
CD2	0.722726	4.80847	5.49489	6.17212e-08	3.42245e-07	7.50861
ECM2	0.539562	2.6577	5.48639	6.45895e-08	3.57578e-07	7.4648
PLXND1	0.519953	4.95006	5.48501	6.50685e-08	3.60086e-07	7.45767
PDE3A	-0.805317	1.71109	-5.48413	6.5375e-08	3.61637e-07	7.45314
WDFY4	0.603724	2.84376	5.48249	6.59492e-08	3.64668e-07	7.4447
HTR1D	-0.728837	1.30791	-5.47675	6.80029e-08	3.74828e-07	7.41512
C1orf87	0.55512	0.685673	5.47622	6.8196e-08	3.75593e-07	7.41239
MMRN1	0.59457	1.99698	5.4707	7.02318e-08	3.85667e-07	7.38402
BLVRB	-0.517749	5.69939	-5.47036	7.03587e-08	3.86123e-07	7.38228
SQLE	-0.543985	4.06504	-5.47027	7.03937e-08	3.86162e-07	7.3818
ABCC6	0.565224	2.48604	5.46842	7.109e-08	3.89827e-07	7.37231
DDC	-1.19584	1.12947	-5.46119	7.38817e-08	4.04496e-07	7.33516
NME5	0.623346	1.92927	5.45215	7.75212e-08	4.22918e-07	7.2888
FABP4	0.922631	2.53137	5.45071	7.81181e-08	4.25337e-07	7.2814
HHATL	0.667128	0.368763	5.45024	7.83143e-08	4.26111e-07	7.27898
RCAN2	0.631067	3.13093	5.4494	7.86627e-08	4.2763e-07	7.2747
PLLP	0.581825	2.64846	5.4478	7.93345e-08	4.30775e-07	7.2665
DHDH	0.653808	2.14444	5.44394	8.0978e-08	4.39011e-07	7.24673
MSR1	0.731569	3.81956	5.44333	8.1242e-08	4.4027e-07	7.2436
SGMS2	0.548904	4.0224	5.44036	8.25286e-08	4.46544e-07	7.22845
EHD2	0.584198	5.50852	5.43899	8.31342e-08	4.4947e-07	7.2214
EMP3	0.537671	4.73135	5.43647	8.42515e-08	4.54446e-07	7.20853
TTC25	0.638085	1.98193	5.43413	8.53021e-08	4.59398e-07	7.19658
CCND2	0.558711	3.0668	5.4334	8.56357e-08	4.61015e-07	7.19282
SLC5A5	-0.811647	0.905803	-5.42775	8.82342e-08	4.73664e-07	7.164
KCNJ5	0.606243	1.88443	5.4277	8.82587e-08	4.73664e-07	7.16373
MAL	0.749492	2.09238	5.42576	8.91697e-08	4.77259e-07	7.15384
C6orf118	0.667239	0.815376	5.42382	9.009e-08	4.81813e-07	7.14394
IGF2BP3	-0.823715	1.21047	-5.42357	9.0209e-08	4.82263e-07	7.14266
NTS	-1.4653	0.296707	-5.41455	9.46189e-08	5.02735e-07	7.09666
HAVCR2	0.598106	3.62288	5.41394	9.49261e-08	5.03981e-07	7.09354
SLC16A2	0.558029	2.73994	5.41241	9.56942e-08	5.07476e-07	7.08577
NCF2	0.61643	4.99545	5.41	9.69185e-08	5.13576e-07	7.07352
SPAG6	0.909885	1.64426	5.40074	1.01776e-07	5.3726e-07	7.02639
C20orf85	1.4058	2.6933	5.40014	1.02099e-07	5.38748e-07	7.02333
SCPEP1	0.565357	5.74731	5.39778	1.03373e-07	5.44863e-07	7.01138
MDFIC	0.527516	4.05255	5.38966	1.07893e-07	5.67389e-07	6.97015
TCEA3	0.733125	4.77312	5.38845	1.08584e-07	5.70375e-07	6.96399
LCN2	-1.29003	6.48909	-5.38469	1.10752e-07	5.80663e-07	6.94494
TBC1D10C	0.590731	2.69574	5.37871	1.14293e-07	5.98321e-07	6.91462
EMP1	0.638103	4.68863	5.3776	1.14958e-07	6.01348e-07	6.90903
FSTL4	-0.948984	1.8562	-5.37484	1.16642e-07	6.09698e-07	6.89502
KAZALD1	-0.546638	2.36932	-5.36419	1.23344e-07	6.41344e-07	6.8412
SCUBE2	0.831704	1.8627	5.36274	1.24284e-07	6.45503e-07	6.83389
PENK	0.727833	0.904879	5.36155	1.25064e-07	6.49313e-07	6.82786
SLCO4A1	-0.80453	1.95585	-5.36118	1.25304e-07	6.50314e-07	6.82601
OSCAR	0.639426	3.35693	5.35863	1.26993e-07	6.57849e-07	6.81311
MAP4K1	0.515584	2.79884	5.35618	1.2863e-07	6.6558e-07	6.80078
TEKT1	0.790044	1.16154	5.35555	1.29058e-07	6.67298e-07	6.79758
LTB	0.760994	4.81983	5.35493	1.29481e-07	6.69232e-07	6.79443
CLIC6	1.15632	5.48557	5.35384	1.30221e-07	6.72555e-07	6.78894
PCSK6	-0.564965	1.29045	-5.35374	1.30287e-07	6.72649e-07	6.78845
PDGFD	0.582023	2.46609	5.35298	1.30809e-07	6.75093e-07	6.7846
SLC28A2	-0.848288	0.816808	-5.35164	1.31729e-07	6.79335e-07	6.77785
VEGFC	-0.651431	2.31853	-5.35132	1.31949e-07	6.80217e-07	6.77624
MIF	-0.542786	5.56781	-5.35041	1.32576e-07	6.83195e-07	6.77167
BCAT1	0.827216	2.98084	5.34524	1.3621e-07	7.00355e-07	6.74563
ATP8A2	0.557759	0.896609	5.34452	1.36728e-07	7.02501e-07	6.74197
CABP4	-0.630128	1.56905	-5.34377	1.37262e-07	7.04719e-07	6.73822
ITGB8	0.783351	2.05431	5.33884	1.40847e-07	7.2179e-07	6.71339
GPR132	0.505515	2.62473	5.33619	1.42809e-07	7.3103e-07	6.70007
SORL1	0.645684	3.67576	5.3324	1.45661e-07	7.45083e-07	6.68102
RAPGEFL1	-0.567408	2.25319	-5.33192	1.46025e-07	7.46668e-07	6.67862
TNFSF13B	0.599299	3.9171	5.32109	1.54508e-07	7.87429e-07	6.62425
MDFI	-0.728893	3.80079	-5.31904	1.56166e-07	7.94709e-07	6.61397
BAIAP2L2	-0.832687	1.96527	-5.31835	1.56732e-07	7.97294e-07	6.61049
HTR3A	-0.966143	1.85776	-5.3149	1.59573e-07	8.10854e-07	6.5932
C9orf24	0.991358	1.9728	5.31364	1.60617e-07	8.15862e-07	6.58691
ENTPD3	0.714441	3.19582	5.31346	1.60771e-07	8.16344e-07	6.58599
HS3ST5	0.629543	0.604266	5.31079	1.63019e-07	8.27456e-07	6.57262
RGS1	0.797053	5.9105	5.31026	1.63466e-07	8.2942e-07	6.56999
FOSL1	-0.897506	2.70205	-5.30534	1.67704e-07	8.49369e-07	6.54535
CNTD2	-0.769318	1.8431	-5.30478	1.68195e-07	8.51543e-07	6.54254
PRAP1	-0.87375	0.805078	-5.30168	1.70917e-07	8.64061e-07	6.52708
WNT5A	0.66006	2.46855	5.29804	1.74179e-07	8.7895e-07	6.50888
LUM	0.707329	7.42225	5.2974	1.74765e-07	8.81586e-07	6.50565
SERPINA3	-0.574855	0.139659	-5.29312	1.78681e-07	9.00355e-07	6.48432
KLRC2	-0.506643	0.000897879	-5.2853	1.86076e-07	9.35577e-07	6.44529
MS4A4A	0.670915	3.68531	5.28339	1.87922e-07	9.44174e-07	6.43578
AMN	-0.759678	2.15629	-5.28237	1.8892e-07	9.48817e-07	6.43069
TP63	0.848801	1.56261	5.28164	1.89639e-07	9.51764e-07	6.42703
SIGLEC9	0.505798	2.34564	5.28018	1.91075e-07	9.57932e-07	6.41977
HSPA1A	-0.614261	5.49157	-5.27985	1.91399e-07	9.58862e-07	6.41814
PDLIM4	0.751277	3.19379	5.27914	1.9211e-07	9.62076e-07	6.41457
DNAH9	0.56447	0.645381	5.27862	1.92627e-07	9.64316e-07	6.41199
TMEM125	0.644812	6.30655	5.27842	1.92823e-07	9.64951e-07	6.41101
MSMB	-1.88913	3.59376	-5.27527	1.95991e-07	9.80452e-07	6.39532
FASN	-0.654101	5.26884	-5.27179	1.99546e-07	9.97156e-07	6.37802
PTPRH	-0.924111	2.20977	-5.27163	1.9971e-07	9.97613e-07	6.37724
IFIT1	0.817496	3.50921	5.26945	2.01976e-07	1.00857e-06	6.36638
HMGB3	-0.830355	6.07237	-5.26722	2.04318e-07	1.01916e-06	6.35528
HCST	0.567587	4.28086	5.26379	2.0797e-07	1.03551e-06	6.33824
ARMC4	0.584382	0.674075	5.25715	2.15216e-07	1.06967e-06	6.30528
ADM	-0.810548	3.29174	-5.25329	2.19539e-07	1.0896e-06	6.28615
SYT7	-0.858337	3.67854	-5.2494	2.23987e-07	1.10889e-06	6.26685
ITPR3	0.558498	5.09163	5.24735	2.26364e-07	1.11866e-06	6.2567
IFITM1	0.677911	6.82806	5.24608	2.2785e-07	1.1248e-06	6.2504
KLF5	-0.538522	5.36366	-5.23801	2.37503e-07	1.1687e-06	6.21049
GNG11	0.673071	3.84662	5.23526	2.40888e-07	1.18326e-06	6.19687
GIMAP8	0.51956	3.41959	5.23251	2.44317e-07	1.19841e-06	6.18328
MOCOS	-0.523248	2.19595	-5.22998	2.47514e-07	1.21254e-06	6.17077
ENTPD2	-0.665134	1.68367	-5.2209	2.59315e-07	1.26615e-06	6.12598
USH1C	-0.805744	0.846058	-5.21857	2.62425e-07	1.27953e-06	6.11451
AHNAK	0.642334	5.13743	5.21438	2.68123e-07	1.30502e-06	6.09385
SOD3	0.672436	4.78857	5.21208	2.71297e-07	1.31908e-06	6.08254
B4GALNT3	0.676307	3.96592	5.21124	2.72465e-07	1.32382e-06	6.07841
PROS1	0.570685	3.87512	5.21077	2.73124e-07	1.3261e-06	6.07608
ANPEP	0.86617	3.43904	5.20899	2.75621e-07	1.33728e-06	6.06733
MAGEB2	-0.773152	0.182596	-5.20437	2.82216e-07	1.36599e-06	6.04459
TLR8	0.629291	2.30357	5.20043	2.87948e-07	1.39076e-06	6.02526
BAAT	0.808621	0.936529	5.19938	2.8951e-07	1.39782e-06	6.02006
LGI3	0.688271	1.11603	5.1988	2.90357e-07	1.40093e-06	6.01725
PLCB2	0.510414	3.22875	5.19859	2.90675e-07	1.40198e-06	6.0162
NFKBIZ	0.61052	4.12786	5.19777	2.91899e-07	1.40739e-06	6.01216
DSP	-0.881205	5.08703	-5.19421	2.9725e-07	1.4307e-06	5.99469
NGFR	0.516771	1.16658	5.1932	2.98791e-07	1.43762e-06	5.98972
CNTNAP2	-0.650017	0.64743	-5.19064	3.02714e-07	1.45498e-06	5.97718
CD96	0.569693	2.16502	5.18999	3.03721e-07	1.45931e-06	5.97399
IFI44	0.750833	4.68004	5.17955	3.20314e-07	1.53266e-06	5.92285
GNAI1	-0.544124	3.24184	-5.17806	3.22769e-07	1.54215e-06	5.91551
CASR	0.508474	0.378711	5.17483	3.28117e-07	1.56621e-06	5.89972
MUC4	-1.04821	3.36748	-5.17396	3.29565e-07	1.57204e-06	5.89549
FKBP11	-0.51365	4.02667	-5.17058	3.35283e-07	1.59822e-06	5.87895
CLEC3B	0.726804	3.66445	5.16985	3.36537e-07	1.60364e-06	5.87536
EMCN	0.539326	2.77307	5.16637	3.42528e-07	1.62995e-06	5.8584
LDOC1	0.777977	4.76046	5.16397	3.46747e-07	1.6472e-06	5.84664
DPT	0.780879	4.2771	5.15771	3.57932e-07	1.69626e-06	5.81613
KDR	0.656352	4.18354	5.15439	3.64009e-07	1.7227e-06	5.79995
KCNJ2	0.512487	2.20875	5.15298	3.66628e-07	1.73273e-06	5.79306
CCL26	-0.588435	0.963172	-5.15018	3.71873e-07	1.75632e-06	5.77941
EPDR1	0.711212	4.48615	5.14968	3.72815e-07	1.76017e-06	5.77698
APCDD1	0.553745	2.69549	5.14679	3.78314e-07	1.78431e-06	5.76291
HTRA1	0.558386	5.56932	5.14639	3.79084e-07	1.78733e-06	5.76096
KRT16	-1.10484	2.24748	-5.14133	3.88929e-07	1.8325e-06	5.73632
CA13	0.527304	2.4277	5.1408	3.89972e-07	1.83617e-06	5.73375
RPL22L1	-0.525017	3.73659	-5.13367	4.04276e-07	1.89707e-06	5.69914
FLNC	-0.796489	1.85719	-5.13107	4.09631e-07	1.91895e-06	5.6865
LMNB1	-0.510087	4.04032	-5.12976	4.12353e-07	1.9304e-06	5.68013
MAN1A1	0.515343	4.07207	5.12789	4.16272e-07	1.94743e-06	5.67105
GPR171	0.695167	2.72289	5.12328	4.26067e-07	1.98922e-06	5.6487
GPD1	0.600755	1.44767	5.12268	4.27353e-07	1.99455e-06	5.64581
PNMA6A	0.647458	1.35907	5.10625	4.64239e-07	2.15365e-06	5.56629
GLI3	0.54084	1.59515	5.1056	4.65764e-07	2.15928e-06	5.56314
ZNF117	0.60444	2.8275	5.10548	4.6605e-07	2.15989e-06	5.56255
SLC6A8	-0.653835	3.3024	-5.099	4.81498e-07	2.22404e-06	5.53124
PDX1	-0.650282	0.565496	-5.09754	4.85025e-07	2.23884e-06	5.52423
HLA-DPB2	0.671616	1.71446	5.09701	4.8633e-07	2.24337e-06	5.52165
SLC16A9	1.0217	2.53728	5.09519	4.90808e-07	2.26327e-06	5.51285
TMEM163	0.735528	3.23655	5.09235	4.97842e-07	2.29418e-06	5.49918
MAPK4	-0.645962	0.192613	-5.089	5.06287e-07	2.32768e-06	5.48303
NTSR1	-0.531762	0.397585	-5.07699	5.37709e-07	2.46152e-06	5.42522
CAPSL	0.876404	1.5587	5.07363	5.46825e-07	2.50077e-06	5.40908
CPE	-0.924658	5.23752	-5.06532	5.70047e-07	2.59926e-06	5.36916
NNMT	-0.726987	6.0462	-5.06061	5.83622e-07	2.65853e-06	5.34657
FXYD5	0.555151	5.36994	5.05614	5.9678e-07	2.71401e-06	5.32517
IMPA2	-0.594831	4.77911	-5.05392	6.03442e-07	2.74251e-06	5.31451
APOBEC3G	0.525515	2.73629	5.04869	6.1937e-07	2.80816e-06	5.28951
TRPC6	0.724268	2.96144	5.04865	6.19509e-07	2.80816e-06	5.2893
MYL9	0.506019	6.34776	5.04853	6.19875e-07	2.8089e-06	5.28873
NUDT8	-0.50372	3.26281	-5.04814	6.21092e-07	2.81257e-06	5.28685
C8A	-0.525535	0.194804	-5.04807	6.21304e-07	2.81261e-06	5.28652
HPCAL4	0.531129	0.751109	5.04221	6.39687e-07	2.88829e-06	5.25854
GZMK	0.734607	3.14034	5.03631	6.58778e-07	2.97061e-06	5.23032
CIB2	-0.591704	2.47813	-5.03473	6.63961e-07	2.99301e-06	5.2228
CHST3	0.65563	2.68001	5.03447	6.64806e-07	2.99584e-06	5.22158
BLK	0.57849	1.06385	5.03031	6.787e-07	3.05448e-06	5.20173
XAF1	0.507918	2.55398	5.02615	6.92873e-07	3.11624e-06	5.1819
CRISP3	-0.648355	0.548668	-5.0252	6.96179e-07	3.1301e-06	5.17734
HLA-B	0.571294	9.5055	5.02342	7.02337e-07	3.15573e-06	5.16889
ADORA1	0.745172	1.94228	5.0217	7.08348e-07	3.17965e-06	5.16071
PTGS1	0.51623	2.61663	5.01257	7.41187e-07	3.31953e-06	5.11724
SLC14A2	-0.818114	0.788311	-5.01131	7.45807e-07	3.33806e-06	5.11128
FAM83B	-0.640793	0.809316	-4.99844	7.94853e-07	3.54157e-06	5.05019
TMEM108	0.609211	1.87771	4.99484	8.09113e-07	3.60279e-06	5.03314
IGFBP6	0.805219	3.34572	4.99326	8.15465e-07	3.62641e-06	5.02564
S100A7	-0.931457	0.71854	-4.99044	8.26891e-07	3.67487e-06	5.0123
ADAM8	0.647987	4.71737	4.98785	8.37546e-07	3.71864e-06	5.00002
GATA6	0.58891	2.82215	4.98507	8.491e-07	3.76511e-06	4.98688
CAPS	0.73924	4.0208	4.98227	8.60918e-07	3.81386e-06	4.97363
PIM2	0.602648	4.99754	4.98141	8.64556e-07	3.82875e-06	4.96959
ABLIM1	-0.517538	4.54321	-4.98133	8.64902e-07	3.82906e-06	4.9692
SNX21	0.513735	3.58557	4.97486	8.92926e-07	3.94304e-06	4.93863
TMTC1	-0.565756	1.24922	-4.97443	8.94787e-07	3.95001e-06	4.93663
ZNF334	0.500654	1.02844	4.96818	9.22768e-07	4.06446e-06	4.90711
LAMA3	-0.860039	3.07978	-4.96775	9.24688e-07	4.07033e-06	4.90512
ID2	0.501604	4.67752	4.96729	9.26822e-07	4.07843e-06	4.90291
CCR5	0.532284	3.1551	4.96567	9.34203e-07	4.10792e-06	4.89531
RAB11FIP1	0.548488	4.36203	4.96321	9.45583e-07	4.15023e-06	4.8837
GDPD3	-0.605193	2.58694	-4.96291	9.46987e-07	4.15266e-06	4.88228
RYR1	0.581395	1.44929	4.96272	9.47833e-07	4.15374e-06	4.88142
ANXA10	-1.07328	0.941912	-4.95637	9.77873e-07	4.27592e-06	4.85151
ALOX15	0.820285	1.33073	4.95276	9.95362e-07	4.34691e-06	4.83452
TNFRSF19	0.646182	3.00256	4.95214	9.98366e-07	4.35453e-06	4.83163
STK33	0.517066	1.75855	4.95121	1.00295e-06	4.37178e-06	4.82724
DIO1	0.625369	0.600194	4.94837	1.01703e-06	4.43038e-06	4.81388
ITGA2	0.781947	4.02711	4.94756	1.02107e-06	4.44655e-06	4.81009
MS4A1	0.863963	2.26956	4.94665	1.0256e-06	4.4649e-06	4.80584
RPL39L	-0.694045	3.92426	-4.94454	1.03629e-06	4.5072e-06	4.7959
PRR15	-0.996971	2.45552	-4.94114	1.05366e-06	4.57843e-06	4.77997
HPGD	1.07595	4.29664	4.94051	1.05694e-06	4.58978e-06	4.777
SERPINA4	-0.83896	0.52146	-4.93976	1.06084e-06	4.60259e-06	4.77347
IGFBP3	-0.746023	5.70958	-4.93933	1.06306e-06	4.61058e-06	4.77146
OAS1	-0.622663	4.72194	-4.9341	1.0906e-06	4.71971e-06	4.74695
CXCL14	1.42079	5.09326	4.92697	1.12925e-06	4.87325e-06	4.71358
SOX21	-0.797048	1.2639	-4.91601	1.19132e-06	5.12355e-06	4.66232
CHIT1	1.06017	3.55914	4.91496	1.19741e-06	5.14335e-06	4.65744
RENBP	0.512314	3.80992	4.91412	1.20235e-06	5.1614e-06	4.65349
RAB37	0.530723	2.04305	4.90452	1.25988e-06	5.39498e-06	4.60872
CSPG5	0.572968	1.66093	4.89739	1.30433e-06	5.56638e-06	4.57552
SELL	0.640214	3.6401	4.88377	1.39343e-06	5.9193e-06	4.51224
CD3E	0.566972	3.70008	4.88363	1.3944e-06	5.92161e-06	4.51157
CFTR	0.825314	2.22738	4.88209	1.40484e-06	5.96044e-06	4.50443
CD93	0.564593	4.92439	4.88148	1.40899e-06	5.97623e-06	4.5016
SPHK1	-0.57346	2.65104	-4.8795	1.42257e-06	6.03199e-06	4.49242
STOML3	0.622682	0.939967	4.87364	1.46348e-06	6.19408e-06	4.46527
KRT17	-1.26044	4.14968	-4.86635	1.51605e-06	6.40173e-06	4.43148
SRPX	0.596708	2.4269	4.86304	1.54049e-06	6.49424e-06	4.41618
IFI16	0.57244	4.89508	4.86058	1.55888e-06	6.56576e-06	4.40482
RSAD2	0.59117	3.18364	4.85797	1.57861e-06	6.64482e-06	4.39278
B3GNT3	-0.851837	4.73563	-4.85493	1.60198e-06	6.74116e-06	4.37871
CST6	1.00376	4.53048	4.85388	1.61013e-06	6.77339e-06	4.37386
SGCE	0.542701	3.72356	4.85206	1.6243e-06	6.82885e-06	4.36547
CYP1B1	0.65673	4.20622	4.85187	1.62577e-06	6.83298e-06	4.3646
GABBR2	0.638298	0.78268	4.85165	1.62752e-06	6.83825e-06	4.36357
DNAI1	0.559261	0.952835	4.8486	1.65159e-06	6.93098e-06	4.34952
HCP5	0.537103	4.84276	4.84763	1.65938e-06	6.96157e-06	4.34502
DNAJB13	0.538556	1.61648	4.84611	1.67155e-06	7.00643e-06	4.33803
STS	0.508276	3.13302	4.8398	1.7231e-06	7.20271e-06	4.30896
HOXB13	-0.727805	0.616267	-4.82798	1.82381e-06	7.59619e-06	4.25461
CSAG1	-1.11886	0.436198	-4.8241	1.85813e-06	7.73216e-06	4.23677
TNNC1	0.733075	2.97793	4.82308	1.86718e-06	7.76259e-06	4.23212
CAPN5	-0.627756	3.52885	-4.81735	1.91924e-06	7.95779e-06	4.20581
DUSP2	0.506183	3.17442	4.816	1.93162e-06	8.00433e-06	4.19966
SFN	-0.623305	7.03475	-4.81501	1.94085e-06	8.04017e-06	4.1951
ENO3	-0.766043	1.85144	-4.80819	2.0053e-06	8.28487e-06	4.16386
NKD2	0.548002	2.87491	4.80702	2.01649e-06	8.32612e-06	4.15854
IFI44L	0.752959	3.06253	4.80328	2.05293e-06	8.46903e-06	4.1414
SLAMF9	-0.554832	1.36546	-4.8009	2.0764e-06	8.55567e-06	4.13053
PCK1	-0.512391	0.0363457	-4.79616	2.12397e-06	8.73348e-06	4.10887
PITX2	-0.876315	1.07385	-4.78771	2.21128e-06	9.0683e-06	4.07035
MMP19	0.547564	3.1217	4.78727	2.216e-06	9.08226e-06	4.06831
PIK3AP1	0.505587	3.39483	4.78575	2.23211e-06	9.14288e-06	4.06138
TFPI2	1.46811	3.51781	4.78175	2.27503e-06	9.31042e-06	4.04317
DYNLRB2	0.63727	1.18161	4.77217	2.38112e-06	9.71303e-06	3.9996
VAX2	-0.504179	1.35322	-4.77021	2.40337e-06	9.79802e-06	3.99071
BHMT2	-1.10623	2.22679	-4.76705	2.43972e-06	9.93745e-06	3.97636
SLC5A1	0.823692	1.54412	4.76455	2.46889e-06	1.00453e-05	3.965
AGR2	-0.97766	7.06475	-4.76453	2.46909e-06	1.00453e-05	3.96492
SLC10A4	-0.564517	0.614119	-4.76383	2.47739e-06	1.00761e-05	3.96171
ITGB3	0.57475	1.4921	4.7559	2.57229e-06	1.04132e-05	3.92578
AHNAK2	-0.843266	2.88625	-4.75321	2.60533e-06	1.05377e-05	3.91359
EPHA3	0.544151	1.23283	4.75295	2.60852e-06	1.05475e-05	3.91241
ANGPT2	-0.542661	2.73548	-4.75074	2.63604e-06	1.06526e-05	3.90239
SELP	0.505904	2.54844	4.74845	2.66477e-06	1.07624e-05	3.89203
CASP14	-0.519742	0.314175	-4.74415	2.71952e-06	1.09611e-05	3.87259
HK3	0.610947	3.16213	4.74191	2.74854e-06	1.10749e-05	3.86245
DHRS3	0.50002	5.46732	4.73361	2.85843e-06	1.14776e-05	3.82499
TIMP3	0.584891	2.55678	4.73056	2.89988e-06	1.16373e-05	3.81124
PON1	0.502782	1.01315	4.72908	2.92018e-06	1.17121e-05	3.80457
GPRIN2	0.663697	3.08317	4.72891	2.92256e-06	1.17181e-05	3.8038
EFS	0.694339	3.16496	4.72419	2.98835e-06	1.19612e-05	3.78253
RAC3	-0.591766	3.64535	-4.72269	3.00949e-06	1.20388e-05	3.7758
GNGT1	-0.567191	0.580252	-4.72153	3.02604e-06	1.20981e-05	3.77056
MX1	0.642911	4.90625	4.71538	3.11495e-06	1.24427e-05	3.7429
PXMP4	0.521482	3.47223	4.71314	3.1479e-06	1.25671e-05	3.73285
IQGAP2	0.51407	2.19355	4.70673	3.24427e-06	1.29369e-05	3.70405
CLDN10	-1.14792	2.24985	-4.70316	3.29913e-06	1.31368e-05	3.68803
HSPA2	-0.531014	2.2943	-4.701	3.33274e-06	1.32592e-05	3.67835
GSTO2	-0.572139	1.7539	-4.69969	3.35331e-06	1.33334e-05	3.67248
GYG2	-0.55481	2.50777	-4.69855	3.37132e-06	1.33973e-05	3.66736
ELOVL3	-0.51424	1.0208	-4.69763	3.38595e-06	1.34516e-05	3.66323
CDK6	-0.507459	1.9896	-4.69738	3.38984e-06	1.34632e-05	3.66213
CCL2	0.611306	5.09139	4.68912	3.52369e-06	1.39501e-05	3.62516
IFIT2	0.518042	3.62993	4.68044	3.66993e-06	1.44925e-05	3.58634
TMEM45A	-0.696283	2.67626	-4.67798	3.71233e-06	1.46432e-05	3.57537
CHST9	0.621667	0.444865	4.67671	3.73439e-06	1.47177e-05	3.56972
ENPP3	0.86272	1.64152	4.67501	3.76428e-06	1.48271e-05	3.56211
TSPAN8	-1.21468	4.23119	-4.67422	3.77819e-06	1.48727e-05	3.55859
FGFR3	0.84802	2.99017	4.67227	3.81274e-06	1.49796e-05	3.5499
TMED6	-0.750902	1.75008	-4.66927	3.86643e-06	1.51733e-05	3.53655
OXCT1	0.529441	3.06009	4.66391	3.9643e-06	1.55442e-05	3.51269
FMO5	0.773122	3.58178	4.65724	4.08958e-06	1.59947e-05	3.483
EGR2	0.561958	3.35954	4.65638	4.10587e-06	1.60449e-05	3.47921
PAPSS2	0.516925	4.95302	4.63878	4.45602e-06	1.73058e-05	3.40113
SAMD9L	0.54781	3.58323	4.63529	4.52885e-06	1.7564e-05	3.38566
XG	-0.531644	0.682272	-4.6296	4.65003e-06	1.80088e-05	3.36047
LAMB3	-0.736848	6.58667	-4.6221	4.81433e-06	1.85983e-05	3.32736
ARMC3	0.608435	1.41078	4.61852	4.89463e-06	1.88927e-05	3.31158
CYP2C18	-0.690939	1.58256	-4.61443	4.988e-06	1.92103e-05	3.29356
CCDC17	0.63021	1.75028	4.60481	5.2146e-06	2.00385e-05	3.2512
RSPH1	0.724844	2.44722	4.60453	5.22138e-06	2.00589e-05	3.24996
MMP2	0.608846	6.09953	4.60288	5.26125e-06	2.01953e-05	3.24271
GNA14	0.53514	3.24915	4.59982	5.33615e-06	2.04489e-05	3.22923
PYGL	-0.534279	4.10754	-4.5972	5.40092e-06	2.06742e-05	3.21773
PTTG1	-0.50459	3.68507	-4.5966	5.41572e-06	2.07194e-05	3.21512
WNT10A	0.642588	1.91666	4.58757	5.64559e-06	2.15512e-05	3.1755
ANXA1	0.765246	6.09004	4.5818	5.79726e-06	2.21119e-05	3.15023
VSIG1	1.17644	2.6519	4.57707	5.92466e-06	2.25606e-05	3.12951
MUCL1	-0.627221	0.26219	-4.57652	5.93956e-06	2.26111e-05	3.12712
C11orf16	0.59341	1.34861	4.56529	6.25348e-06	2.3689e-05	3.07804
HLA-F	0.534013	5.48274	4.56271	6.32788e-06	2.39441e-05	3.06677
PKP1	-1.01584	2.04443	-4.56132	6.36811e-06	2.40706e-05	3.06073
IL22RA1	-0.608471	1.42919	-4.56092	6.37995e-06	2.41088e-05	3.05896
TMEM37	0.558392	3.69871	4.55625	6.51749e-06	2.45749e-05	3.03864
ST6GALNAC2	0.563445	1.83546	4.5515	6.66061e-06	2.50805e-05	3.01795
SLC39A4	-0.537475	3.99111	-4.54039	7.00717e-06	2.63211e-05	2.96964
UGT2B4	-0.702254	0.658523	-4.53785	7.08865e-06	2.65783e-05	2.95863
LGR6	0.603716	1.7871	4.53784	7.08909e-06	2.65783e-05	2.95857
SULT1C2	0.714828	2.00129	4.53718	7.11037e-06	2.66509e-05	2.95571
PLEKHA6	-0.590053	3.54734	-4.53514	7.17664e-06	2.68702e-05	2.94688
PLEK2	-0.556151	4.0221	-4.53198	7.28066e-06	2.7245e-05	2.93318
IRF4	0.56432	2.0469	4.52883	7.38595e-06	2.76166e-05	2.9195
OMD	0.59576	1.82142	4.52206	7.61669e-06	2.84027e-05	2.89022
ECM1	0.735215	4.37743	4.5164	7.81503e-06	2.90719e-05	2.86574
FAM81B	0.683763	1.94278	4.51152	7.99003e-06	2.9699e-05	2.84466
CLEC12A	0.51083	1.7987	4.51091	8.01224e-06	2.97576e-05	2.84202
KRT6C	-0.570899	0.323823	-4.50543	8.21349e-06	3.04456e-05	2.8184
MMP13	1.09616	2.74687	4.50366	8.27959e-06	3.06619e-05	2.81077
ADAMTSL4	0.512224	2.68605	4.50336	8.29078e-06	3.06934e-05	2.80949
CYP2S1	0.672316	3.46115	4.49963	8.43205e-06	3.11914e-05	2.79341
ALDH1A3	0.587495	2.71583	4.49479	8.61877e-06	3.18396e-05	2.77256
SCGB3A2	1.37259	6.44406	4.48875	8.85689e-06	3.26844e-05	2.74663
TMSB4Y	-0.516218	0.80849	-4.47896	9.25681e-06	3.40876e-05	2.70461
CD27	0.604238	3.8701	4.47783	9.30426e-06	3.42532e-05	2.69975
KIF1A	-0.91747	1.17456	-4.47573	9.39283e-06	3.45426e-05	2.69073
TRIM29	-0.911397	1.70027	-4.46984	9.64509e-06	3.53858e-05	2.66552
MSLN	-1.43999	5.81649	-4.46474	9.8687e-06	3.61201e-05	2.64372
CLDN1	0.773565	4.67562	4.46284	9.95338e-06	3.64108e-05	2.6356
SLC22A3	0.725269	3.65809	4.45961	1.00991e-05	3.69049e-05	2.62178
MXRA8	0.557055	5.62407	4.45703	1.02167e-05	3.72876e-05	2.61077
SFRP5	0.52144	0.880815	4.45377	1.03669e-05	3.77162e-05	2.59689
HS6ST2	0.742508	3.44044	4.45243	1.04297e-05	3.79129e-05	2.59115
NPNT	0.674521	4.23142	4.44782	1.06473e-05	3.86533e-05	2.57151
MAGEA12	-0.966419	0.442216	-4.44661	1.07054e-05	3.88336e-05	2.56634
PTK6	-0.638908	3.94973	-4.44389	1.08364e-05	3.92781e-05	2.55477
GABRA3	-0.581656	0.708819	-4.43917	1.10675e-05	4.00528e-05	2.53471
SYT12	0.799982	1.85602	4.43439	1.13067e-05	4.08651e-05	2.51438
DUOX1	0.629399	3.11106	4.42821	1.16231e-05	4.18775e-05	2.48815
CD14	0.512502	6.52705	4.41826	1.21505e-05	4.36984e-05	2.44597
ADAMTS1	0.535335	2.93744	4.40952	1.26324e-05	4.52786e-05	2.40902
CD36	0.596832	2.48373	4.39555	1.34414e-05	4.80294e-05	2.35004
ATP6V0D2	0.520565	1.61918	4.38647	1.39931e-05	4.98721e-05	2.31184
COL7A1	-0.679271	1.86113	-4.38413	1.41392e-05	5.03669e-05	2.30197
ATP11A	0.550174	4.95951	4.38325	1.4194e-05	5.05361e-05	2.2983
HOXA10	-0.65574	0.762129	-4.38013	1.43913e-05	5.12254e-05	2.28519
SP5	-0.704536	1.72113	-4.37747	1.45616e-05	5.17916e-05	2.27402
GAS2	-0.531778	0.741632	-4.37725	1.45758e-05	5.18288e-05	2.27309
TGFB2	0.583564	2.23195	4.36858	1.51451e-05	5.3761e-05	2.23672
LYNX1	0.550374	2.30458	4.36772	1.52028e-05	5.39198e-05	2.23311
NMNAT2	0.783565	1.91853	4.35329	1.62008e-05	5.73128e-05	2.17275
HBEGF	0.527802	3.83199	4.34885	1.652e-05	5.83377e-05	2.15423
CLIC2	0.536532	4.14764	4.34789	1.65895e-05	5.85387e-05	2.15025
SIT1	0.518688	2.64157	4.31921	1.88116e-05	6.58792e-05	2.03098
COX7B2	-0.678315	0.536969	-4.30932	1.96423e-05	6.85946e-05	1.99
HSPB8	0.530216	3.77446	4.30229	2.02538e-05	7.06057e-05	1.96093
TMPRSS11E	-1.00432	2.40305	-4.30117	2.03525e-05	7.08783e-05	1.95632
DPYSL3	0.519103	5.1797	4.3011	2.03583e-05	7.08808e-05	1.95605
FOSB	0.923774	3.77204	4.29961	2.04915e-05	7.13085e-05	1.94987
KLRB1	0.501498	3.23534	4.2968	2.07439e-05	7.21324e-05	1.93827
F5	-0.712967	1.68537	-4.29375	2.10206e-05	7.30031e-05	1.9257
SPEF1	0.506714	1.47158	4.28658	2.16856e-05	7.51056e-05	1.89618
WDR66	0.515815	1.92702	4.28296	2.20298e-05	7.62213e-05	1.88125
CD3D	0.550263	3.53629	4.28151	2.21684e-05	7.66626e-05	1.87531
CD163	0.636254	5.27484	4.28027	2.2288e-05	7.69803e-05	1.87021
LPL	0.825328	3.7418	4.27827	2.24827e-05	7.75559e-05	1.86197
CSF3R	0.635731	3.39036	4.27552	2.27522e-05	7.84272e-05	1.85067
NR0B2	0.911604	1.59494	4.27292	2.30092e-05	7.92658e-05	1.84003
GJB2	-0.84119	4.00619	-4.26449	2.38646e-05	8.20372e-05	1.80544
FOXA3	-0.778755	2.20288	-4.26259	2.40614e-05	8.26316e-05	1.79766
VIL1	-0.978458	1.27027	-4.25734	2.4613e-05	8.43586e-05	1.77619
HBB	0.878137	5.71563	4.25368	2.50055e-05	8.55896e-05	1.7612
CXCL5	-0.930928	2.73037	-4.25259	2.5123e-05	8.58943e-05	1.75676
SLC27A2	-0.589386	2.6189	-4.24569	2.58812e-05	8.82904e-05	1.7286
RTN4RL2	0.670335	3.04464	4.2431	2.61719e-05	8.91724e-05	1.71802
CFI	0.532962	4.63232	4.23891	2.66481e-05	9.05942e-05	1.70094
KCNK17	0.526251	1.69353	4.23794	2.67601e-05	9.09082e-05	1.69697
SIX1	0.705119	3.11139	4.23493	2.71086e-05	9.20243e-05	1.68472
NR4A2	-0.616979	3.65533	-4.22101	2.87779e-05	9.73097e-05	1.62815
FAM20A	0.524738	4.34752	4.20954	3.02261e-05	0.000101636	1.58168
HOXB7	-0.702377	3.09025	-4.20723	3.05259e-05	0.000102495	1.57234
TMEM171	-0.511216	1.28164	-4.19057	3.27761e-05	0.000109546	1.50504
GOLGA8A	0.55888	2.47812	4.1864	3.33623e-05	0.000111452	1.48827
BMP4	0.626102	2.68866	4.18357	3.37674e-05	0.000112642	1.47686
LOXL2	-0.561094	3.38075	-4.17619	3.4844e-05	0.000115899	1.44717
FOXQ1	0.869199	3.73645	4.169	3.59232e-05	0.000119231	1.41833
BEX2	0.69033	3.47277	4.16101	3.71604e-05	0.000122983	1.38632
FHL2	-0.593937	3.72593	-4.13774	4.1e-05	0.000134598	1.29338
RND1	-0.668883	3.80651	-4.12529	4.32063e-05	0.000141238	1.24386
QPRT	-0.729458	3.68371	-4.12183	4.38393e-05	0.000143004	1.23012
ECHDC3	0.511703	3.81473	4.11707	4.47244e-05	0.000145617	1.21125
EIF1AY	-0.889301	0.927013	-4.11549	4.50237e-05	0.000146488	1.20495
PLD5	0.506537	0.930457	4.09842	4.83604e-05	0.000156499	1.13744
SEZ6L2	0.628972	4.74026	4.09593	4.88656e-05	0.00015795	1.12763
CRTAC1	0.770367	3.2578	4.0829	5.15976e-05	0.000166354	1.07628
GALNT5	0.61782	2.69594	4.08183	5.18275e-05	0.000167056	1.07208
ITGBL1	0.532086	2.84773	4.08157	5.18839e-05	0.000167121	1.07106
CFD	0.595743	4.66492	4.06756	5.49999e-05	0.000176624	1.01603
PTN	0.693744	2.88079	4.06659	5.52215e-05	0.000177295	1.01224
WFDC10B	0.608669	2.10148	4.06221	5.62348e-05	0.000180131	0.995082
IFI27	0.695191	6.47763	4.05976	5.68082e-05	0.000181757	0.985514
MSI1	-0.598989	1.27121	-4.05968	5.68284e-05	0.00018178	0.985177
FOS	0.615703	6.63279	4.05638	5.76114e-05	0.000184072	0.972271
COL9A2	0.647582	3.33242	4.04468	6.04697e-05	0.000192539	0.926608
ESM1	-0.56064	3.01078	-4.04143	6.12879e-05	0.000194875	0.913935
HOXC13	-0.632199	0.547155	-4.04043	6.15421e-05	0.000195639	0.910033
CR2	0.647763	1.96864	4.04024	6.15893e-05	0.000195744	0.909312
S100A9	-0.892424	8.10927	-4.03932	6.18249e-05	0.000196402	0.905712
INA	-0.622463	0.675822	-4.03832	6.20799e-05	0.000197053	0.901831
GDF15	0.769885	4.89192	4.03616	6.26358e-05	0.000198433	0.893427
MAP7D2	0.620186	1.8888	4.03491	6.29623e-05	0.000199309	0.888526
CPB2	0.779231	1.16886	4.02631	6.52342e-05	0.000205817	0.855114
ZBTB16	0.510633	1.46499	4.00701	7.06194e-05	0.000221296	0.780373
PCSK1	-0.955292	0.648941	-3.99587	7.39181e-05	0.000230902	0.737371
MUC20	-0.673363	4.32045	-3.99509	7.41562e-05	0.000231594	0.734342
FCGR3A	0.538967	6.25893	3.99252	7.49404e-05	0.000233938	0.724436
FOXC1	0.526259	2.491	3.99077	7.54769e-05	0.000235189	0.717718
NT5E	0.700055	3.65088	3.98754	7.648e-05	0.00023794	0.705286
CHIA	0.766063	2.05428	3.97586	8.02149e-05	0.000248444	0.660397
APOBEC1	-0.602673	0.812915	-3.97215	8.14355e-05	0.000251887	0.646181
DCBLD2	0.549704	3.6919	3.96203	8.48608e-05	0.000261547	0.607407
LDLRAD1	-0.706053	1.84607	-3.96139	8.50826e-05	0.000262172	0.604951
CD79B	0.525834	2.82129	3.94812	8.97861e-05	0.000275441	0.554326
ESPN	0.566927	2.56347	3.92072	0.000100298	0.000305391	0.450212
TMEM190	0.73983	1.81836	3.91716	0.000101748	0.000309466	0.436718
FCRLA	0.50263	1.58457	3.89908	0.000109411	0.000331099	0.368489
[truncated: 48 more rows]

## Sheet: B-C
gene	logFC	AveExpr	t	P.Value	adj.P.Val	B
ADH1B	2.74403	3.14746	19.0725	1.14275e-61	1.5835e-57	129.567
KIF4A	-1.63882	2.51488	-17.9118	4.59304e-56	3.18228e-52	116.772
TPX2	-1.86524	3.78392	-17.5532	2.39196e-54	9.0287e-51	112.852
GTSE1	-1.3843	2.12429	-17.5454	2.60625e-54	9.0287e-51	112.767
INMT	1.97985	3.28641	17.4194	1.0393e-53	2.88032e-50	111.396
CDCA5	-1.59732	2.77724	-17.3499	2.22757e-53	4.89272e-50	110.64
FOXM1	-1.69488	3.05213	-17.3311	2.7378e-53	4.89272e-50	110.435
CDC20	-1.77684	4.02982	-17.3282	2.82469e-53	4.89272e-50	110.404
CENPA	-1.64231	2.08366	-17.1308	2.44992e-52	3.48129e-49	108.263
KIF2C	-1.62722	2.85336	-17.1285	2.5123e-52	3.48129e-49	108.238
CCNB2	-1.51468	2.96075	-17.1069	3.18204e-52	4.0085e-49	108.003
PLK1	-1.39485	2.85485	-16.9709	1.40295e-51	1.62006e-48	106.532
NEK2	-1.62658	2.52691	-16.9275	2.2519e-51	2.40035e-48	106.063
ADAMTS8	1.51796	1.46081	16.9147	2.58942e-51	2.56297e-48	105.925
MELK	-1.68402	2.52845	-16.8954	3.19192e-51	2.9487e-48	105.717
UHRF1	-1.3809	2.19419	-16.8659	4.40148e-51	3.81196e-48	105.399
NCAPG	-1.54962	1.98891	-16.8105	8.04483e-51	6.25638e-48	104.801
CDCA3	-1.30297	1.90459	-16.8095	8.12692e-51	6.25638e-48	104.791
FAM83D	-1.60553	2.6794	-16.7813	1.10502e-50	8.05907e-48	104.486
KIF23	-1.37236	2.03074	-16.7546	1.47652e-50	1.02301e-47	104.199
TROAP	-1.5865	2.42983	-16.682	3.24723e-50	2.14271e-47	103.417
CDCA8	-1.45543	3.17361	-16.6699	3.70283e-50	2.33227e-47	103.287
NDC80	-1.47572	2.12238	-16.6268	5.90582e-50	3.55813e-47	102.824
CEP55	-1.62823	3.01594	-16.6198	6.37289e-50	3.67955e-47	102.749
AURKB	-1.59804	2.87124	-16.5854	9.25063e-50	5.12744e-47	102.379
RAD54L	-1.38021	1.70358	-16.5328	1.63443e-49	8.7109e-47	101.815
PRC1	-1.30846	2.92391	-16.5267	1.74494e-49	8.95543e-47	101.75
CCNB1	-1.47546	3.7974	-16.3964	7.13185e-49	3.5295e-46	100.354
BIRC5	-1.75574	3.39049	-16.3523	1.14831e-48	5.48696e-46	99.8821
SPAG5	-1.39739	2.84815	-16.243	3.72444e-48	1.72032e-45	98.7156
KIF20A	-1.36914	2.64093	-16.1841	7.01437e-48	3.13542e-45	98.088
UBE2C	-2.02709	4.59475	-16.1685	8.29725e-48	3.59297e-45	97.9215
TTK	-1.49705	1.66167	-16.1025	1.6859e-47	7.07923e-45	97.2186
DEPDC1B	-1.40433	1.59516	-15.9907	5.58646e-47	2.27681e-44	96.031
DEPDC1	-1.48554	1.45819	-15.913	1.28327e-46	4.95727e-44	95.2065
KIFC1	-1.50762	3.261	-15.9126	1.28788e-46	4.95727e-44	95.203
AQP4	2.81782	3.84489	15.8675	2.08567e-46	7.81112e-44	94.725
LRRK2	2.27914	3.39564	15.8639	2.16697e-46	7.90201e-44	94.6871
CENPI	-1.12052	1.3893	-15.8527	2.44234e-46	8.67782e-44	94.5685
CDC25C	-1.22925	1.50673	-15.8306	3.09305e-46	1.07151e-43	94.3344
C7	2.38251	4.41324	15.7928	4.62746e-46	1.56397e-43	93.935
BUB1B	-1.37107	2.21048	-15.7869	4.92722e-46	1.62563e-43	93.8728
MYBL2	-1.95964	3.99381	-15.7344	8.62414e-46	2.77918e-43	93.3179
ESPL1	-1.25626	1.78832	-15.7053	1.17533e-45	3.70149e-43	93.011
CENPF	-1.5069	2.42316	-15.6787	1.5604e-45	4.805e-43	92.7301
KIF15	-1.20215	1.36188	-15.6667	1.7728e-45	5.34036e-43	92.6036
CCNA2	-1.42378	2.99871	-15.5921	3.91512e-45	1.14309e-42	91.8182
CDKN3	-1.55768	2.47755	-15.591	3.95963e-45	1.14309e-42	91.807
FEN1	-1.01771	4.02422	-15.5775	4.57312e-45	1.29326e-42	91.6642
NUF2	-1.56073	2.19911	-15.5537	5.88761e-45	1.61048e-42	91.4138
ASF1B	-1.23098	3.42061	-15.553	5.92728e-45	1.61048e-42	91.4071
ASPM	-1.33937	1.6743	-15.5452	6.43916e-45	1.71591e-42	91.325
NCAPH	-1.37925	2.55178	-15.4707	1.41759e-44	3.70633e-42	90.5428
KIF14	-1.25939	1.30863	-15.4419	1.92424e-44	4.93782e-42	90.2399
CENPE	-1.14865	1.3623	-15.3998	3.00079e-44	7.56036e-42	89.7995
NCAPG2	-1.08228	2.62378	-15.3976	3.07343e-44	7.60508e-42	89.7758
PLK4	-1.07945	1.79983	-15.3732	3.97652e-44	9.66713e-42	89.5204
KIF11	-1.24473	2.80823	-15.3628	4.438e-44	1.0603e-41	89.4116
SPC25	-1.31319	1.7573	-15.3534	4.90322e-44	1.15159e-41	89.3128
PKMYT1	-1.23696	2.07747	-15.3474	5.22164e-44	1.20594e-41	89.2504
EXO1	-1.32194	1.73738	-15.316	7.27398e-44	1.65238e-41	88.9218
CHEK1	-1.24842	1.86367	-15.2086	2.25388e-43	5.03743e-41	87.8009
AURKA	-1.3733	3.15277	-15.1914	2.70189e-43	5.94286e-41	87.6212
CDC6	-1.41721	2.36556	-15.1757	3.18644e-43	6.89915e-41	87.4577
ZWINT	-1.30083	3.7871	-15.1573	3.86469e-43	8.23892e-41	87.2664
RRM2	-1.54836	3.35309	-15.1549	3.96395e-43	8.32249e-41	87.2413
PEBP4	2.80743	3.82013	15.1081	6.48263e-43	1.34074e-40	86.7538
SUSD2	2.5035	4.77583	15.0859	8.18258e-43	1.66744e-40	86.523
MAMDC2	1.61225	2.19119	15.0623	1.04743e-42	2.10351e-40	86.2782
RAD51AP1	-1.28321	2.20217	-15.0213	1.60934e-42	3.1858e-40	85.8526
TOP2A	-1.61846	3.9868	-14.9829	2.40617e-42	4.69611e-40	85.4539
STIL	-1.01401	1.68314	-14.9704	2.74296e-42	5.27905e-40	85.3241
ANLN	-1.64205	2.91808	-14.9662	2.86527e-42	5.43892e-40	85.2809
KPNA2	-1.16548	5.03188	-14.9456	3.55372e-42	6.65459e-40	85.0674
SCN7A	1.41029	2.12127	14.9032	5.53756e-42	1.02312e-39	84.6278
MKI67	-1.4683	2.8525	-14.8629	8.42967e-42	1.53697e-39	84.2114
BUB1	-1.41142	2.21746	-14.8582	8.85809e-42	1.59411e-39	84.1623
ERCC6L	-1.0536	1.17226	-14.85	9.64313e-42	1.71314e-39	84.0781
POLE2	-1.04707	1.84599	-14.7621	2.409e-41	4.2255e-39	83.1708
TNXB	1.31194	1.90042	14.6573	7.15687e-41	1.23966e-38	82.0917
RACGAP1	-1.12678	3.2291	-14.6136	1.12518e-40	1.92489e-38	81.6433
MCM10	-1.30205	1.52649	-14.5695	1.77604e-40	3.00129e-38	81.191
ARHGAP11A	-1.13626	1.95439	-14.5452	2.28355e-40	3.81243e-38	80.942
POLQ	-0.965598	0.922024	-14.5116	3.23155e-40	5.33091e-38	80.5979
MCM4	-1.19579	3.89526	-14.5068	3.3974e-40	5.53857e-38	80.5483
TCF21	1.3502	2.00017	14.5055	3.44473e-40	5.55043e-38	80.5346
NUSAP1	-1.19787	3.49466	-14.493	3.91905e-40	6.2421e-38	80.4067
GINS1	-1.2344	2.39457	-14.4758	4.6778e-40	7.36593e-38	80.2314
PSRC1	-1.00634	2.19512	-14.458	5.62372e-40	8.75594e-38	80.0489
TACC3	-1.03122	3.60008	-14.4492	6.15714e-40	9.47994e-38	79.9591
CDT1	-1.32356	2.54422	-14.427	7.73852e-40	1.17838e-37	79.7326
BRCA1	-0.988667	1.8143	-14.3603	1.53825e-39	2.3169e-37	79.0518
TRIP13	-1.48636	2.83673	-14.3115	2.54054e-39	3.7854e-37	78.5547
EME1	-1.04151	1.52811	-14.3029	2.77584e-39	4.092e-37	78.4669
PSMC3IP	-0.820051	1.76674	-14.2755	3.67417e-39	5.35925e-37	78.1891
HMMR	-1.27973	2.15186	-14.1901	8.81708e-39	1.27269e-36	77.3218
TRAIP	-0.821863	1.79709	-14.1398	1.47548e-38	2.1078e-36	76.8116
CDC25A	-1.017	1.49466	-14.1385	1.49411e-38	2.11264e-36	76.7992
CENPO	-0.780774	2.24996	-14.0837	2.61535e-38	3.6607e-36	76.2445
IQGAP3	-1.22685	2.96124	-14.08	2.71766e-38	3.76586e-36	76.2065
ABCA8	1.16548	1.31873	14.0678	3.07675e-38	4.22123e-36	76.0835
MAD2L1	-1.32637	1.98814	-14.0431	3.95847e-38	5.3777e-36	75.8339
CHRDL1	1.72364	2.84689	14.0257	4.72605e-38	6.35814e-36	75.6583
FHL1	1.49326	2.94512	14.0097	5.56299e-38	7.41215e-36	75.4967
RAD51	-1.09011	1.80785	-13.9737	8.01605e-38	1.05789e-35	75.1348
DBF4	-0.863876	2.26949	-13.9236	1.33349e-37	1.74322e-35	74.6306
CLSPN	-1.08859	1.56954	-13.9102	1.52815e-37	1.97903e-35	74.4956
SCTR	2.18673	3.11167	13.8823	2.02932e-37	2.60373e-35	74.2146
UBE2T	-1.28276	4.07081	-13.8552	2.66854e-37	3.39247e-35	73.9434
WDHD1	-1.00886	1.97891	-13.8422	3.04601e-37	3.83714e-35	73.8123
CDCA4	-0.994303	3.33492	-13.838	3.17875e-37	3.96828e-35	73.77
RFC4	-1.03741	2.97127	-13.8088	4.27129e-37	5.28458e-35	73.4774
FBXO5	-0.858703	1.99938	-13.7997	4.68114e-37	5.74041e-35	73.3866
ATP1A2	1.12268	0.674938	13.767	6.51088e-37	7.91415e-35	73.0598
SFTPD	2.85609	6.88996	13.7596	7.01957e-37	8.45775e-35	72.9853
CYP4B1	2.84937	4.54254	13.7587	7.08017e-37	8.45775e-35	72.9768
MFAP4	1.81254	5.31141	13.7473	7.94699e-37	9.41209e-35	72.8623
AGER	2.36316	4.54184	13.7373	8.78982e-37	1.03221e-34	72.7625
HLF	1.59376	1.9684	13.6896	1.42139e-36	1.65514e-34	72.2864
PBK	-1.49715	2.03311	-13.6616	1.88492e-36	2.17661e-34	72.0068
FANCI	-0.97875	2.55565	-13.6578	1.95877e-36	2.2432e-34	71.9687
C1QTNF7	0.985652	1.26963	13.635	2.46445e-36	2.79917e-34	71.7413
SCGB3A2	3.6591	6.44406	13.6307	2.57189e-36	2.89745e-34	71.699
EZH2	-1.01745	2.7162	-13.6139	3.04661e-36	3.40458e-34	71.5312
SFTPC	4.23679	6.0285	13.4891	1.06494e-35	1.18055e-33	70.2916
GINS2	-1.2461	2.26379	-13.4687	1.30623e-35	1.43655e-33	70.0893
UBE2S	-1.19183	3.17658	-13.4632	1.37897e-35	1.5046e-33	70.0357
RECQL4	-1.28443	3.11765	-13.4442	1.66715e-35	1.80482e-33	69.8477
XRCC2	-0.983581	1.5973	-13.4389	1.75896e-35	1.88945e-33	69.7946
BTNL9	1.18745	1.54685	13.3872	2.94613e-35	3.14035e-33	69.2838
IL33	1.54866	3.73555	13.3797	3.17473e-35	3.35819e-33	69.2098
E2F1	-1.16559	3.6181	-13.3539	4.10404e-35	4.30831e-33	68.9555
DTL	-1.03416	2.26039	-13.3502	4.25803e-35	4.43636e-33	68.919
FANCB	-0.670772	0.710987	-13.2851	8.1357e-35	8.41317e-33	68.2778
CBX7	0.87986	3.08237	13.255	1.09696e-34	1.12597e-32	67.9818
E2F8	-1.04609	1.81304	-13.2509	1.1432e-34	1.16481e-32	67.9409
SHCBP1	-1.06056	1.9225	-13.2378	1.30108e-34	1.31599e-32	67.8128
HELLS	-0.862818	1.57121	-13.2181	1.5817e-34	1.58824e-32	67.6194
LMNB1	-1.15224	4.04032	-13.1994	1.90473e-34	1.89883e-32	67.4354
CHAF1A	-0.767009	2.7292	-13.1907	2.07669e-34	2.05548e-32	67.3498
RSPO2	0.890511	0.674427	13.168	2.59976e-34	2.55496e-32	67.1273
GAPDH	-1.0024	8.81612	-13.1366	3.54361e-34	3.45801e-32	66.8206
FAM111B	-1.14012	2.36171	-13.1133	4.46051e-34	4.32232e-32	66.5927
SCN4B	1.07984	1.60766	13.0892	5.65978e-34	5.44636e-32	66.3569
VEPH1	1.46691	1.78756	13.0788	6.27362e-34	5.98122e-32	66.255
MCM2	-1.07098	3.77584	-13.0783	6.30193e-34	5.98122e-32	66.2505
ATP13A4	1.91336	3.17579	13.0714	6.74311e-34	6.35641e-32	66.1835
INCENP	-0.904413	3.05704	-13.0694	6.88372e-34	6.44512e-32	66.1631
SELENBP1	1.63641	5.74113	13.0514	8.21589e-34	7.64078e-32	65.9879
ECT2	-1.11188	3.53518	-13.0242	1.07378e-33	9.91954e-32	65.7228
C1orf116	1.91277	5.7491	12.9483	2.26273e-33	2.07647e-31	64.9848
MND1	-1.08831	1.69163	-12.9177	3.05531e-33	2.78535e-31	64.6874
OIP5	-1.14239	1.56961	-12.8939	3.85836e-33	3.49447e-31	64.4564
CENPK	-0.983151	1.42029	-12.8648	5.12986e-33	4.61587e-31	64.1744
TYMS	-1.09735	3.25318	-12.8523	5.79372e-33	5.17959e-31	64.0539
BLM	-0.844898	1.53991	-12.8477	6.0628e-33	5.3854e-31	64.0089
MGP	1.36617	6.52999	12.8451	6.22119e-33	5.4909e-31	63.9834
SLC22A3	1.82937	3.65809	12.8132	8.49354e-33	7.44905e-31	63.6751
ABI3BP	1.27795	2.38106	12.8113	8.65415e-33	7.54217e-31	63.6566
LMNB2	-0.829956	4.21728	-12.7919	1.0457e-32	9.05639e-31	63.4693
PRG4	1.80956	1.45764	12.7509	1.5592e-32	1.34198e-30	63.0738
KNTC1	-0.865581	2.19024	-12.7427	1.68826e-32	1.44409e-30	62.995
NFIX	1.17124	4.09992	12.7406	1.72287e-32	1.46465e-30	62.9749
MTBP	-0.724498	1.00417	-12.7357	1.80795e-32	1.52761e-30	62.9272
PLA2G4F	1.34591	2.1217	12.6803	3.09807e-32	2.60181e-30	62.394
POLA2	-0.619904	2.74005	-12.6627	3.67392e-32	3.06684e-30	62.2253
FANCA	-0.840904	1.85344	-12.6455	4.3389e-32	3.60025e-30	62.0606
PIF1	-0.868299	1.23487	-12.6411	4.53111e-32	3.73736e-30	62.0177
TIMELESS	-0.842643	3.48578	-12.5761	8.50008e-32	6.96956e-30	61.3949
CENPN	-0.888781	2.14703	-12.5301	1.32509e-31	1.0801e-29	60.9554
RANBP1	-0.696969	4.13878	-12.5	1.77143e-31	1.43548e-29	60.6681
ASPA	0.585301	0.658363	12.498	1.80658e-31	1.45546e-29	60.6486
ITGA8	1.09857	2.40101	12.4896	1.95738e-31	1.56782e-29	60.5693
MS4A2	1.11948	1.69507	12.4633	2.5224e-31	2.00879e-29	60.3182
DUOX1	1.55317	3.11106	12.4474	2.93944e-31	2.32753e-29	60.1668
E2F2	-0.860714	1.60699	-12.4375	3.2341e-31	2.5463e-29	60.0723
DIAPH3	-0.884669	1.1875	-12.427	3.57561e-31	2.79928e-29	59.9729
FAM107A	1.35041	2.26781	12.41	4.21042e-31	3.27774e-29	59.8111
TK1	-1.23668	4.89259	-12.4014	4.57176e-31	3.53915e-29	59.7296
DLC1	1.27956	3.45181	12.4001	4.63231e-31	3.5661e-29	59.7166
ZNF367	-0.820068	1.90089	-12.3866	5.26927e-31	4.03405e-29	59.5891
NPR1	1.12991	2.31954	12.3857	5.31889e-31	4.04966e-29	59.5798
CAT	0.852041	5.15095	12.372	6.06217e-31	4.59035e-29	59.4504
MCM6	-0.834138	4.03373	-12.3597	6.82461e-31	5.1396e-29	59.3331
ACOXL	1.02154	1.43635	12.354	7.20165e-31	5.39423e-29	59.2799
SPARCL1	1.19629	6.7434	12.3379	8.40622e-31	6.26264e-29	59.1268
A2M	1.4179	7.51661	12.3163	1.03314e-30	7.62713e-29	58.9227
RAD54B	-0.612471	0.854094	-12.3162	1.03478e-30	7.62713e-29	58.9212
BRIP1	-0.899491	1.07188	-12.3044	1.15763e-30	8.48745e-29	58.8102
ANKRD44	0.755379	2.16648	12.2783	1.48539e-30	1.08332e-28	58.5634
TBX4	1.16716	2.58741	12.27	1.60818e-30	1.16673e-28	58.4848
PTGDS	1.52394	5.54534	12.1953	3.27677e-30	2.36491e-28	57.7805
RFC5	-0.69207	3.02808	-12.177	3.90197e-30	2.80153e-28	57.6077
CTSH	1.40517	6.5541	12.176	3.93647e-30	2.81174e-28	57.599
TPI1	-0.684269	7.3723	-12.1693	4.19502e-30	2.98104e-28	57.536
CLDN18	2.67441	3.08747	12.1594	4.60898e-30	3.2585e-28	57.4429
CRY2	0.716203	3.77481	12.1324	5.95588e-30	4.18937e-28	57.1892
RNASEH2A	-0.792652	3.7793	-12.1192	6.75198e-30	4.72537e-28	57.0651
CENPH	-0.842333	2.32526	-12.1048	7.73512e-30	5.38621e-28	56.9305
POP1	-0.604019	2.09249	-12.1033	7.84616e-30	5.43621e-28	56.9164
CCNE1	-1.24386	2.35459	-12.0966	8.36083e-30	5.76398e-28	56.8536
CENPM	-1.0034	2.83424	-12.078	9.97049e-30	6.83966e-28	56.6794
CCNF	-0.789915	2.49719	-12.017	1.77471e-29	1.209e-27	56.1088
PLA2G1B	2.06593	2.65435	12.0167	1.77987e-29	1.209e-27	56.106
ZNF540	0.620503	1.12995	12.0132	1.84061e-29	1.24416e-27	56.0728
CACNA2D2	1.99926	3.34958	12.006	1.96904e-29	1.32451e-27	56.006
MCM7	-0.849464	4.82887	-12.0022	2.04058e-29	1.366e-27	55.9707
DSN1	-0.700754	3.62735	-12.0003	2.07802e-29	1.38438e-27	55.9527
C1orf112	-0.672524	1.74897	-11.988	2.33357e-29	1.54719e-27	55.838
CLIC5	1.45139	2.75592	11.9734	2.67685e-29	1.76634e-27	55.7022
FANCG	-0.678654	3.02257	-11.9704	2.75465e-29	1.80906e-27	55.6739
HSD17B6	1.77546	3.59861	11.9564	3.14351e-29	2.0547e-27	55.5432
GINS4	-0.9525	1.49873	-11.9469	3.4365e-29	2.23566e-27	55.455
DTYMK	-0.718839	4.12142	-11.9361	3.80383e-29	2.46307e-27	55.3546
RDM1	-0.791355	0.595459	-11.9301	4.02468e-29	2.59395e-27	55.2987
MTHFD2	-0.926262	4.22125	-11.8837	6.2198e-29	3.99018e-27	54.8681
TUBG1	-0.671738	4.56172	-11.8635	7.51607e-29	4.79955e-27	54.6808
CITED2	1.07984	5.62946	11.8498	8.54803e-29	5.43349e-27	54.5535
GDF10	1.32191	1.62167	11.8419	9.20125e-29	5.822e-27	54.4807
IL6R	0.960886	4.04436	11.8408	9.2957e-29	5.85503e-27	54.4706
SASS6	-0.693828	2.02881	-11.831	1.019e-28	6.3893e-27	54.3797
EMCN	1.08355	2.77307	11.8234	1.09431e-28	6.83057e-27	54.3092
FHL5	0.930755	1.62368	11.8172	1.15927e-28	7.20358e-27	54.2521
NCAPD2	-0.786187	4.07904	-11.7984	1.382e-28	8.54925e-27	54.0783
ANGPT1	1.01546	1.64199	11.792	1.46785e-28	9.03997e-27	54.0187
VRK1	-0.692832	2.88727	-11.7738	1.73887e-28	1.06617e-26	53.8511
KIF18A	-0.885312	1.41092	-11.749	2.19289e-28	1.33863e-26	53.6216
ART4	0.588917	0.592187	11.7183	2.91645e-28	1.77251e-26	53.3395
ATAD2	-0.964274	3.09686	-11.6911	3.75662e-28	2.27317e-26	53.0891
CDC7	-0.838867	2.25423	-11.6402	6.02461e-28	3.6297e-26	52.622
PHACTR1	0.852394	1.58509	11.6302	6.6149e-28	3.96808e-26	52.5295
NR3C2	1.03858	2.59719	11.6273	6.78915e-28	4.05506e-26	52.5038
EDNRB	1.14733	2.31956	11.626	6.87568e-28	4.08911e-26	52.4913
TUBA1C	-0.694192	4.99551	-11.6193	7.31709e-28	4.33303e-26	52.4297
ESCO2	-0.831197	0.688481	-11.6183	7.38105e-28	4.35231e-26	52.4211
RFC2	-0.629541	4.19296	-11.6144	7.6524e-28	4.49319e-26	52.3854
C5orf34	-0.809263	1.37914	-11.6009	8.67627e-28	5.07287e-26	52.2612
LAMP3	1.58072	5.55402	11.5846	1.0089e-27	5.87042e-26	52.112
DNAJC9	-0.55908	2.85373	-11.5842	1.01251e-27	5.87042e-26	52.1085
CCNE2	-0.82365	1.32593	-11.5644	1.21588e-27	7.02018e-26	51.9275
GPR19	-0.680711	0.664826	-11.5536	1.34296e-27	7.72177e-26	51.8291
RBL1	-0.64991	2.10109	-11.5184	1.85798e-27	1.06388e-25	51.5081
AOC3	1.16549	4.2498	11.5074	2.05693e-27	1.17296e-25	51.4075
ABCA3	1.74207	5.19363	11.4382	3.88472e-27	2.20617e-25	50.7787
PGAM5	-0.636238	4.21949	-11.4315	4.13013e-27	2.33597e-25	50.7182
CYBRD1	1.15422	4.92637	11.4137	4.86471e-27	2.74025e-25	50.5563
MACROD2	1.35375	1.80555	11.4089	5.08082e-27	2.8504e-25	50.5133
CLEC3B	1.40686	3.66445	11.3991	5.56175e-27	3.10763e-25	50.4239
CPA3	1.67126	4.51729	11.3923	5.91542e-27	3.29197e-25	50.3629
COL4A3	1.26	2.34806	11.3708	7.20514e-27	3.99366e-25	50.1679
UNG	-0.610388	4.32188	-11.3621	7.80442e-27	4.3086e-25	50.0889
DBF4B	-0.604545	1.87952	-11.3549	8.33393e-27	4.58267e-25	50.024
CHAF1B	-0.780525	2.07401	-11.3302	1.04405e-26	5.71835e-25	49.8012
ATAD5	-0.64522	1.46444	-11.3223	1.1221e-26	6.12163e-25	49.7299
TLR5	0.821609	2.78874	11.3198	1.14759e-26	6.23615e-25	49.7077
VIPR1	1.03281	2.2195	11.3008	1.36481e-26	7.38757e-25	49.5363
HMGB2	-0.832901	4.83343	-11.2875	1.54048e-26	8.30598e-25	49.4166
SLIT3	1.13731	2.57639	11.2869	1.54906e-26	8.31988e-25	49.4111
F11	1.06029	0.412041	11.273	1.75845e-26	9.40804e-25	49.2857
CTSG	1.17173	1.0589	11.2716	1.78138e-26	9.49408e-25	49.2729
ROBO2	0.759185	0.908558	11.2513	2.1422e-26	1.13734e-24	49.0906
E2F7	-0.872008	0.91878	-11.2483	2.20233e-26	1.16037e-24	49.0632
LRRC36	1.119	1.40991	11.2373	2.43203e-26	1.27654e-24	48.9651
PTTG1	-1.08217	3.68507	-11.2293	2.61625e-26	1.36805e-24	48.8929
CENPL	-0.656894	1.92075	-11.2252	2.71532e-26	1.41452e-24	48.8562
POLE	-0.630142	2.39167	-11.1614	4.84333e-26	2.51363e-24	48.2841
PAICS	-0.688361	4.2326	-11.1436	5.68539e-26	2.93964e-24	48.1257
IL6ST	0.770954	4.94047	11.1414	5.80046e-26	2.98799e-24	48.1058
GRIA1	0.616858	0.548244	11.1406	5.84298e-26	2.99875e-24	48.0986
CD300LG	0.526458	0.337881	11.1216	6.93969e-26	3.54846e-24	47.9286
FLRT3	1.46311	3.75716	11.1044	8.10011e-26	4.12659e-24	47.7757
ROS1	1.72435	3.68992	11.09	9.22993e-26	4.68495e-24	47.6467
DPYSL2	0.884971	4.81562	11.0817	9.94276e-26	5.02835e-24	47.5731
CDKL2	1.3225	2.88435	11.0626	1.18072e-25	5.94954e-24	47.4033
FXYD1	0.576756	0.86707	11.0596	1.21264e-25	6.08826e-24	47.3769
GINS3	-0.670538	1.61866	-11.0541	1.27466e-25	6.37654e-24	47.3276
FANCD2	-0.599725	1.90888	-11.0412	1.43093e-25	7.12163e-24	47.2133
CDK2	-0.600155	3.62694	-11.041	1.43389e-25	7.12163e-24	47.2113
CYP27A1	1.10141	4.69653	11.0396	1.45268e-25	7.18919e-24	47.1984
GNG7	0.797085	2.1522	11.0269	1.62761e-25	8.02625e-24	47.086
CAPN3	0.67537	0.918049	10.9919	2.22877e-25	1.09518e-23	46.7753
FOLR1	2.09512	5.72796	10.9835	2.40171e-25	1.17599e-23	46.7015
PTPN13	1.36316	3.31426	10.9642	2.85591e-25	1.39346e-23	46.5303
GFRA1	0.810472	0.275967	10.9543	3.11977e-25	1.51687e-23	46.4429
PCNA	-0.715881	5.59365	-10.9491	3.26982e-25	1.58426e-23	46.3965
RFC3	-0.702037	2.8544	-10.9453	3.38116e-25	1.6325e-23	46.3634
METTL7A	0.987565	4.53477	10.9364	3.66126e-25	1.7616e-23	46.2848
PLLP	1.02363	2.64846	10.9177	4.32905e-25	2.0757e-23	46.1192
SHMT2	-0.732056	4.76042	-10.9126	4.5285e-25	2.16384e-23	46.0747
F8	0.659072	2.19621	10.91	4.63676e-25	2.20796e-23	46.0513
FMO2	1.19527	3.46259	10.8921	5.43778e-25	2.58053e-23	45.8939
LGI3	1.26291	1.11603	10.8661	6.85715e-25	3.24299e-23	45.6647
WDR76	-0.748103	2.17857	-10.8553	7.54759e-25	3.54674e-23	45.5699
SHROOM4	0.831237	2.34184	10.8553	7.55062e-25	3.54674e-23	45.5695
CA3	1.14306	1.75558	10.8434	8.39302e-25	3.92913e-23	45.4649
SLC39A8	1.07359	4.53297	10.8427	8.44694e-25	3.94105e-23	45.4586
PRTFDC1	-0.920144	2.93449	-10.8314	9.33662e-25	4.34153e-23	45.3597
FRMD4B	0.608143	2.84988	10.8032	1.19939e-24	5.55851e-23	45.1122
CKAP2	-0.725605	2.99377	-10.7692	1.62152e-24	7.4808e-23	44.8142
PPP2R5A	0.640489	5.11622	10.7689	1.62497e-24	7.4808e-23	44.8121
GPD1L	0.85784	4.24083	10.7626	1.71855e-24	7.88543e-23	44.7568
PDSS1	-0.600458	2.30266	-10.7299	2.29447e-24	1.04587e-22	44.4712
SCGB3A1	2.94126	6.32612	10.6999	2.98947e-24	1.35376e-22	44.2098
AKAP13	0.715211	4.27974	10.683	3.47198e-24	1.56714e-22	44.062
HMGA1	-0.991365	6.53493	-10.6392	5.10322e-24	2.29595e-22	43.6815
FIGNL1	-0.687811	2.56922	-10.634	5.34386e-24	2.39644e-22	43.636
RHOBTB2	1.19045	4.68951	10.6318	5.4475e-24	2.43503e-22	43.617
RAN	-0.549315	5.59341	-10.6232	5.87453e-24	2.61747e-22	43.5425
RIC3	0.713748	0.846068	10.6119	6.48804e-24	2.88156e-22	43.4443
TCF19	-0.731423	3.38365	-10.602	7.07695e-24	3.13308e-22	43.3585
TMPRSS2	1.40821	4.93522	10.5834	8.32714e-24	3.66315e-22	43.1978
SLC2A1	-1.36923	4.89486	-10.5797	8.60313e-24	3.77258e-22	43.1656
PLOD2	-1.2865	4.06766	-10.5517	1.09923e-23	4.80505e-22	42.9235
CACHD1	1.16126	2.53299	10.5374	1.24505e-23	5.42536e-22	42.8005
CALCOCO1	0.581602	3.95913	10.5316	1.3096e-23	5.68877e-22	42.7506
PRX	0.876503	2.2413	10.5212	1.43378e-23	6.20873e-22	42.6611
SNX25	0.79386	3.62328	10.5131	1.53988e-23	6.62779e-22	42.5906
TGFBR3	0.895014	1.83173	10.513	1.54012e-23	6.62779e-22	42.5904
MYOCD	0.501959	0.569911	10.5067	1.62742e-23	6.98177e-22	42.536
LRP2BP	0.528848	1.10343	10.4936	1.82411e-23	7.80145e-22	42.4233
LPAL2	0.642303	1.0003	10.4901	1.88072e-23	8.01883e-22	42.3931
SKP2	-0.78145	2.78844	-10.4812	2.03248e-23	8.6393e-22	42.3164
UBL3	0.646103	4.50168	10.4788	2.07645e-23	8.79919e-22	42.2953
LEFTY2	0.777147	0.470285	10.4419	2.86052e-23	1.20848e-21	41.9789
MMRN1	0.995077	1.99698	10.4293	3.1921e-23	1.34447e-21	41.8706
CD1C	1.2731	2.51477	10.4278	3.23392e-23	1.35795e-21	41.8578
TLR2	1.00837	4.58806	10.4096	3.78588e-23	1.58015e-21	41.7021
SGCA	1.01239	2.38182	10.4089	3.8099e-23	1.5854e-21	41.6959
ESAM	0.88882	4.7093	10.4034	3.99576e-23	1.65776e-21	41.6489
TOPBP1	-0.610287	3.32886	-10.3991	4.14907e-23	1.71623e-21	41.6117
ZBTB4	0.583871	4.96031	10.3849	4.68827e-23	1.93349e-21	41.491
PIK3IP1	0.713785	4.66279	10.384	4.72524e-23	1.94296e-21	41.4833
CYB5A	1.02006	4.70244	10.3828	4.77812e-23	1.95889e-21	41.4723
RCOR2	-1.12056	1.97337	-10.3808	4.85769e-23	1.98564e-21	41.456
SV2A	-1.03186	1.77196	-10.3726	5.21473e-23	2.12531e-21	41.3859
HYLS1	-0.633326	2.10045	-10.3708	5.29877e-23	2.15323e-21	41.3701
SNRPF	-0.627391	4.09189	-10.3665	5.49925e-23	2.22816e-21	41.3335
PHF19	-0.568893	2.89143	-10.3609	5.77175e-23	2.33175e-21	41.2857
COL4A4	1.09155	2.77057	10.3598	5.82608e-23	2.34686e-21	41.2765
UCK2	-0.964685	2.65479	-10.3519	6.23982e-23	2.50624e-21	41.2087
TMEM37	1.11358	3.69871	10.3502	6.33358e-23	2.53654e-21	41.194
CFD	1.33069	4.66492	10.3492	6.38427e-23	2.54947e-21	41.1861
CPAMD8	1.37432	2.6159	10.3473	6.49014e-23	2.58431e-21	41.1699
PPAT	-0.692837	2.61524	-10.3427	6.75212e-23	2.67326e-21	41.1308
EIF4EBP1	-1.01534	5.20209	-10.3296	7.5641e-23	2.97772e-21	41.0187
PFKFB4	-0.788717	2.05426	-10.3214	8.12035e-23	3.18764e-21	40.9486
DNMT3B	-0.859541	1.19105	-10.3065	9.22972e-23	3.61289e-21	40.8222
DES	1.49842	2.89933	10.3061	9.26451e-23	3.61629e-21	40.8184
MCM8	-0.656475	2.11241	-10.3008	9.69821e-23	3.77495e-21	40.7733
DONSON	-0.599226	2.70692	-10.2994	9.80806e-23	3.80701e-21	40.7621
TMEM100	1.37566	2.09444	10.2974	9.98122e-23	3.8634e-21	40.7449
FCGRT	0.67775	6.05737	10.2786	1.17357e-22	4.52986e-21	40.585
GNPNAT1	-0.703811	3.78458	-10.2756	1.20461e-22	4.63673e-21	40.5592
TPSAB1	1.34024	4.3028	10.2748	1.21205e-22	4.65245e-21	40.5531
ELN	1.30791	4.36707	10.2707	1.25636e-22	4.80922e-21	40.5177
WDR62	-0.817886	1.64061	-10.2585	1.39441e-22	5.32297e-21	40.4147
ACADL	0.972065	1.28785	10.2546	1.4421e-22	5.48987e-21	40.3815
CEBPA	1.15162	3.74306	10.2531	1.46078e-22	5.54576e-21	40.3688
CD302	0.896836	2.9254	10.2488	1.51629e-22	5.74077e-21	40.332
JAM2	0.740097	2.22993	10.2375	1.67043e-22	6.30711e-21	40.2364
SLC41A1	0.646844	3.76488	10.2272	1.82423e-22	6.86914e-21	40.1495
TNNC1	1.36313	2.97793	10.2157	2.01261e-22	7.55791e-21	40.0524
CKS1B	-0.811284	3.84809	-10.2126	2.06699e-22	7.74116e-21	40.0261
RASGRF1	1.15099	1.61461	10.2118	2.08176e-22	7.77544e-21	40.0191
WASF1	-0.829902	2.24062	-10.2096	2.12206e-22	7.90466e-21	40.0002
CA4	1.15893	1.21284	10.2063	2.18155e-22	8.1045e-21	39.9729
ITIH5	0.924669	1.71334	10.1995	2.31271e-22	8.56878e-21	39.9152
TNS1	0.860322	4.50396	10.1947	2.40942e-22	8.90328e-21	39.8748
HHIP	1.31104	1.13552	10.1879	2.55443e-22	9.41404e-21	39.8171
PKNOX2	0.699517	0.991603	10.1809	2.71265e-22	9.94423e-21	39.7578
FCER1A	1.55899	2.90284	10.1739	2.87917e-22	1.05268e-20	39.6989
NME1	-0.708815	4.44577	-10.169	3.00073e-22	1.09424e-20	39.6581
CD1E	1.13758	1.6034	10.1638	3.13712e-22	1.14097e-20	39.6142
CSE1L	-0.587636	4.75522	-10.1412	3.80622e-22	1.3807e-20	39.4234
AQP1	1.59182	6.84146	10.1392	3.87017e-22	1.39659e-20	39.407
HLA-DMA	0.976206	6.69541	10.1311	4.14717e-22	1.48879e-20	39.3387
VAMP2	0.558347	4.81691	10.1116	4.8984e-22	1.74941e-20	39.1744
TOMM40	-0.582731	4.58574	-10.1007	5.37198e-22	1.91361e-20	39.0833
TEK	0.821393	2.35335	10.0949	5.6461e-22	2.0061e-20	39.0342
ABCC6	0.915633	2.48604	10.0907	5.84995e-22	2.07321e-20	38.9992
CCT5	-0.644998	5.38477	-10.074	6.74311e-22	2.37759e-20	38.8589
PSAT1	-1.25494	3.37653	-10.0721	6.85098e-22	2.40949e-20	38.8432
SNRPD1	-0.553771	3.77436	-10.0602	7.57576e-22	2.65765e-20	38.744
SHH	1.04812	1.6243	10.0282	9.94189e-22	3.47014e-20	38.4757
CLEC14A	0.830282	4.74371	10.0215	1.05213e-21	3.66316e-20	38.4198
GMPS	-0.571904	3.48802	-10.02	1.06508e-21	3.69895e-20	38.4077
PAK1IP1	-0.565399	4.1444	-10.0193	1.07122e-21	3.71096e-20	38.4021
CCT6A	-0.633292	5.77477	-10.0125	1.13522e-21	3.92289e-20	38.3448
SLC40A1	1.06591	5.90416	10.0056	1.20267e-21	4.13741e-20	38.2878
LAMA2	0.860935	2.95317	10.0056	1.20327e-21	4.13741e-20	38.2873
XPOT	-0.606759	4.19336	-9.99695	1.29426e-21	4.43925e-20	38.2154
EPHX2	0.858269	2.52577	9.99607	1.30392e-21	4.46135e-20	38.2081
HDAC2	-0.533176	3.32997	-9.99235	1.34555e-21	4.59245e-20	38.177
CDH24	-0.945908	3.16029	-9.98636	1.41543e-21	4.81908e-20	38.1271
CCND3	0.753944	4.82965	9.9593	1.77823e-21	6.03946e-20	37.9019
KIF3C	-0.910296	2.46477	-9.95671	1.81747e-21	6.15763e-20	37.8804
HSD17B4	0.554104	4.34701	9.95627	1.82411e-21	6.16503e-20	37.8768
MEF2C	0.739703	2.79878	9.95044	1.91596e-21	6.45974e-20	37.8283
DKC1	-0.503892	4.53385	-9.94439	2.01605e-21	6.78067e-20	37.778
WIF1	2.08332	2.97796	9.93475	2.18637e-21	7.33572e-20	37.698
RAI2	0.837076	3.07465	9.9181	2.51485e-21	8.41744e-20	37.5599
FCN3	1.36559	3.05022	9.91391	2.60496e-21	8.69806e-20	37.5251
SUV39H2	-0.575964	2.36861	-9.91157	2.65678e-21	8.84976e-20	37.5057
HLA-DPB1	1.03785	7.80844	9.90772	2.74413e-21	9.11882e-20	37.4738
TMEM125	1.06248	6.30655	9.90713	2.75774e-21	9.12618e-20	37.4689
DMBT1	2.28224	4.228	9.90705	2.75952e-21	9.12618e-20	37.4683
STMN1	-0.897936	4.47994	-9.90474	2.81356e-21	9.28274e-20	37.4491
CCDC86	-0.535577	3.95185	-9.89839	2.96768e-21	9.76798e-20	37.3965
TOB1	0.799777	5.08653	9.89587	3.03086e-21	9.95227e-20	37.3757
CKS2	-0.877325	5.20426	-9.89554	3.03946e-21	9.95692e-20	37.3729
TMEM87A	0.521887	5.03318	9.88554	3.30542e-21	1.08027e-19	37.2902
DOK4	0.986779	4.15895	9.88113	3.42981e-21	1.11828e-19	37.2537
PRIM1	-0.70972	2.35888	-9.87525	3.60309e-21	1.17202e-19	37.2051
CHEK2	-0.684262	2.7581	-9.85917	4.1222e-21	1.33774e-19	37.0723
ALDH2	0.880768	5.36521	9.85464	4.28167e-21	1.38624e-19	37.0348
SESN1	0.613447	2.75938	9.85243	4.36159e-21	1.40883e-19	37.0166
POP7	-0.571334	5.04702	-9.82718	5.38656e-21	1.73585e-19	36.8083
DPEP2	0.750818	2.2214	9.82116	5.66382e-21	1.82097e-19	36.7588
CNTN6	0.673531	0.65345	9.81894	5.77011e-21	1.85084e-19	36.7405
SFTPB	2.43521	9.96955	9.81659	5.88422e-21	1.88309e-19	36.7211
CASQ2	0.636634	0.812107	9.81285	6.07059e-21	1.93825e-19	36.6904
GATA6	1.01738	2.82215	9.80986	6.22438e-21	1.98279e-19	36.6657
C19orf48	-0.694915	4.19257	-9.7847	7.67605e-21	2.43403e-19	36.4589
SLC26A9	1.8266	3.67378	9.78194	7.85474e-21	2.485e-19	36.4362
ST6GALNAC6	0.566446	4.25262	9.77789	8.12427e-21	2.56442e-19	36.4029
MRPL47	-0.542768	4.81107	-9.77558	8.28171e-21	2.60817e-19	36.384
CTSO	0.685382	4.82555	9.77086	8.61331e-21	2.70645e-19	36.3452
DUSP1	1.17004	7.38524	9.767	8.89445e-21	2.78847e-19	36.3136
SLC12A8	-0.739065	3.19295	-9.76518	9.03046e-21	2.81836e-19	36.2986
CLU	1.46631	5.49932	9.75018	1.02295e-20	3.18541e-19	36.1756
RBPMS	0.852199	3.90864	9.73023	1.20719e-20	3.74228e-19	36.0122
EMP2	0.881889	5.10852	9.72811	1.22863e-20	3.80024e-19	35.9949
YKT6	-0.507615	5.35031	-9.72732	1.23665e-20	3.81177e-19	35.9885
RBL2	0.523203	4.20921	9.72721	1.23786e-20	3.81177e-19	35.9875
PUS1	-0.551836	2.98618	-9.72347	1.27682e-20	3.91312e-19	35.9569
CPB2	1.65202	1.16886	9.72334	1.27819e-20	3.91312e-19	35.9559
SELP	0.909432	2.54844	9.72324	1.27924e-20	3.91312e-19	35.9551
CLEC4F	0.547035	0.675112	9.72014	1.31252e-20	4.00608e-19	35.9297
TMEM163	1.23227	3.23655	9.71814	1.33453e-20	4.0643e-19	35.9133
HPRT1	-0.621403	4.70622	-9.70982	1.42981e-20	4.34494e-19	35.8453
BTBD9	0.707063	3.49696	9.70594	1.47651e-20	4.47703e-19	35.8136
SPATA18	1.11909	2.06861	9.70022	1.54807e-20	4.68374e-19	35.7669
LRRN3	0.643453	0.98803	9.69894	1.56457e-20	4.72336e-19	35.7565
GTF2IRD1	-0.519169	3.22789	-9.68167	1.80489e-20	5.40181e-19	35.6155
HDC	0.877512	1.75492	9.68121	1.81186e-20	5.41097e-19	35.6117
ACTL6A	-0.568526	4.35847	-9.68001	1.82988e-20	5.45304e-19	35.602
NOSTRIN	0.884888	2.38179	9.66995	1.98855e-20	5.91316e-19	35.5199
FUCA1	0.719371	6.22304	9.65808	2.19329e-20	6.50802e-19	35.4233
HNMT	0.779096	3.99679	9.65376	2.27295e-20	6.72998e-19	35.3881
LDB2	0.722306	2.7559	9.64816	2.38037e-20	7.033e-19	35.3426
HSPD1	-0.595489	6.09588	-9.6296	2.77393e-20	8.17836e-19	35.1917
B3GNT4	-0.679408	1.04621	-9.62434	2.89689e-20	8.52277e-19	35.1489
NAPSA	2.10643	8.38236	9.61113	3.22963e-20	9.48157e-19	35.0416
TRIM59	-0.582875	1.75872	-9.58491	4.00662e-20	1.17378e-18	34.829
ALPL	1.65647	4.87032	9.5661	4.6754e-20	1.36681e-18	34.6768
SUV39H1	-0.562331	2.55032	-9.56019	4.90731e-20	1.43159e-18	34.6291
C18orf54	-0.558178	1.06773	-9.55299	5.20591e-20	1.51233e-18	34.5708
VSIG2	1.69056	4.07488	9.55165	5.26314e-20	1.52576e-18	34.5601
NUDT1	-0.616013	3.45287	-9.54411	5.59859e-20	1.61962e-18	34.4991
SLPI	1.77425	8.26352	9.54276	5.66074e-20	1.63418e-18	34.4882
TSPAN4	0.739299	4.00067	9.51675	7.00298e-20	2.00911e-18	34.2784
C9orf40	-0.600831	1.88795	-9.51394	7.16596e-20	2.05163e-18	34.2558
STC1	-1.18242	3.15463	-9.50874	7.4767e-20	2.13618e-18	34.2139
SCARA5	1.10312	1.40727	9.49968	8.05106e-20	2.29083e-18	34.1409
SMC2	-0.624517	2.52239	-9.49785	8.17253e-20	2.31387e-18	34.1262
HAS3	1.36866	3.20642	9.4977	8.18212e-20	2.31387e-18	34.125
MEX3D	-0.660277	4.18515	-9.49185	8.58201e-20	2.42201e-18	34.078
RFTN1	0.87298	4.43348	9.4914	8.6138e-20	2.42605e-18	34.0743
SYNE1	0.719633	2.40906	9.48837	8.82948e-20	2.48175e-18	34.0499
SSX2IP	-0.641474	1.88653	-9.48444	9.11716e-20	2.55742e-18	34.0183
CISH	0.857332	3.94045	9.48368	9.17363e-20	2.56806e-18	34.0122
MAP6D1	-0.639822	1.42715	-9.48118	9.36245e-20	2.61563e-18	33.9921
TBX2	0.845996	2.95015	9.48081	9.39082e-20	2.61828e-18	33.9892
TMPO	-0.621086	3.91912	-9.46865	1.03693e-19	2.88528e-18	33.8914
RAMP3	0.86885	3.84264	9.46728	1.04854e-19	2.91173e-18	33.8805
NPC2	0.964517	7.7184	9.46257	1.08958e-19	3.00764e-18	33.8426
ALDH5A1	0.680587	3.36503	9.46224	1.09252e-19	3.00975e-18	33.8399
CRTAC1	1.56696	3.2578	9.45989	1.11363e-19	3.06181e-18	33.8211
RSPO1	0.568515	0.682072	9.45885	1.1231e-19	3.08174e-18	33.8127
BOP1	-0.764983	4.5083	-9.44997	1.20723e-19	3.29951e-18	33.7415
BRCA2	-0.529092	1.11814	-9.44295	1.27809e-19	3.48632e-18	33.6853
RAB3B	-0.956572	0.563142	-9.44129	1.29545e-19	3.52673e-18	33.672
COLEC12	1.06655	2.9055	9.44104	1.29811e-19	3.52705e-18	33.67
CGNL1	0.839313	3.08339	9.42551	1.47275e-19	3.99373e-18	33.5455
TAPT1	0.565871	3.15406	9.42242	1.51018e-19	4.08721e-18	33.5208
BRI3BP	-0.593818	3.1431	-9.42165	1.51957e-19	4.10462e-18	33.5147
ST3GAL5	1.05371	4.43677	9.41588	1.59244e-19	4.28474e-18	33.4685
EGLN3	-1.33787	3.30699	-9.4115	1.65e-19	4.43101e-18	33.4335
FABP4	1.39738	2.53137	9.40369	1.75799e-19	4.70278e-18	33.371
CD40LG	0.712632	1.57726	9.39635	1.86576e-19	4.97052e-18	33.3123
DAPK1	0.809656	4.04579	9.3959	1.87247e-19	4.97066e-18	33.3088
RRM1	-0.505349	4.20898	-9.38794	1.99721e-19	5.27729e-18	33.2452
GNG4	-1.37287	1.11231	-9.38781	1.99941e-19	5.27729e-18	33.2442
MMP28	1.60571	3.41424	9.38653	2.0202e-19	5.32204e-18	33.234
NUP37	-0.504956	3.03459	-9.3852	2.04199e-19	5.36923e-18	33.2234
C4BPA	2.09296	5.90459	9.38229	2.0907e-19	5.4869e-18	33.2001
CYCS	-0.54503	5.01497	-9.37041	2.30158e-19	6.02891e-18	33.1054
NCAPD3	-0.53244	2.64506	-9.36945	2.31957e-19	6.06458e-18	33.0977
ZNF695	-0.686954	0.248779	-9.36752	2.3561e-19	6.14849e-18	33.0823
HLA-DOA	1.04855	4.67198	9.36579	2.3892e-19	6.22314e-18	33.0686
SYNJ2	-0.556618	2.49761	-9.36544	2.39601e-19	6.22917e-18	33.0658
C3	1.35045	6.72909	9.36335	2.43686e-19	6.32352e-18	33.0491
ECE2	-0.672502	2.14488	-9.36135	2.47659e-19	6.41459e-18	33.0332
CCDC69	0.763994	3.87908	9.35805	2.5435e-19	6.5756e-18	33.0069
BOLA3	-0.567015	2.89806	-9.35709	2.56323e-19	6.61428e-18	32.9993
TGFBR2	0.735632	5.62665	9.35494	2.60827e-19	6.718e-18	32.9821
HOPX	1.50345	6.07082	9.35243	2.66157e-19	6.84257e-18	32.9622
FOS	1.24524	6.63279	9.34498	2.82671e-19	7.25366e-18	32.9028
RCAN2	0.948695	3.13093	9.33164	3.14799e-19	8.06315e-18	32.7967
TUBA1B	-0.593025	5.9807	-9.33132	3.15604e-19	8.06885e-18	32.7942
ADRB2	0.854657	1.91629	9.32982	3.1945e-19	8.15215e-18	32.7823
COL11A1	-1.83746	3.11805	-9.32101	3.42965e-19	8.73616e-18	32.7123
IGF2BP3	-1.2423	1.21047	-9.31736	3.53178e-19	8.9798e-18	32.6834
ERBB4	0.542548	0.526085	9.31548	3.58588e-19	9.08402e-18	32.6684
GMNN	-0.658741	3.19704	-9.31287	3.66197e-19	9.25985e-18	32.6477
ZBTB16	1.04096	1.46499	9.30474	3.90962e-19	9.86302e-18	32.5832
CCDC34	-0.731365	2.46911	-9.30458	3.91475e-19	9.86302e-18	32.5819
MASTL	-0.558148	2.72015	-9.29832	4.11682e-19	1.03159e-17	32.5323
ZFP36	1.04381	7.19589	9.27824	4.83812e-19	1.20579e-17	32.3732
AGTR2	1.37662	1.45546	9.2771	4.88271e-19	1.21472e-17	32.3641
ADHFE1	0.752832	1.77072	9.2708	5.13588e-19	1.27326e-17	32.3143
ARHGAP24	0.558588	2.22928	9.27079	5.13639e-19	1.27326e-17	32.3142
PDZD2	0.8904	1.88125	9.26155	5.53182e-19	1.36883e-17	32.2411
MAOB	1.03949	3.40657	9.25733	5.72245e-19	1.41348e-17	32.2077
MEGF6	0.899524	3.43881	9.24956	6.09001e-19	1.50159e-17	32.1464
TPPP3	1.33966	4.4243	9.24539	6.29732e-19	1.54995e-17	32.1134
REEP2	-0.610993	0.992261	-9.2408	6.53286e-19	1.60507e-17	32.0772
NXPH4	-1.27528	1.61724	-9.23245	6.98476e-19	1.71306e-17	32.0113
SNRPB	-0.582931	6.61243	-9.21764	7.86335e-19	1.92513e-17	31.8946
STC2	-1.03469	1.86607	-9.20873	8.44407e-19	2.06366e-17	31.8243
ADAMTSL3	0.703594	1.48727	9.20543	8.66952e-19	2.11503e-17	31.7984
THOP1	-0.500898	2.96727	-9.19784	9.21162e-19	2.23939e-17	31.7386
TMEM158	-0.991992	1.65289	-9.18378	1.03049e-18	2.49206e-17	31.6281
SPHK1	-0.946078	2.65104	-9.16973	1.1526e-18	2.77767e-17	31.5178
NEDD9	0.945532	4.24304	9.16847	1.16431e-18	2.79615e-17	31.5078
RTN4RL1	0.976979	1.29204	9.15686	1.27701e-18	3.06151e-17	31.4168
ITM2A	0.913913	3.41923	9.14481	1.4055e-18	3.35795e-17	31.3223
PECAM1	0.639736	5.49148	9.13769	1.48737e-18	3.54742e-17	31.2666
CHIA	1.54484	2.05428	9.13288	1.5453e-18	3.67925e-17	31.2289
CTDSPL	0.58675	3.88093	9.12878	1.59657e-18	3.79479e-17	31.1968
ITGA9	0.826349	3.03044	9.12683	1.62141e-18	3.84723e-17	31.1815
PPP1R14B	-0.602744	5.98208	-9.11867	1.72994e-18	4.09775e-17	31.1177
DNASE1L3	0.909323	1.4267	9.10527	1.92395e-18	4.54952e-17	31.013
IFT57	0.843099	4.96474	9.10031	2.00109e-18	4.72386e-17	30.9743
LIMD1	0.560365	3.17642	9.09619	2.06748e-18	4.87229e-17	30.9421
VWF	0.921919	5.28966	9.09535	2.08138e-18	4.89673e-17	30.9355
PID1	1.01134	3.00488	9.08982	2.17455e-18	5.10725e-17	30.8924
ASNS	-0.731312	3.53295	-9.07281	2.48777e-18	5.81332e-17	30.7598
CXCL16	0.671154	6.07824	9.05735	2.81123e-18	6.5471e-17	30.6394
TACC1	0.689137	3.87417	9.05463	2.87237e-18	6.67827e-17	30.6182
OGN	1.10018	1.61187	9.04721	3.04553e-18	7.06901e-17	30.5606
PTPRM	0.733069	3.27155	9.04245	3.16216e-18	7.31519e-17	30.5236
PAX9	-1.09659	1.91034	-9.04149	3.18617e-18	7.35846e-17	30.5161
NTN4	0.926151	3.93617	9.02403	3.65638e-18	8.43037e-17	30.3805
PFN2	-1.14211	4.63656	-9.02287	3.68984e-18	8.49338e-17	30.3715
PTK2B	0.577475	3.61116	9.00511	4.24387e-18	9.75247e-17	30.2338
PRIM2	-0.507575	2.3886	-8.98475	4.98023e-18	1.14068e-16	30.0762
CTHRC1	-1.18981	5.46399	-8.98005	5.16768e-18	1.18166e-16	30.0398
MGLL	0.911361	4.89621	8.96708	5.72141e-18	1.30397e-16	29.9396
BTG2	0.922653	5.99492	8.94833	6.62679e-18	1.5029e-16	29.7949
SLC15A2	0.942477	2.89141	8.94046	7.0484e-18	1.59591e-16	29.7341
YEATS2	-0.526202	3.12463	-8.94019	7.06312e-18	1.59663e-16	29.7321
NRM	-0.58468	3.57939	-8.93688	7.24837e-18	1.63584e-16	29.7066
MYBL1	-0.635693	1.22728	-8.93288	7.47881e-18	1.6851e-16	29.6758
C5orf38	1.30453	2.40859	8.93122	7.57662e-18	1.70437e-16	29.663
COL14A1	1.04474	3.09563	8.91389	8.67543e-18	1.94523e-16	29.5296
MEST	-0.712199	4.34628	-8.90384	9.3842e-18	2.10076e-16	29.4523
MCM3	-0.536173	4.98807	-8.90103	9.59196e-18	2.1438e-16	29.4307
SIGLEC6	0.549354	0.863803	8.89714	9.88783e-18	2.20282e-16	29.4008
PFKP	-0.915088	5.13839	-8.86221	1.29799e-17	2.87779e-16	29.1329
FAM24B	-0.625052	1.88247	-8.86178	1.30227e-17	2.88268e-16	29.1297
MT1H	-1.03158	1.21876	-8.8553	1.36962e-17	3.02694e-16	29.08
MAGI3	0.697714	3.34071	8.84599	1.47238e-17	3.24368e-16	29.0088
ADAM12	-1.04355	2.1219	-8.83963	1.54688e-17	3.40198e-16	28.9602
HSPE1	-0.515914	5.50442	-8.83945	1.54914e-17	3.40198e-16	28.9588
CYYR1	0.649698	3.01003	8.83364	1.62055e-17	3.54848e-16	28.9144
RBMS3	0.667387	2.10357	8.83087	1.6557e-17	3.61878e-16	28.8933
MYL6B	-0.548249	3.90162	-8.82725	1.70299e-17	3.71627e-16	28.8656
GSTM5	0.503342	1.16217	8.82547	1.72663e-17	3.76194e-16	28.852
PGM5	0.774006	1.79608	8.82428	1.74261e-17	3.7908e-16	28.8429
SAP30	-0.573012	2.83308	-8.81592	1.85927e-17	4.03823e-16	28.7791
MRPL15	-0.562956	5.46512	-8.81551	1.86521e-17	4.04478e-16	28.776
DDX11	-0.646513	2.58273	-8.81234	1.91152e-17	4.13228e-16	28.7518
ASAH1	0.678456	6.48004	8.81163	1.92219e-17	4.14887e-16	28.7464
TUBB3	-0.935193	1.85936	-8.79499	2.18644e-17	4.69729e-16	28.6196
SYNPO	0.675953	4.42764	8.78877	2.2941e-17	4.91334e-16	28.5723
GPI	-0.53356	5.54691	-8.78052	2.4453e-17	5.22103e-16	28.5094
CD3EAP	-0.524712	2.05217	-8.77868	2.48025e-17	5.27938e-16	28.4955
SVEP1	0.783096	1.88361	8.77774	2.49834e-17	5.30973e-16	28.4883
TMEM63B	0.596272	5.33851	8.77577	2.53671e-17	5.38302e-16	28.4733
KLF15	1.00197	2.20678	8.76853	2.68261e-17	5.67527e-16	28.4183
SLIT2	0.769559	2.82121	8.76219	2.81705e-17	5.95058e-16	28.3701
CDK5R1	-0.662875	1.81195	-8.75232	3.03999e-17	6.41174e-16	28.2952
TEAD4	-0.614283	3.16747	-8.74668	3.17491e-17	6.68614e-16	28.2524
CD81	0.522207	6.43848	8.72609	3.72037e-17	7.82294e-16	28.0964
ERG	0.552966	2.34086	8.72359	3.79261e-17	7.96277e-16	28.0774
LOXL2	-1.02872	3.38075	-8.72164	3.85002e-17	8.07106e-16	28.0627
SLC6A8	-0.981556	3.3024	-8.71946	3.91502e-17	8.19493e-16	28.0462
RASGRP2	0.718293	2.03053	8.7191	3.92576e-17	8.20502e-16	28.0435
IRX2	1.63435	3.2178	8.71853	3.94306e-17	8.21638e-16	28.0392
PGC	2.89055	4.87397	8.70424	4.40087e-17	9.11552e-16	27.9311
SLC27A1	0.601703	3.17059	8.70089	4.51531e-17	9.3386e-16	27.9058
ECHDC2	0.631167	3.58799	8.69006	4.90683e-17	1.01332e-15	27.824
SMARCA2	0.575749	4.18765	8.68971	4.92004e-17	1.01454e-15	27.8213
PXMP4	0.843347	3.47223	8.68231	5.20713e-17	1.07055e-15	27.7655
EFEMP1	0.955549	5.28344	8.68107	5.25703e-17	1.07921e-15	27.7561
NOD1	0.570088	3.09472	8.67786	5.38793e-17	1.10281e-15	27.7319
CALU	-0.58658	6.0281	-8.67116	5.6716e-17	1.15916e-15	27.6814
CLCN2	-0.539974	2.21018	-8.66996	5.72415e-17	1.16818e-15	27.6723
SLC7A5	-0.976833	4.69438	-8.66787	5.81614e-17	1.18521e-15	27.6567
CIRBP	0.565389	5.42505	8.66146	6.10862e-17	1.24298e-15	27.6084
TRIM22	0.748268	4.64775	8.65468	6.43406e-17	1.30728e-15	27.5573
NUP107	-0.550599	3.15911	-8.64977	6.68033e-17	1.35335e-15	27.5203
FOXF1	0.703253	2.49325	8.62991	7.77459e-17	1.56816e-15	27.3711
MCM5	-0.508262	3.58681	-8.61669	8.59911e-17	1.72943e-15	27.2719
SEC61G	-0.566554	5.34196	-8.60231	9.5951e-17	1.92138e-15	27.1641
CHI3L2	1.19517	2.72802	8.59586	1.00779e-16	2.01514e-15	27.1158
KCND2	-0.726609	1.20663	-8.58297	1.11166e-16	2.21644e-15	27.0193
KCND3	0.679341	1.37504	8.58204	1.11954e-16	2.22895e-15	27.0123
FBLN5	0.835629	4.02262	8.58142	1.12478e-16	2.23512e-15	27.0077
HNF1B	1.01427	3.24855	8.5813	1.12587e-16	2.23512e-15	27.0068
MMP12	-1.69746	4.18904	-8.57159	1.212e-16	2.39117e-15	26.9342
TSC22D3	0.845952	6.01577	8.55459	1.37893e-16	2.70649e-15	26.8073
CST5	0.757849	0.929996	8.55032	1.42431e-16	2.7916e-15	26.7755
SCGB1A1	2.77528	5.26925	8.53837	1.55927e-16	3.04751e-15	26.6864
FAM117A	0.514903	3.32899	8.5373	1.57197e-16	3.068e-15	26.6784
CALCRL	0.783598	3.41251	8.53447	1.60604e-16	3.13008e-15	26.6573
DAPK2	0.678371	2.24947	8.53152	1.64237e-16	3.19638e-15	26.6353
RNASE1	1.13149	8.49011	8.52516	1.72326e-16	3.34443e-15	26.588
RERG	0.791047	2.2042	8.52446	1.73247e-16	3.35759e-15	26.5828
SLC34A2	1.50989	8.36151	8.52342	1.74611e-16	3.37932e-15	26.5751
RPS6KA2	0.733196	4.67209	8.52116	1.77622e-16	3.43278e-15	26.5583
ATOH8	1.27704	2.7516	8.52025	1.78854e-16	3.44883e-15	26.5515
PIGR	2.07977	6.56149	8.51751	1.82598e-16	3.51425e-15	26.5311
SCARF1	0.665432	3.00352	8.50493	2.00809e-16	3.84338e-15	26.4376
SEMA5B	-0.598239	0.911604	-8.49798	2.11616e-16	4.03352e-15	26.386
KREMEN2	-0.810682	0.649652	-8.49309	2.19583e-16	4.17961e-15	26.3497
C8orf34	0.532384	0.851836	8.48343	2.36171e-16	4.48305e-15	26.278
CD52	0.946349	5.88211	8.47083	2.59686e-16	4.89588e-15	26.1847
RAB27A	0.619722	4.17587	8.46735	2.66587e-16	5.01915e-15	26.1589
STEAP4	1.24119	4.59936	8.46609	2.69122e-16	5.06001e-15	26.1496
TEF	0.655127	3.41619	8.46283	2.75814e-16	5.1788e-15	26.1254
ZMYND15	0.604436	2.51692	8.45898	2.83903e-16	5.32348e-15	26.097
SPOCK1	-1.21314	1.41225	-8.45682	2.8856e-16	5.40348e-15	26.081
PUS7	-0.509468	3.14826	-8.44854	3.0709e-16	5.73498e-15	26.0198
NUP155	-0.563199	3.07847	-8.43867	3.30727e-16	6.15978e-15	25.9469
SORBS1	0.621156	2.35782	8.43115	3.49951e-16	6.50909e-15	25.8913
NDRG2	0.781531	3.33288	8.42393	3.69413e-16	6.84703e-15	25.8381
TSPAN7	1.16381	2.99121	8.41929	3.82486e-16	7.07624e-15	25.8039
LY86	0.831851	3.76878	8.4101	4.09761e-16	7.57074e-15	25.7362
KCNJ5	0.82429	1.88443	8.40635	4.21433e-16	7.76569e-15	25.7085
PTGER4	0.735598	2.77434	8.39796	4.48741e-16	8.21636e-15	25.6468
AADAC	1.30959	1.80096	8.39616	4.54853e-16	8.30422e-15	25.6335
FOSB	1.58179	3.77204	8.38628	4.89706e-16	8.92876e-15	25.5609
GAS2L3	-0.55121	1.69812	-8.38516	4.93835e-16	8.99221e-15	25.5526
FRZB	0.886658	3.64898	8.37383	5.37467e-16	9.73553e-15	25.4694
SPRY2	0.632607	3.82236	8.37068	5.50234e-16	9.95377e-15	25.4463
LTBP2	0.840505	5.14415	8.36601	5.6975e-16	1.02934e-14	25.4121
AGR3	1.81146	5.39483	8.35853	6.02459e-16	1.08279e-14	25.3572
STXBP1	0.754968	3.96604	8.35063	6.39017e-16	1.147e-14	25.2993
C1orf198	0.51069	5.08072	8.34323	6.75219e-16	1.21041e-14	25.2451
RPL39L	-1.02709	3.92426	-8.33501	7.17852e-16	1.28518e-14	25.1849
HPDL	-0.890688	1.1103	-8.33435	7.21335e-16	1.28975e-14	25.1801
CCL26	-0.835905	0.963172	-8.33371	7.24816e-16	1.2943e-14	25.1754
RAP1GAP	1.14073	4.25915	8.3297	7.46745e-16	1.33174e-14	25.1461
KLF2	0.815693	4.39406	8.31817	8.13582e-16	1.44536e-14	25.0618
USP54	0.543744	3.49132	8.31619	8.25662e-16	1.46494e-14	25.0473
CHRNA5	-0.886431	1.32805	-8.3155	8.2987e-16	1.47053e-14	25.0423
ATP8A1	0.842268	3.15329	8.30508	8.96674e-16	1.58283e-14	24.9662
TWIST1	-0.965656	1.41001	-8.29908	9.37451e-16	1.65271e-14	24.9225
PTHLH	-1.16255	1.70482	-8.29468	9.68541e-16	1.70318e-14	24.8904
C1orf21	0.730521	2.66874	8.29427	9.71485e-16	1.70619e-14	24.8875
RASSF2	0.643876	3.54026	8.28949	1.00653e-15	1.76327e-14	24.8526
AK1	0.74007	3.5792	8.27995	1.08024e-15	1.89002e-14	24.7831
TNFSF12	0.573614	4.78203	8.26353	1.21988e-15	2.13163e-14	24.6637
PDIA4	-0.583941	7.16907	-8.26098	1.24305e-15	2.16939e-14	24.6452
ABCA6	0.511683	1.3654	8.26011	1.25106e-15	2.18062e-14	24.6389
PODN	0.806028	4.04999	8.25856	1.26553e-15	2.19756e-14	24.6275
CD83	0.701119	4.28075	8.25565	1.29301e-15	2.24247e-14	24.6064
TUBB	-0.560334	7.32872	-8.2536	1.31273e-15	2.27097e-14	24.5916
GPX3	0.906448	6.03093	8.23334	1.52451e-15	2.63077e-14	24.4446
ANKRD29	1.01656	2.18006	8.22975	1.56542e-15	2.69132e-14	24.4185
PLA2G10	1.26629	2.91412	8.22924	1.57124e-15	2.69798e-14	24.4149
FMO5	1.19877	3.58178	8.22573	1.61249e-15	2.7653e-14	24.3894
FBXO32	-0.85273	3.76359	-8.21746	1.71377e-15	2.9246e-14	24.3296
SLC46A2	1.13524	2.00433	8.21678	1.72236e-15	2.93565e-14	24.3246
FRY	0.601634	2.49808	8.21117	1.79502e-15	3.04823e-14	24.284
CYFIP2	0.699638	3.04638	8.20596	1.86517e-15	3.16348e-14	24.2464
IVD	0.553613	4.02782	8.18873	2.11706e-15	3.57757e-14	24.1219
THSD1	0.53468	1.83769	8.18611	2.15812e-15	3.64251e-14	24.103
DLEC1	0.713331	1.24095	8.17573	2.32902e-15	3.92141e-14	24.0281
PDK4	1.081	3.58305	8.17373	2.36342e-15	3.96969e-14	24.0137
CNR1	0.725948	1.39803	8.17344	2.36844e-15	3.9733e-14	24.0116
RGL1	0.620626	4.00514	8.16374	2.54304e-15	4.26106e-14	23.9417
SPRY1	0.610412	4.35136	8.15805	2.65133e-15	4.43714e-14	23.9008
CX3CR1	0.827863	1.27553	8.14229	2.97543e-15	4.94371e-14	23.7875
SMS	-0.521858	5.29042	-8.13835	3.0625e-15	5.07621e-14	23.7591
B3GNT8	1.01281	4.13872	8.13212	3.20511e-15	5.29991e-14	23.7144
CD22	0.791764	1.93102	8.12916	3.27524e-15	5.39656e-14	23.6931
COCH	-1.09539	1.21842	-8.12749	3.3154e-15	5.44977e-14	23.6812
CORO2B	0.561343	1.16632	8.12673	3.33387e-15	5.47364e-14	23.6757
GPD1	0.836184	1.44767	8.12194	3.45259e-15	5.65515e-14	23.6413
NRGN	1.18486	4.38083	8.11787	3.55663e-15	5.80497e-14	23.6122
CD36	0.966879	2.48373	8.11131	3.73095e-15	6.08233e-14	23.5652
EPB41L4A	0.546734	1.87978	8.10741	3.83854e-15	6.24304e-14	23.5372
TMEM130	1.14813	2.61613	8.10093	4.02436e-15	6.52228e-14	23.4908
PSPH	-0.683488	3.35583	-8.09955	4.06486e-15	6.58023e-14	23.481
DUSP14	-0.511585	3.6382	-8.09905	4.07974e-15	6.59662e-14	23.4774
PBXIP1	0.591171	6.25375	8.0949	4.20478e-15	6.78295e-14	23.4477
EPAS1	0.654969	6.13903	8.08325	4.57689e-15	7.36607e-14	23.3644
FADS2	-0.928881	3.64721	-8.07924	4.71241e-15	7.56661e-14	23.3358
B3GNT5	-0.718712	3.2528	-8.07869	4.73136e-15	7.58825e-14	23.3318
GGH	-0.975318	3.03325	-8.07374	4.90491e-15	7.8575e-14	23.2964
LTA4H	0.570916	5.38568	8.06903	5.07553e-15	8.10936e-14	23.2628
CDO1	0.674655	1.22312	8.06892	5.07969e-15	8.10936e-14	23.262
AQP3	1.42943	7.13771	8.0654	5.2113e-15	8.3099e-14	23.2369
MYH11	1.06231	3.90093	8.06328	5.29196e-15	8.41914e-14	23.2218
HMCN1	0.721862	1.98957	8.06141	5.36435e-15	8.52451e-14	23.2085
RHEBL1	-0.540423	1.89967	-8.05396	5.6624e-15	8.96729e-14	23.1554
RNF183	-1.01095	1.19769	-8.05118	5.77753e-15	9.12876e-14	23.1356
AFF3	0.635048	0.990966	8.03308	6.58761e-15	1.03436e-13	23.0067
RBP5	0.598744	2.91258	8.033	6.59121e-15	1.03436e-13	23.0062
MR1	0.524471	3.54428	8.03015	6.72867e-15	1.05474e-13	22.9859
CD207	1.39238	2.38427	8.02581	6.94364e-15	1.08721e-13	22.955
ALOX15B	1.42752	4.69108	8.02447	7.01121e-15	1.09655e-13	22.9455
GKN2	1.55393	2.18182	8.02155	7.16058e-15	1.11865e-13	22.9248
GPC4	0.858747	5.0805	8.0188	7.30483e-15	1.1399e-13	22.9052
RAB37	0.761543	2.04305	8.01643	7.43072e-15	1.15694e-13	22.8884
NPNT	1.06618	4.23142	8.00827	7.88252e-15	1.22316e-13	22.8305
SULT1A1	0.691019	2.46848	8.00585	8.02141e-15	1.24054e-13	22.8133
C6	0.861334	1.09512	8.00501	8.0703e-15	1.24671e-13	22.8074
MAST4	0.597489	3.05789	8.00356	8.15514e-15	1.25842e-13	22.7971
IFT140	0.550299	3.05622	7.99136	8.9054e-15	1.36809e-13	22.7107
TMEM106C	-0.576109	4.75337	-7.98985	9.00288e-15	1.38154e-13	22.7
ALDH3B1	0.851038	4.55609	7.98957	9.02129e-15	1.38283e-13	22.698
MUC1	1.05299	7.72567	7.98808	9.11857e-15	1.39547e-13	22.6874
HSD17B11	0.639736	5.59901	7.98755	9.15373e-15	1.39849e-13	22.6837
OLFM1	0.849905	1.67916	7.98684	9.20054e-15	1.4041e-13	22.6786
HLA-DPA1	0.880483	7.14699	7.98483	9.33516e-15	1.42307e-13	22.6644
OMG	0.776391	1.17277	7.98061	9.62316e-15	1.46536e-13	22.6345
ATP1B2	0.508878	1.26811	7.97012	1.03784e-14	1.5769e-13	22.5604
CNIH2	-0.57928	1.32666	-7.96615	1.0679e-14	1.61726e-13	22.5323
CIITA	0.720625	3.25077	7.96339	1.08934e-14	1.64793e-13	22.5128
STOM	0.625189	6.48862	7.95748	1.13665e-14	1.71762e-13	22.4711
RILP	0.572416	3.62274	7.95423	1.16352e-14	1.7563e-13	22.4481
CENPQ	-0.513091	2.54935	-7.95346	1.16993e-14	1.76407e-13	22.4427
CEACAM8	0.601785	0.636929	7.95297	1.17412e-14	1.76845e-13	22.4392
SMAD6	0.548837	1.84925	7.94663	1.22886e-14	1.84689e-13	22.3945
HSPB8	0.859742	3.77446	7.94644	1.23047e-14	1.84731e-13	22.3932
MS4A7	0.801455	4.12968	7.94401	1.2522e-14	1.87587e-13	22.376
ATP13A3	-0.510717	3.94317	-7.94245	1.26627e-14	1.89489e-13	22.365
CHRNA9	-1.19943	0.399333	-7.9379	1.30833e-14	1.95362e-13	22.3329
GAL	-1.19459	0.612219	-7.93595	1.32678e-14	1.9769e-13	22.3192
ACOT7	-0.55162	3.43431	-7.93386	1.34675e-14	2.0045e-13	22.3045
ACSM3	0.748518	1.6759	7.92358	1.44978e-14	2.15323e-13	22.2322
CBX2	-0.841397	2.31895	-7.91543	1.53693e-14	2.27778e-13	22.1749
ALDH1B1	-0.538717	4.24437	-7.91437	1.5487e-14	2.29278e-13	22.1674
ACADSB	0.663383	3.26972	7.91312	1.56261e-14	2.31089e-13	22.1586
BANK1	0.71356	2.80458	7.90172	1.69544e-14	2.50466e-13	22.0785
GCNT4	0.577645	1.11168	7.89967	1.72041e-14	2.53613e-13	22.0641
COX4I2	0.746786	3.49206	7.88607	1.89609e-14	2.79215e-13	21.9687
NAV1	-0.570252	2.49339	-7.88086	1.96794e-14	2.89181e-13	21.9322
PI16	0.719698	0.711267	7.86104	2.26666e-14	3.3132e-13	21.7935
SOSTDC1	1.06719	0.984618	7.85587	2.35172e-14	3.42669e-13	21.7573
KCNJ15	1.14382	3.30162	7.85488	2.36825e-14	3.44715e-13	21.7504
GUCY1A2	0.511485	1.35715	7.85391	2.38476e-14	3.46753e-13	21.7436
SAC3D1	-0.516428	3.48765	-7.84028	2.62757e-14	3.80463e-13	21.6484
FADS1	-0.668484	3.27512	-7.83876	2.65612e-14	3.84194e-13	21.6378
POLR3G	-0.555636	1.26081	-7.83299	2.76737e-14	3.99869e-13	21.5976
PALMD	0.585491	1.90607	7.83052	2.81636e-14	4.06524e-13	21.5804
SH2D3C	0.548357	3.10472	7.82653	2.89725e-14	4.16897e-13	21.5526
HLA-E	0.553591	8.36262	7.82507	2.92734e-14	4.20354e-13	21.5424
CD37	0.735695	3.95884	7.82109	3.01133e-14	4.3152e-13	21.5147
RAC3	-0.859543	3.64535	-7.81386	3.16984e-14	4.53296e-13	21.4643
PER1	0.805714	4.47617	7.81079	3.23966e-14	4.62804e-13	21.4429
RASSF5	0.502355	3.6049	7.81051	3.24598e-14	4.63229e-13	21.441
ARHGEF15	0.571554	2.36559	7.81012	3.25487e-14	4.6402e-13	21.4383
CD34	0.590071	3.76503	7.79897	3.5225e-14	4.99603e-13	21.3608
ETV1	0.776664	2.72264	7.78664	3.84382e-14	5.43509e-13	21.2751
FCHO2	0.540055	4.10381	7.78331	3.93525e-14	5.55794e-13	21.2521
RRM2B	0.504802	3.9445	7.78319	3.93873e-14	5.55794e-13	21.2512
LDHA	-0.539158	6.67788	-7.77882	4.06221e-14	5.71473e-13	21.2209
TBX5	0.63274	2.51333	7.76847	4.37053e-14	6.14223e-13	21.1491
PPP1R12B	0.597845	2.83338	7.75953	4.6551e-14	6.52892e-13	21.0872
MAOA	1.00142	5.08872	7.74313	5.22557e-14	7.30683e-13	20.9738
HLA-DMB	0.778972	5.68883	7.74298	5.23122e-14	7.30736e-13	20.9728
RXRG	0.653061	0.704477	7.74217	5.261e-14	7.34156e-13	20.9672
ENO1	-0.563604	8.37994	-7.73739	5.4411e-14	7.57761e-13	20.9342
ALDOA	-0.519766	7.60931	-7.73655	5.47317e-14	7.61464e-13	20.9284
SLC27A3	0.571756	3.66271	7.72465	5.95112e-14	8.24646e-13	20.8463
LMO3	1.24792	4.21061	7.72447	5.9589e-14	8.249e-13	20.845
CHTF18	-0.61161	2.48561	-7.72283	6.02782e-14	8.32777e-13	20.8337
PLD4	0.571821	1.45164	7.71994	6.15156e-14	8.4818e-13	20.8138
PLA2G4E	0.764493	1.02976	7.71766	6.25067e-14	8.60135e-13	20.7981
TPPP	0.869692	2.57142	7.71583	6.33176e-14	8.70429e-13	20.7854
GPC6	-0.910408	2.28086	-7.71148	6.52797e-14	8.94738e-13	20.7555
AMY2B	0.719058	1.94829	7.70968	6.61106e-14	9.05078e-13	20.7431
HBB	1.39724	5.71563	7.70957	6.61647e-14	9.05078e-13	20.7423
CAMK2D	0.527678	4.02181	7.70149	7.00227e-14	9.53148e-13	20.6867
CDH5	0.621335	3.99411	7.69772	7.18974e-14	9.76747e-13	20.6608
SULF1	-1.06034	4.70453	-7.69138	7.5165e-14	1.02014e-12	20.6172
IFRD1	-0.5828	3.17461	-7.68932	7.62602e-14	1.03399e-12	20.603
LNX2	0.510855	3.76613	7.68306	7.96789e-14	1.07929e-12	20.56
HOXD1	1.11149	1.88644	7.68042	8.11634e-14	1.09725e-12	20.5419
SPN	0.671216	2.75839	7.67834	8.23538e-14	1.11226e-12	20.5276
HLTF	-0.535823	3.60358	-7.67177	8.62239e-14	1.16113e-12	20.4826
SLC16A5	0.767981	4.12823	7.64668	1.02743e-13	1.37423e-12	20.3106
ARNTL2	-0.956533	2.64756	-7.64598	1.03249e-13	1.37967e-12	20.3058
CTSE	1.87274	5.78601	7.632	1.13814e-13	1.51355e-12	20.2103
BCAM	0.823325	6.18263	7.62985	1.15529e-13	1.53342e-12	20.1956
RRAD	1.16121	4.65683	7.62521	1.19324e-13	1.58075e-12	20.1639
DYNLRB2	0.893588	1.18161	7.62234	1.21735e-13	1.60962e-12	20.1443
UTRN	0.520169	3.72413	7.62159	1.22369e-13	1.61646e-12	20.1392
CD1B	0.737722	0.818821	7.60605	1.36333e-13	1.78728e-12	20.0332
ANGPT2	-0.762702	2.73548	-7.6058	1.3657e-13	1.78871e-12	20.0315
MYCT1	0.542129	2.6885	7.60357	1.38701e-13	1.81491e-12	20.0164
FGFR4	0.880327	2.13802	7.60204	1.40185e-13	1.83086e-12	20.0059
ANGPTL1	0.553343	1.23637	7.59803	1.44139e-13	1.88073e-12	19.9787
EGR1	0.991643	6.2036	7.58673	1.55902e-13	2.02848e-12	19.9017
MEOX2	0.693031	1.99489	7.58283	1.60165e-13	2.082e-12	19.8753
LHFPL3	0.658461	0.773902	7.57823	1.65362e-13	2.14151e-12	19.844
PRR7	-0.642259	2.00566	-7.56967	1.75459e-13	2.26902e-12	19.7859
PAFAH1B3	-0.639456	4.95935	-7.56961	1.75535e-13	2.26902e-12	19.7854
ARHGEF6	0.533981	2.94	7.56233	1.84598e-13	2.38173e-12	19.7361
C1QL1	-0.659217	0.545938	-7.56131	1.85905e-13	2.39636e-12	19.7292
RHOJ	0.522411	2.63337	7.56007	1.87514e-13	2.41486e-12	19.7207
ITGB6	1.01632	5.38012	7.5577	1.90609e-13	2.45243e-12	19.7047
TDP1	-0.515125	2.21954	-7.55572	1.93239e-13	2.48396e-12	19.6912
SLC25A10	-0.609928	3.41593	-7.54765	2.04316e-13	2.61907e-12	19.6366
HMGA2	-1.14836	0.101442	-7.54379	2.09838e-13	2.68241e-12	19.6104
ZMAT1	0.694207	2.15657	7.53834	2.17876e-13	2.78002e-12	19.5736
AXIN2	0.699263	2.59981	7.53697	2.19953e-13	2.80137e-12	19.5643
PDCD2L	-0.510569	3.29448	-7.53519	2.22671e-13	2.83294e-12	19.5523
SPTLC3	0.784161	1.71347	7.51321	2.59079e-13	3.28458e-12	19.4038
TRIB3	-0.684136	3.61213	-7.50932	2.66102e-13	3.37054e-12	19.3776
LTBP4	0.698714	4.27387	7.50465	2.74788e-13	3.47105e-12	19.3461
FOXF2	0.737258	2.36827	7.50053	2.82677e-13	3.56096e-12	19.3184
LIPA	0.666132	5.39608	7.49665	2.90323e-13	3.65064e-12	19.2922
TXNIP	0.78329	7.41262	7.49586	2.91899e-13	3.66381e-12	19.2869
APCDD1L	-0.731775	0.541346	-7.49165	3.00475e-13	3.76803e-12	19.2585
LSAMP	0.557046	1.45598	7.48208	3.20861e-13	4.0064e-12	19.1942
FLI1	0.533479	2.53047	7.48091	3.23451e-13	4.02701e-12	19.1863
TSPAN3	0.505158	5.85058	7.47849	3.28873e-13	4.08717e-12	19.17
GPRC5A	0.902452	6.22472	7.4771	3.32015e-13	4.12252e-12	19.1607
PGK1	-0.521813	6.60256	-7.47499	3.36869e-13	4.17905e-12	19.1465
ANKFN1	0.502437	0.74567	7.47308	3.41293e-13	4.23014e-12	19.1337
KCNMB4	-1.01239	2.44085	-7.46617	3.57857e-13	4.42357e-12	19.0872
PIP5K1B	0.725567	1.80834	7.46333	3.64872e-13	4.50226e-12	19.0682
CLIC3	1.06612	4.08805	7.46262	3.66656e-13	4.51622e-12	19.0634
RASL12	0.57285	3.24372	7.45984	3.73705e-13	4.5908e-12	19.0448
ELOVL4	-0.72532	0.865175	-7.45044	3.98514e-13	4.88691e-12	18.9818
PAQR4	-0.565956	3.22704	-7.44978	4.00323e-13	4.90475e-12	18.9773
RGS22	0.524593	0.384988	7.44132	4.24151e-13	5.18752e-12	18.9207
IRX1	0.929504	1.07032	7.44086	4.25482e-13	5.19921e-12	18.9176
OSR1	0.595228	1.69795	7.43671	4.37714e-13	5.33482e-12	18.8899
AZU1	0.632188	0.65888	7.43671	4.37735e-13	5.33482e-12	18.8898
CD69	0.848732	2.61096	7.42759	4.65846e-13	5.65752e-12	18.8288
P2RY14	0.557019	2.14051	7.42522	4.73434e-13	5.74464e-12	18.813
CPT1C	-0.619839	1.2563	-7.423	4.80652e-13	5.81744e-12	18.7982
F12	-0.780377	1.91632	-7.41653	5.02312e-13	6.06847e-12	18.755
CCL23	0.772797	1.96606	7.39281	5.90311e-13	7.05775e-12	18.5968
SLC7A1	-0.511932	3.37645	-7.3849	6.22922e-13	7.43483e-12	18.5441
FJX1	-0.633034	1.93259	-7.38382	6.2751e-13	7.48314e-12	18.5369
SPAG4	-0.70753	3.47097	-7.38191	6.3571e-13	7.57441e-12	18.5242
ZFP36L2	0.563111	6.16759	7.37969	6.45333e-13	7.68246e-12	18.5095
ADAMTS5	-0.604856	1.39353	-7.36743	7.01335e-13	8.31343e-12	18.428
SLC6A4	0.742087	0.471673	7.36661	7.05223e-13	8.35237e-12	18.4226
FGFR2	0.795472	2.58997	7.35429	7.66596e-13	9.05602e-12	18.3408
CA9	-1.54751	2.42921	-7.35243	7.76314e-13	9.15522e-12	18.3285
PTPRB	0.640663	2.7659	7.35122	7.82726e-13	9.22299e-12	18.3204
CD74	0.809868	10.0498	7.35061	7.85964e-13	9.25328e-12	18.3164
SLC5A9	0.527447	0.817186	7.34853	7.97102e-13	9.36848e-12	18.3026
CSRP2	-0.608594	2.02794	-7.34618	8.09852e-13	9.48615e-12	18.2871
EDA2R	0.682182	1.36115	7.34339	8.2532e-13	9.65102e-12	18.2685
SERPIND1	1.32205	1.60993	7.342	8.33067e-13	9.7334e-12	18.2594
ACSS1	0.683065	3.41456	7.3411	8.38148e-13	9.78452e-12	18.2534
NEIL1	0.643297	2.64717	7.33373	8.80983e-13	1.02759e-11	18.2046
GREM1	-1.08413	2.70316	-7.3315	8.94337e-13	1.04229e-11	18.1899
MAP6	0.608009	1.88594	7.32933	9.07545e-13	1.05591e-11	18.1755
SCNN1B	1.09049	4.19846	7.32664	9.24196e-13	1.07438e-11	18.1577
HSPB6	0.825674	2.73472	7.322	9.53579e-13	1.10761e-11	18.1271
ADCY9	0.54761	2.9332	7.32065	9.62334e-13	1.11684e-11	18.1181
GYPC	0.553113	3.29292	7.31283	1.01439e-12	1.17529e-11	18.0665
STX1A	-0.744967	3.01581	-7.30219	1.08976e-12	1.26156e-11	17.9963
CABLES1	0.712593	2.95118	7.29568	1.13864e-12	1.31704e-11	17.9534
ICAM5	0.816388	2.0832	7.29514	1.14276e-12	1.3207e-11	17.9498
SPOCK2	0.767042	4.18372	7.29306	1.15883e-12	1.33816e-11	17.9361
CFTR	1.0819	2.22738	7.29007	1.18242e-12	1.36313e-11	17.9164
FOXA2	1.27973	3.70116	7.28756	1.20252e-12	1.384e-11	17.8999
FBP1	0.767519	6.13727	7.28715	1.2058e-12	1.38662e-11	17.8972
HLA-DRB5	0.991348	8.15552	7.28331	1.23734e-12	1.42171e-11	17.872
SOX7	0.614392	1.91069	7.28253	1.24385e-12	1.42683e-11	17.8668
CPM	0.976402	5.08396	7.27369	1.31994e-12	1.50911e-11	17.8087
ITLN2	0.882931	0.951626	7.27114	1.34274e-12	1.53264e-11	17.7919
SHOX2	-0.636708	0.558271	-7.27056	1.34798e-12	1.53737e-11	17.7881
HBA2	1.17564	3.08522	7.26935	1.35892e-12	1.5473e-11	17.7802
STEAP1	-1.05629	4.01681	-7.26552	1.39427e-12	1.58494e-11	17.755
EPDR1	0.88059	4.48615	7.26295	1.41858e-12	1.61042e-11	17.7381
MRPL12	-0.550431	4.83907	-7.2629	1.41901e-12	1.61042e-11	17.7378
BNIPL	1.01053	2.6104	7.25086	1.5382e-12	1.73857e-11	17.6589
CCL19	1.23044	5.55907	7.25039	1.54306e-12	1.74264e-11	17.6558
ACSL5	0.899162	5.77219	7.2363	1.69561e-12	1.9087e-11	17.5635
IGF2BP2	-0.930252	2.86002	-7.22534	1.82448e-12	2.04877e-11	17.4918
HSPB7	0.601928	1.54654	7.22519	1.82624e-12	2.04909e-11	17.4908
PITPNC1	-0.671196	3.03971	-7.21774	1.91945e-12	2.15019e-11	17.4421
HES6	-1.00916	3.36041	-7.21571	1.94552e-12	2.17587e-11	17.4289
CCR4	0.653879	1.85234	7.21448	1.96159e-12	2.19208e-11	17.4208
DISP1	0.519695	2.64896	7.20991	2.02236e-12	2.25091e-11	17.391
LMOD1	0.672101	3.17559	7.19879	2.17777e-12	2.41612e-11	17.3185
PLCD1	0.514898	2.9474	7.19321	2.26026e-12	2.50363e-11	17.2821
SLC16A11	0.673693	1.68701	7.19295	2.26419e-12	2.50598e-11	17.2804
SHROOM3	0.587768	3.69685	7.19131	2.28894e-12	2.53136e-11	17.2698
RGS5	0.707752	4.51098	7.181	2.45135e-12	2.70448e-11	17.2027
SLC25A21	-0.625862	0.496113	-7.17749	2.50916e-12	2.76606e-11	17.1798
TEPP	0.695061	1.0284	7.16302	2.76229e-12	3.02824e-11	17.0858
MYO5C	0.586797	3.51107	7.14477	3.11718e-12	3.40922e-11	16.9675
GJB1	1.43547	2.71963	7.14398	3.13369e-12	3.42457e-11	16.9623
ARC	0.51056	0.739373	7.1437	3.13945e-12	3.42816e-11	16.9605
TUB	0.516159	1.32319	7.13307	3.36814e-12	3.66345e-11	16.8917
TNFAIP6	-0.77167	2.79203	-7.13274	3.37546e-12	3.66853e-11	16.8896
CD1A	1.17482	2.03974	7.13175	3.39773e-12	3.68983e-11	16.8832
ARRDC3	0.623727	5.47815	7.1256	3.53844e-12	3.83363e-11	16.8435
P2RY12	0.581601	1.36987	7.11671	3.75244e-12	4.05598e-11	16.786
ROBO4	0.586193	3.00593	7.11649	3.75786e-12	4.05866e-11	16.7846
CYP4X1	0.98725	3.20077	7.11051	3.90916e-12	4.21551e-11	16.746
ABCC3	0.980092	5.23522	7.10925	3.94176e-12	4.24075e-11	16.7379
TLR3	0.657223	2.4682	7.10876	3.95454e-12	4.25121e-11	16.7347
IL16	0.508713	2.24935	7.10414	4.07677e-12	4.37243e-11	16.7049
SCML2	-0.525357	0.67607	-7.09965	4.19904e-12	4.49314e-11	16.676
MLLT11	-0.851842	2.20371	-7.09323	4.38035e-12	4.67631e-11	16.6346
BCHE	0.671978	0.752291	7.09047	4.46069e-12	4.74745e-11	16.6169
HOXD10	-0.586935	0.50279	-7.08722	4.55708e-12	4.84632e-11	16.5959
SLC2A5	-0.646032	1.87564	-7.06987	5.10751e-12	5.41091e-11	16.4844
FKBP4	-0.5155	4.72649	-7.05919	5.47805e-12	5.78137e-11	16.4159
MPZL2	0.763447	5.54696	7.05763	5.53461e-12	5.83662e-11	16.4058
AGMAT	-0.570059	1.46961	-7.0569	5.56102e-12	5.85555e-11	16.4012
TCEA3	0.842751	4.77312	7.05575	5.60324e-12	5.89552e-11	16.3938
PHGDH	-0.961203	2.39199	-7.05351	5.68595e-12	5.97801e-11	16.3795
FKBP10	-0.854832	5.02999	-7.05292	5.70819e-12	5.99685e-11	16.3756
RAPGEF5	0.540277	3.37226	7.0514	5.76524e-12	6.04303e-11	16.3659
FRMD5	-0.672377	1.47082	-7.04579	5.98108e-12	6.25508e-11	16.33
PLEKHH2	0.578994	2.21973	7.04501	6.01162e-12	6.28228e-11	16.325
SIAE	0.597633	3.58071	7.04111	6.16684e-12	6.43478e-11	16.3
CAMK2N2	-0.667598	1.2367	-7.03935	6.23839e-12	6.50454e-11	16.2888
CD300LF	0.69757	3.14687	7.03613	6.37121e-12	6.62309e-11	16.2682
SOD3	0.79582	4.78857	7.0264	6.78946e-12	7.04731e-11	16.206
PPIL6	0.631692	1.67951	7.01935	7.10937e-12	7.36282e-11	16.1609
DHRS3	0.650605	5.46732	7.01586	7.27342e-12	7.52148e-11	16.1386
SLC39A14	-0.561136	3.45536	-7.01056	7.52911e-12	7.76271e-11	16.1049
HLA-DOB	0.688336	3.11817	7.00931	7.59097e-12	7.82068e-11	16.0969
GIMAP8	0.610282	3.41959	7.00104	8.01086e-12	8.23491e-11	16.0442
HS3ST2	0.889022	2.56972	7.00046	8.04161e-12	8.26039e-11	16.0405
SATB1	0.516609	2.24708	6.9992	8.10759e-12	8.30968e-11	16.0325
ITPR1	0.581623	2.63007	6.99672	8.23985e-12	8.42333e-11	16.0166
DNASE2B	0.5453	0.886768	6.99666	8.24279e-12	8.42333e-11	16.0163
NME5	0.701633	1.92927	6.99047	8.58165e-12	8.75025e-11	15.9769
PLSCR4	0.543554	3.5687	6.98443	8.92595e-12	9.08127e-11	15.9384
IRF8	0.675482	3.53915	6.9789	9.25237e-12	9.39268e-11	15.9033
NR4A1	0.947949	4.28061	6.97457	9.51628e-12	9.64646e-11	15.8758
AVPI1	0.617678	4.42455	6.97047	9.77281e-12	9.89203e-11	15.8498
ANK3	0.562879	2.05705	6.96871	9.88549e-12	9.99878e-11	15.8386
KCNQ1	0.872227	4.01272	6.96291	1.02647e-11	1.03596e-10	15.8018
SLC16A7	0.688813	1.9371	6.94874	1.12521e-11	1.12904e-10	15.712
MFNG	0.500422	3.41839	6.94067	1.1855e-11	1.18781e-10	15.661
KIAA1324L	0.643904	2.29269	6.93156	1.25743e-11	1.25354e-10	15.6034
LGALS2	0.835669	2.73523	6.91805	1.3721e-11	1.36491e-10	15.5181
GAS6	0.673607	4.61536	6.91047	1.44086e-11	1.43125e-10	15.4703
REPS2	0.534722	2.06444	6.90949	1.45001e-11	1.43849e-10	15.4641
MLPH	0.85917	4.90663	6.90947	1.45022e-11	1.43849e-10	15.464
ELOVL6	-0.797463	1.87889	-6.90807	1.46336e-11	1.44945e-10	15.4552
CES1	1.27756	4.57612	6.90439	1.49842e-11	1.48311e-10	15.432
ARHGDIB	0.562524	6.82015	6.88984	1.64556e-11	1.6218e-10	15.3405
MYBPHL	1.07173	1.72601	6.88005	1.75254e-11	1.71625e-10	15.2789
GLB1L3	1.10486	1.46399	6.87817	1.77383e-11	1.73464e-10	15.2671
PMAIP1	-0.847208	3.26187	-6.8743	1.81842e-11	1.7745e-10	15.2429
RNF144B	0.556585	3.67965	6.86787	1.89504e-11	1.84537e-10	15.2025
SMOX	-0.637121	2.91638	-6.86665	1.90997e-11	1.8566e-10	15.1949
ACADS	0.501744	4.09575	6.85973	1.99666e-11	1.93887e-10	15.1515
LRFN4	-0.718138	3.13191	-6.85537	2.05322e-11	1.99101e-10	15.1242
PYCR1	-0.627189	5.45844	-6.8508	2.11414e-11	2.04579e-10	15.0956
TDRD10	0.879534	2.2348	6.84496	2.19476e-11	2.11788e-10	15.0591
SLC47A1	0.79868	2.02388	6.84397	2.2086e-11	2.12976e-10	15.0529
TMEM65	-0.523646	2.97904	-6.8427	2.22666e-11	2.14568e-10	15.045
UCN3	1.20423	1.58262	6.84019	2.26271e-11	2.17437e-10	15.0293
KCNK5	0.796907	4.44334	6.83552	2.33129e-11	2.23562e-10	15.0001
SESN3	0.625467	3.38978	6.83526	2.33515e-11	2.23777e-10	14.9985
GPC3	1.00981	3.07017	6.83147	2.39243e-11	2.29108e-10	14.9748
ADAMTSL2	0.618047	3.21068	6.82927	2.42633e-11	2.32194e-10	14.9611
PRELP	0.801401	4.48274	6.8179	2.609e-11	2.49011e-10	14.8902
B4GALNT4	-1.09385	1.88357	-6.81525	2.65334e-11	2.53045e-10	14.8737
SBSN	-0.751042	0.552371	-6.81422	2.67084e-11	2.54538e-10	14.8673
PNCK	-0.531774	0.529493	-6.81172	2.71375e-11	2.57918e-10	14.8517
ENPP4	0.500283	4.19283	6.79963	2.93106e-11	2.77429e-10	14.7765
CPD	-0.693464	5.04911	-6.79935	2.93632e-11	2.77738e-10	14.7747
CYSLTR1	0.555831	1.74862	6.7985	2.95225e-11	2.79054e-10	14.7694
TMEM145	-0.564354	0.602455	-6.7967	2.98625e-11	2.82075e-10	14.7582
TMEM38B	-0.514432	2.18193	-6.79031	3.11006e-11	2.9337e-10	14.7186
PTPRT	0.512206	0.554942	6.78273	3.26357e-11	3.06806e-10	14.6715
GAS2L2	0.714089	1.13591	6.78025	3.31553e-11	3.1148e-10	14.6561
C20orf85	1.54852	2.6933	6.77574	3.41172e-11	3.20083e-10	14.6281
RAMP2	0.586749	4.09278	6.77012	3.53555e-11	3.30804e-10	14.5933
COL12A1	-1.03133	3.468	-6.7656	3.63853e-11	3.4021e-10	14.5653
HMGB3	-0.936213	6.07237	-6.76473	3.65858e-11	3.41854e-10	14.5599
ANKRD13B	-0.532417	1.99267	-6.76455	3.66282e-11	3.4202e-10	14.5588
PLCXD3	0.544317	0.759557	6.76347	3.68803e-11	3.44142e-10	14.5521
CLDN5	0.721463	4.12016	6.76311	3.69628e-11	3.44679e-10	14.5499
MMD	-0.606885	3.68852	-6.76062	3.75509e-11	3.49928e-10	14.5345
TUBB2B	-1.28639	1.78956	-6.76041	3.76009e-11	3.50158e-10	14.5332
CHAC2	-0.527435	2.19514	-6.75876	3.79961e-11	3.53601e-10	14.523
MEX3A	-0.866514	2.77854	-6.75183	3.97001e-11	3.68404e-10	14.4801
CACNB1	0.592441	2.51613	6.75176	3.97197e-11	3.68404e-10	14.4797
FOLR2	0.795499	4.45543	6.74873	4.04884e-11	3.74532e-10	14.4609
C1orf87	0.600488	0.685673	6.7477	4.07525e-11	3.76723e-10	14.4546
SEMA4A	0.518699	3.72288	6.74697	4.09403e-11	3.78206e-10	14.4501
RCAN1	0.506297	3.19156	6.74553	4.13172e-11	3.81004e-10	14.4411
GAS7	0.530677	2.69089	6.74549	4.13256e-11	3.81004e-10	14.4409
GIMAP7	0.63116	4.53155	6.74227	4.21753e-11	3.88321e-10	14.4211
GRASP	0.584354	3.0097	6.74161	4.23528e-11	3.89696e-10	14.417
MEGF9	0.595465	4.22762	6.72173	4.80191e-11	4.38919e-10	14.2944
C16orf54	0.583554	2.45224	6.71957	4.86773e-11	4.44641e-10	14.2811
PDE4C	0.600021	1.48305	6.71589	4.98187e-11	4.54468e-10	14.2585
SH3PXD2B	-0.531051	3.94595	-6.70434	5.35785e-11	4.86844e-10	14.1874
TSKU	-0.635782	4.48981	-6.70241	5.42346e-11	4.92483e-10	14.1755
C1orf162	0.584619	4.09724	6.70157	5.45197e-11	4.94748e-10	14.1704
SUSD4	0.822124	2.47212	6.701	5.47173e-11	4.96216e-10	14.1669
CNTD2	-0.853012	1.8431	-6.69999	5.5066e-11	4.98725e-10	14.1607
GIMAP1	0.504342	2.57394	6.69433	5.70596e-11	5.14762e-10	14.126
HLA-DQA1	0.827389	5.7001	6.69209	5.78688e-11	5.21044e-10	14.1122
DDAH1	0.566586	4.86595	6.68588	6.01733e-11	5.4004e-10	14.0741
IL17RD	-0.501616	1.19128	-6.68359	6.10461e-11	5.47164e-10	14.06
RNF145	0.590252	5.81914	6.68221	6.15753e-11	5.5155e-10	14.0516
ADAMTS1	0.71153	2.93744	6.67601	6.40166e-11	5.73048e-10	14.0137
MEGF11	0.616663	0.588703	6.67532	6.42964e-11	5.74994e-10	14.0094
DBN1	-0.520203	4.81038	-6.6719	6.56894e-11	5.86885e-10	13.9885
HGF	0.563333	1.64982	6.67101	6.60585e-11	5.89802e-10	13.983
NINJ2	0.671622	3.68164	6.66943	6.67165e-11	5.95293e-10	13.9733
UNC13B	0.666116	4.77979	6.66696	6.77571e-11	6.03801e-10	13.9582
SGMS2	0.590201	4.0224	6.6633	6.93259e-11	6.16591e-10	13.9359
RCSD1	0.552726	2.7151	6.66207	6.98649e-11	6.20986e-10	13.9283
THRB	0.504383	1.57265	6.65765	7.18238e-11	6.36764e-10	13.9013
NXF3	0.555996	0.429299	6.65316	7.38726e-11	6.54509e-10	13.8739
HLA-DRA	0.773446	10.278	6.65124	7.47656e-11	6.61576e-10	13.8622
FOLH1	-0.549353	1.48438	-6.64657	7.69774e-11	6.80278e-10	13.8337
KCNK3	0.813107	1.96549	6.63614	8.21623e-11	7.24713e-10	13.7701
MARCKSL1	-0.577831	6.90052	-6.63534	8.25711e-11	7.27854e-10	13.7653
CELSR3	-0.639617	1.52584	-6.62282	8.92782e-11	7.83985e-10	13.6891
SEMA3A	-0.905992	1.75578	-6.61064	9.63153e-11	8.42577e-10	13.615
PMP22	0.561756	5.08585	6.60155	1.01918e-10	8.88782e-10	13.5599
PGM2L1	-0.552658	3.38963	-6.60144	1.01989e-10	8.88846e-10	13.5592
SPRY4	0.585061	3.94625	6.59631	1.05295e-10	9.15352e-10	13.5281
ENPP1	-0.566828	0.796623	-6.58244	1.14764e-10	9.92686e-10	13.444
CD59	0.510329	6.42492	6.57133	1.22946e-10	1.06147e-09	13.3769
BDKRB1	-0.58675	0.838393	-6.57057	1.23525e-10	1.06581e-09	13.3723
KLRB1	0.672987	3.23534	6.56811	1.25422e-10	1.08083e-09	13.3574
MALL	0.791045	4.0524	6.56611	1.26985e-10	1.09294e-09	13.3453
THBD	0.665984	4.14784	6.56254	1.29822e-10	1.11528e-09	13.3238
UPK3B	0.969914	2.09595	6.56214	1.3014e-10	1.11731e-09	13.3214
TMEM119	0.634866	3.90422	6.55329	1.37461e-10	1.17653e-09	13.268
ITPR2	0.502916	2.65277	6.54817	1.41883e-10	1.21213e-09	13.2371
ESM1	-0.795955	3.01078	-6.53579	1.53148e-10	1.30274e-09	13.1626
DLX3	0.745363	1.73809	6.53505	1.5385e-10	1.30791e-09	13.1582
C1QTNF6	-0.572229	2.982	-6.52976	1.58948e-10	1.34877e-09	13.1264
CNGA4	0.509416	0.740786	6.52312	1.65588e-10	1.40082e-09	13.0865
DAAM2	0.705912	2.62743	6.51783	1.71068e-10	1.4463e-09	13.0547
PRKCQ	0.552287	1.74935	6.51662	1.72341e-10	1.45507e-09	13.0475
ENPP5	0.65713	3.66038	6.51655	1.72421e-10	1.45507e-09	13.047
PLAC8	0.930525	2.51303	6.51107	1.7833e-10	1.50403e-09	13.0142
CST3	0.529063	6.66753	6.50868	1.80964e-10	1.52439e-09	12.9999
FOXD1	-0.713529	0.270353	-6.50771	1.82044e-10	1.53162e-09	12.9941
LIMS2	0.511426	2.43396	6.50688	1.82981e-10	1.53857e-09	12.9891
APOH	1.20219	1.13993	6.49986	1.91046e-10	1.60056e-09	12.947
FCER2	0.51188	0.757553	6.49813	1.93076e-10	1.61561e-09	12.9367
CCL7	-0.803689	1.62146	-6.49648	1.95049e-10	1.63015e-09	12.9268
CHAC1	-0.542096	2.38772	-6.49426	1.97726e-10	1.65053e-09	12.9135
LIMCH1	0.643447	4.4262	6.49267	1.99662e-10	1.6657e-09	12.904
CFI	0.716569	4.63232	6.49194	2.00558e-10	1.67127e-09	12.8996
AHNAK	0.701949	5.13743	6.4909	2.0184e-10	1.68083e-09	12.8934
BOK	0.564102	4.74435	6.49051	2.02321e-10	1.68382e-09	12.8911
TP53INP1	0.526514	4.75269	6.48906	2.04137e-10	1.69689e-09	12.8824
IGSF10	0.577351	0.520406	6.48895	2.04274e-10	1.69702e-09	12.8817
GMPR	0.617429	2.78704	6.47987	2.15958e-10	1.78658e-09	12.8275
MVP	0.511311	6.41366	6.47776	2.18768e-10	1.80767e-09	12.8149
LMO7	0.559657	4.70714	6.44996	2.59291e-10	2.13108e-09	12.6492
CAV1	0.888785	4.63105	6.44533	2.66718e-10	2.18693e-09	12.6217
FAM83A	-1.1045	4.15106	-6.44089	2.74031e-10	2.24424e-09	12.5953
TNFSF4	-0.501741	1.65813	-6.43735	2.80011e-10	2.29051e-09	12.5743
LTF	1.40692	4.42056	6.43223	2.88868e-10	2.35739e-09	12.544
VWA3A	0.618408	0.821754	6.43193	2.89405e-10	2.36038e-09	12.5421
MPEG1	0.625549	4.40723	6.4232	3.05203e-10	2.48776e-09	12.4903
CLDN23	0.570746	3.97906	6.42122	3.08887e-10	2.51632e-09	12.4787
ADAMTS12	-0.632601	2.39877	-6.41794	3.15112e-10	2.5595e-09	12.4592
PLEK2	-0.690677	4.0221	-6.41104	3.28609e-10	2.66289e-09	12.4183
BTK	0.531887	2.58756	6.41057	3.29537e-10	2.66884e-09	12.4156
ARRDC4	0.541357	3.21991	6.4104	3.29873e-10	2.67001e-09	12.4146
RAB17	0.594171	3.70899	6.40913	3.32425e-10	2.68752e-09	12.4071
KCNK17	0.6976	1.69353	6.39921	3.53061e-10	2.8444e-09	12.3484
SPINK5	1.15468	2.50373	6.39266	3.67361e-10	2.95445e-09	12.3097
CDC42BPA	0.561179	3.53742	6.38632	3.81735e-10	3.06117e-09	12.2723
ARHGAP30	0.527036	3.95344	6.37891	3.99229e-10	3.1867e-09	12.2287
IGFBP4	0.530363	7.58204	6.37602	4.06283e-10	3.23556e-09	12.2116
BEX4	0.622447	4.63217	6.37401	4.11245e-10	3.26756e-09	12.1998
SCARA3	0.683804	2.89543	6.37018	4.20862e-10	3.34014e-09	12.1773
CASC1	0.589115	1.34441	6.36937	4.22938e-10	3.3547e-09	12.1725
SLC4A4	0.79456	2.81803	6.36854	4.25048e-10	3.3695e-09	12.1676
SLC16A3	-0.637683	4.68718	-6.36755	4.27616e-10	3.38792e-09	12.1617
ZMYND12	0.506283	2.08082	6.35894	4.50426e-10	3.5666e-09	12.1111
C9orf24	1.04101	1.9728	6.35589	4.58786e-10	3.63072e-09	12.0932
CRYM	1.13785	2.94146	6.35315	4.66433e-10	3.68493e-09	12.0771
ABO	0.803888	3.06453	6.34904	4.78102e-10	3.77067e-09	12.053
HOXC8	-0.630041	0.729747	-6.34769	4.82031e-10	3.7981e-09	12.0451
B4GALT6	-0.516972	1.24088	-6.3411	5.01517e-10	3.93746e-09	12.0065
LDHD	0.737041	2.90073	6.33506	5.20092e-10	4.07171e-09	11.971
ARTN	-0.593563	1.42142	-6.33429	5.22514e-10	4.08836e-09	11.9665
DLL3	-0.909958	0.890005	-6.33273	5.27415e-10	4.12437e-09	11.9574
GADD45B	0.593932	5.37364	6.32822	5.41919e-10	4.22825e-09	11.931
MT1G	-0.916131	2.68557	-6.32733	5.44839e-10	4.24864e-09	11.9258
SCG5	-0.945469	2.60366	-6.32537	5.51294e-10	4.29173e-09	11.9143
PRKAA2	-0.59217	1.62651	-6.3249	5.52833e-10	4.30129e-09	11.9116
CLEC10A	0.677419	2.878	6.32115	5.6542e-10	4.39429e-09	11.8897
TCEAL2	0.580429	0.893825	6.31921	5.72062e-10	4.44094e-09	11.8783
TEKT1	0.81745	1.16154	6.31208	5.97063e-10	4.62724e-09	11.8366
DAB2	0.527782	3.90397	6.30901	6.08144e-10	4.70327e-09	11.8187
PLAC1	-0.588432	0.636263	-6.30739	6.14086e-10	4.7459e-09	11.8093
NR4A3	0.73301	2.06341	6.30423	6.25827e-10	4.82856e-09	11.7908
LIPH	0.874109	4.75877	6.29062	6.78904e-10	5.19326e-09	11.7115
STEAP3	0.595853	4.64133	6.29058	6.79093e-10	5.19326e-09	11.7113
KCNA3	0.607403	1.89966	6.28615	6.97295e-10	5.32072e-09	11.6855
EPHB2	-0.67596	2.53591	-6.27656	7.38412e-10	5.6159e-09	11.6297
FAM81B	0.834824	1.94278	6.27437	7.48147e-10	5.67437e-09	11.617
HPGD	1.19916	4.29664	6.2721	7.58326e-10	5.74214e-09	11.6038
SLC7A11	-0.752777	2.31484	-6.26701	7.81679e-10	5.91574e-09	11.5743
ELOVL7	-0.571821	2.39551	-6.26439	7.94002e-10	5.99917e-09	11.5591
HOXC6	-0.631411	1.13251	-6.26209	8.04957e-10	6.07201e-09	11.5457
DCN	0.706646	5.54184	6.24862	8.72182e-10	6.56482e-09	11.4677
YBX2	-0.808271	1.2753	-6.24386	8.97176e-10	6.73465e-09	11.4402
CH25H	0.933425	3.5286	6.24256	9.04146e-10	6.7833e-09	11.4326
FOXQ1	1.14065	3.73645	6.23195	9.62981e-10	7.18835e-09	11.3713
MBIP	0.63932	5.01877	6.22899	9.8004e-10	7.29738e-09	11.3542
PRSS12	0.885013	1.87565	6.22843	9.83277e-10	7.31754e-09	11.351
NTNG2	-0.582179	1.0627	-6.22603	9.97402e-10	7.41072e-09	11.3371
PACSIN1	-0.502307	0.835781	-6.22556	1.00015e-09	7.42715e-09	11.3344
TMC4	0.560509	5.66116	6.22353	1.01224e-09	7.50487e-09	11.3227
CADM3	0.543166	1.303	6.2173	1.05032e-09	7.7706e-09	11.2868
PLXNA2	0.624948	3.46	6.21396	1.0713e-09	7.91735e-09	11.2675
QPCT	-1.08205	3.44375	-6.21291	1.07797e-09	7.95812e-09	11.2615
CABYR	-0.935385	2.2514	-6.20553	1.12611e-09	8.29147e-09	11.219
DIO2	-0.70428	1.8879	-6.2044	1.13367e-09	8.34266e-09	11.2125
ADRB1	0.69244	1.55817	6.20239	1.14719e-09	8.43769e-09	11.2009
ZYG11A	-0.677972	0.688332	-6.20034	1.16116e-09	8.53594e-09	11.1891
IL17C	-0.574617	0.720426	-6.19457	1.20148e-09	8.81825e-09	11.1559
GLCCI1	0.567745	3.03501	6.19405	1.20519e-09	8.84081e-09	11.1529
STRA6	-0.869297	1.90161	-6.19301	1.21261e-09	8.89058e-09	11.147
SLC25A27	0.528015	1.60455	6.19239	1.217e-09	8.91802e-09	11.1434
COL7A1	-0.842185	1.86113	-6.19164	1.22244e-09	8.95312e-09	11.1391
CYP39A1	0.586381	1.81296	6.19013	1.23338e-09	9.02702e-09	11.1304
FILIP1	0.65585	2.22653	6.18335	1.28369e-09	9.36216e-09	11.0915
CCR7	0.696655	3.21802	6.17915	1.31585e-09	9.5715e-09	11.0675
TST	0.573516	5.0314	6.16866	1.39977e-09	1.01606e-08	11.0073
MAL	0.747701	2.09238	6.16566	1.42467e-09	1.03305e-08	10.9902
CLGN	-0.854209	1.1499	-6.15626	1.50561e-09	1.08889e-08	10.9364
SPIB	0.645064	1.59216	6.15533	1.51386e-09	1.09372e-08	10.9311
SYT1	-0.776696	1.3675	-6.15415	1.52436e-09	1.10016e-08	10.9244
TPSD1	0.779939	1.57028	6.14787	1.58166e-09	1.13973e-08	10.8885
IL17RE	0.597397	3.3192	6.1474	1.58604e-09	1.1423e-08	10.8858
SPON1	0.732479	4.18986	6.14479	1.61047e-09	1.15928e-08	10.8709
IL11	-0.571829	0.960716	-6.14432	1.61493e-09	1.16189e-08	10.8682
IKZF1	0.506058	2.20673	6.13947	1.66157e-09	1.19174e-08	10.8405
NR4A2	0.787683	3.65533	6.13841	1.67194e-09	1.19794e-08	10.8345
ZNF750	0.87106	2.60876	6.13775	1.67835e-09	1.20191e-08	10.8308
GLDC	-0.729076	0.855176	-6.13549	1.70077e-09	1.2167e-08	10.8179
NDN	0.584629	3.644	6.12812	1.77581e-09	1.26777e-08	10.7759
VEGFA	-0.605406	4.90228	-6.1276	1.78123e-09	1.27098e-08	10.7729
SLC16A1	-0.78917	2.23453	-6.12483	1.8103e-09	1.2904e-08	10.7572
PLCH1	0.55102	2.91044	6.12319	1.82776e-09	1.30217e-08	10.7478
NEDD4L	0.52187	3.43954	6.12144	1.84655e-09	1.3143e-08	10.7379
MSI1	-0.792903	1.27121	-6.1214	1.84699e-09	1.3143e-08	10.7377
DTX4	0.563922	4.31161	6.11926	1.87029e-09	1.32838e-08	10.7255
GPRC5C	0.749415	4.06387	6.11319	1.93781e-09	1.37351e-08	10.691
CCL17	0.969199	2.95995	6.1059	2.02205e-09	1.42953e-08	10.6496
CLDN2	1.40761	2.62784	6.10582	2.02303e-09	1.42953e-08	10.6491
EPHX1	0.766273	7.061	6.10301	2.05643e-09	1.45165e-08	10.6332
SRPX	0.657078	2.4269	6.09987	2.09447e-09	1.47775e-08	10.6154
CD48	0.681512	3.68991	6.09851	2.11109e-09	1.48797e-08	10.6077
FHOD3	-0.691685	1.27786	-6.09317	2.17782e-09	1.53188e-08	10.5775
GPR37	-0.814681	1.93525	-6.09023	2.21546e-09	1.55677e-08	10.5608
OCLN	0.569656	3.38704	6.08701	2.25746e-09	1.58549e-08	10.5425
ACP5	0.547082	6.10296	6.08643	2.26511e-09	1.58925e-08	10.5392
MB	-0.917346	2.40043	-6.08314	2.3089e-09	1.61588e-08	10.5206
ZNF704	0.558468	2.53581	6.08155	2.33033e-09	1.63006e-08	10.5116
MYH10	0.508418	3.99865	6.07815	2.37683e-09	1.6609e-08	10.4924
S100B	0.862712	2.73628	6.07448	2.42804e-09	1.69498e-08	10.4717
FGFR3	0.967391	2.99017	6.0713	2.47335e-09	1.72314e-08	10.4537
CD55	0.719339	6.53557	6.07	2.49208e-09	1.73531e-08	10.4464
DNAH9	0.569343	0.645381	6.06473	2.56962e-09	1.78572e-08	10.4166
FAM3C	-0.512618	4.68411	-6.05601	2.70291e-09	1.87251e-08	10.3675
RGS17	-0.69266	1.49522	-6.04873	2.81939e-09	1.94855e-08	10.3265
PLCB1	-0.520748	1.65094	-6.04786	2.83357e-09	1.95639e-08	10.3216
VGF	-0.752862	0.726541	-6.04684	2.85039e-09	1.96702e-08	10.3158
SLC29A4	-0.823024	2.68764	-6.04397	2.89816e-09	1.99899e-08	10.2997
USP44	0.520046	1.15921	6.03893	2.98393e-09	2.05278e-08	10.2713
EVI2B	0.564079	4.26668	6.03298	3.08838e-09	2.11965e-08	10.2379
SOX13	0.500299	2.99901	6.00275	3.67666e-09	2.4962e-08	10.0685
PER3	0.522049	2.53223	6.00104	3.71286e-09	2.51954e-08	10.059
PRAME	-1.33326	1.21909	-5.99512	3.84144e-09	2.6017e-08	10.0259
BAAT	0.818342	0.936529	5.99376	3.87177e-09	2.62096e-08	10.0182
UCHL1	-1.31438	3.95005	-5.99122	3.9287e-09	2.65173e-08	10.0041
GMFG	0.517328	4.52889	5.98168	4.14975e-09	2.79412e-08	9.95089
MS4A1	0.916622	2.26956	5.97812	4.23539e-09	2.84902e-08	9.93105
TOX	0.611243	2.3768	5.96696	4.51534e-09	3.02412e-08	9.86888
GPR160	0.624422	3.69802	5.96657	4.52538e-09	3.02938e-08	9.86672
FOSL1	-0.885627	2.70205	-5.96327	4.61163e-09	3.08265e-08	9.84839
HOXA1	-0.576597	0.935883	-5.9562	4.80211e-09	3.20071e-08	9.80908
PAPSS2	0.582519	4.95302	5.95449	4.8492e-09	3.22977e-08	9.7996
MMP11	-1.08357	4.21873	-5.95445	4.85037e-09	3.22977e-08	9.79937
CDH2	-0.79204	0.823578	-5.95287	4.89445e-09	3.25756e-08	9.79058
EPS8	0.549679	4.82503	5.95005	4.97393e-09	3.30728e-08	9.77494
ADAMTS4	-0.657228	2.34048	-5.94983	4.98027e-09	3.30832e-08	9.7737
MTUS1	0.573959	4.61668	5.94717	5.05653e-09	3.35095e-08	9.75894
SMARCD3	0.501645	3.30229	5.93521	5.41348e-09	3.57383e-08	9.6927
SPAG6	0.877421	1.64426	5.93243	5.5e-09	3.62576e-08	9.67731
RSPH1	0.819377	2.44722	5.92902	5.60788e-09	3.69337e-08	9.65845
GIMAP6	0.51261	3.78038	5.92709	5.67002e-09	3.72984e-08	9.64775
HOXD9	-0.630367	1.30307	-5.92608	5.70262e-09	3.74863e-08	9.64218
FSCN1	-0.734824	4.80277	-5.92377	5.77828e-09	3.79657e-08	9.62938
EMB	0.622608	4.48152	5.91575	6.048e-09	3.95877e-08	9.58509
FAM20A	0.647075	4.34752	5.91296	6.14474e-09	4.01829e-08	9.56968
CEACAM4	0.549429	1.69162	5.91174	6.18742e-09	4.04239e-08	9.56296
CD93	0.599498	4.92439	5.9042	6.45822e-09	4.20939e-08	9.52138
ATP11A	0.650242	4.95951	5.90105	6.57474e-09	4.27528e-08	9.50402
OLR1	0.768649	3.99461	5.89971	6.62507e-09	4.30195e-08	9.49662
CHIT1	1.11592	3.55914	5.89302	6.88121e-09	4.46618e-08	9.45979
BMP3	0.895773	2.65032	5.88909	7.0363e-09	4.55617e-08	9.43816
COL1A1	-0.91054	8.34196	-5.88672	7.13121e-09	4.61332e-08	9.42516
IGFBP7	0.502945	7.13071	5.88255	7.30158e-09	4.70661e-08	9.40224
EFCAB1	0.715318	1.23438	5.87917	7.44253e-09	4.79457e-08	9.38368
SLCO2B1	0.624441	4.356	5.87711	7.52988e-09	4.84408e-08	9.37236
ALS2CL	0.595406	3.0712	5.87548	7.59956e-09	4.88437e-08	9.36342
PROS1	0.563719	3.87512	5.86309	8.15071e-09	5.21683e-08	9.29547
FGL2	0.656919	4.44655	5.85965	8.31066e-09	5.3143e-08	9.27661
SELPLG	0.516649	4.60684	5.85305	8.62574e-09	5.50308e-08	9.2405
IRX6	0.750328	1.25323	5.85138	8.70756e-09	5.54507e-08	9.23134
LYZ	0.938514	7.57054	5.84921	8.81448e-09	5.608e-08	9.2195
SHC3	0.511264	1.46908	5.84609	8.97098e-09	5.70234e-08	9.20242
STAP1	0.539311	1.7417	5.83497	9.54989e-09	6.05088e-08	9.14175
GRIN2D	-0.695298	1.86411	-5.83425	9.58907e-09	6.07016e-08	9.13778
SP8	-0.686108	0.347514	-5.82208	1.02674e-08	6.46415e-08	9.07146
CTSF	0.519294	4.74185	5.81999	1.03884e-08	6.52842e-08	9.06011
STOML3	0.652697	0.939967	5.81911	1.04397e-08	6.55179e-08	9.05532
AQP7	0.618822	1.25809	5.81569	1.06421e-08	6.66973e-08	9.0367
IQGAP2	0.557588	2.19355	5.81525	1.06684e-08	6.68316e-08	9.03431
CLUL1	0.506833	1.03774	5.81365	1.07643e-08	6.73717e-08	9.02562
ADM	-0.785057	3.29174	-5.79577	1.18976e-08	7.40301e-08	8.92853
LYPD6	-0.512848	0.549533	-5.7955	1.19161e-08	7.41119e-08	8.92702
ZP3	-0.559073	2.21392	-5.78707	1.24905e-08	7.73029e-08	8.88136
SORCS2	0.795679	2.57594	5.78664	1.25205e-08	7.74192e-08	8.87904
PRDM16	0.687056	1.80599	5.77963	1.30202e-08	8.03301e-08	8.84109
MNDA	0.658587	4.23275	5.77853	1.31007e-08	8.07905e-08	8.83511
HTR1D	-0.674882	1.30791	-5.77668	1.32362e-08	8.15537e-08	8.82513
VCAN	-0.729132	4.43821	-5.77582	1.33003e-08	8.1876e-08	8.82045
MMP14	-0.548551	6.28927	-5.75785	1.47002e-08	8.98548e-08	8.72342
FCGBP	0.931133	3.15326	5.755	1.49343e-08	9.12052e-08	8.7081
MOCOS	-0.505014	2.19595	-5.74981	1.53721e-08	9.37134e-08	8.68009
ZMAT4	-0.657314	0.0285477	-5.7439	1.58843e-08	9.66662e-08	8.64831
RASSF7	0.525386	5.35961	5.74369	1.59032e-08	9.67112e-08	8.64716
HYAL1	0.733584	2.79562	5.7415	1.6097e-08	9.7789e-08	8.63541
IL1R2	-0.63423	1.95742	-5.7389	1.63314e-08	9.90825e-08	8.6214
CD4	0.501255	5.19604	5.73186	1.69809e-08	1.02708e-07	8.5836
KLK12	-1.52488	1.49058	-5.71851	1.82839e-08	1.10109e-07	8.51194
HOXB7	-0.83788	3.09025	-5.71697	1.844e-08	1.10952e-07	8.5037
RETN	0.898228	2.4017	5.71191	1.89635e-08	1.13954e-07	8.47657
KNDC1	0.67376	1.68958	5.70495	1.97065e-08	1.18162e-07	8.43933
P4HA3	-0.534827	2.32935	-5.70088	2.01541e-08	1.20481e-07	8.41756
DSP	-0.848731	5.08703	-5.69863	2.04054e-08	1.21826e-07	8.40556
PYGL	-0.580945	4.10754	-5.69401	2.09322e-08	1.24649e-07	8.38086
MYOZ1	0.541888	1.64612	5.69375	2.0962e-08	1.24772e-07	8.37948
SNAI1	-0.572365	2.61349	-5.69023	2.13718e-08	1.26939e-07	8.36072
MFAP5	-0.78913	1.76512	-5.68375	2.21483e-08	1.31326e-07	8.32614
CA2	0.794063	3.43704	5.67861	2.27835e-08	1.34977e-07	8.29875
MARK1	-0.615756	1.81775	-5.67392	2.33779e-08	1.38321e-07	8.27379
TNNT1	-1.21094	2.53929	-5.66786	2.4169e-08	1.4288e-07	8.24156
TNIK	0.545321	2.53599	5.6624	2.49047e-08	1.4704e-07	8.21251
SCGB2A1	1.10437	2.22033	5.66003	2.52303e-08	1.48836e-07	8.19993
TTC29	0.533598	0.640519	5.65428	2.6038e-08	1.53145e-07	8.1694
HOXB9	-1.15006	0.887297	-5.65348	2.61525e-08	1.53753e-07	8.16516
C6orf118	0.610525	0.815376	5.65308	2.62095e-08	1.54023e-07	8.16305
EGFL7	0.573366	4.6372	5.64588	2.72646e-08	1.59748e-07	8.12482
IBSP	-0.726104	1.25485	-5.63443	2.90253e-08	1.69064e-07	8.06421
LST1	0.550527	4.09841	5.63295	2.92617e-08	1.70226e-07	8.05636
PLAU	-0.858054	5.71112	-5.62328	3.08475e-08	1.78851e-07	8.00525
RORC	0.617346	3.8747	5.62023	3.13648e-08	1.81622e-07	7.98915
ITGA11	-0.737862	2.42872	-5.61816	3.17199e-08	1.83449e-07	7.97825
IL20RB	-0.946121	1.83758	-5.60559	3.39662e-08	1.95786e-07	7.912
TRPM8	-0.735862	0.7649	-5.60019	3.49797e-08	2.01377e-07	7.88354
MYEOV	-1.02255	2.19659	-5.60006	3.5004e-08	2.01433e-07	7.88287
APOBEC3B	-0.758631	2.30164	-5.59056	3.68582e-08	2.11139e-07	7.8329
CARD14	-0.541374	1.60655	-5.58678	3.76209e-08	2.15329e-07	7.81308
BLK	0.563678	1.06385	5.58327	3.83435e-08	2.19194e-07	7.79466
PITX1	-0.879177	2.33192	-5.58155	3.87029e-08	2.21157e-07	7.78563
HOXC9	-0.758723	0.803648	-5.57883	3.92777e-08	2.24257e-07	7.77136
COL5A3	-0.550766	2.56479	-5.57642	3.97948e-08	2.26664e-07	7.7587
STYK1	-0.56915	2.74363	-5.5764	3.97975e-08	2.26664e-07	7.75863
THBS2	-0.785053	4.80439	-5.57523	4.00506e-08	2.27919e-07	7.7525
ENO2	-0.534869	4.29583	-5.56817	4.16115e-08	2.36413e-07	7.7155
EDARADD	-0.579674	1.21266	-5.55213	4.53785e-08	2.5603e-07	7.63163
GCLC	-0.768448	3.68164	-5.54851	4.62743e-08	2.60978e-07	7.61272
COL5A2	-0.678368	5.132	-5.54806	4.63854e-08	2.61498e-07	7.6104
NID2	-0.547614	1.79989	-5.54603	4.68979e-08	2.63859e-07	7.59977
LYPD1	-0.703648	1.7042	-5.54433	4.73285e-08	2.66165e-07	7.59092
RGN	0.559541	2.11085	5.54109	4.81629e-08	2.70528e-07	7.57401
TMPRSS11E	-1.1356	2.40305	-5.53984	4.84879e-08	2.72133e-07	7.56751
WNT11	0.544826	1.40724	5.53894	4.8724e-08	2.73237e-07	7.56281
CALCB	-0.543763	0.435807	-5.53105	5.08379e-08	2.84057e-07	7.52172
ID4	0.700247	3.44412	5.52284	5.31306e-08	2.95459e-07	7.47905
ICAM1	0.655521	6.5992	5.51232	5.62177e-08	3.11479e-07	7.42441
IRX3	0.787071	4.4044	5.51223	5.62454e-08	3.11508e-07	7.42394
TMEM171	-0.589988	1.28164	-5.50895	5.72431e-08	3.16401e-07	7.40693
AKAP14	0.582409	0.872061	5.50109	5.97047e-08	3.28566e-07	7.36621
UMODL1	-0.653936	0.955933	-5.49993	6.00793e-08	3.30365e-07	7.36016
TYRP1	0.518749	0.622677	5.49858	6.0514e-08	3.32096e-07	7.35319
FCN1	0.583809	2.53262	5.49566	6.14664e-08	3.36789e-07	7.33809
GABRA3	-0.631994	0.708819	-5.49423	6.19392e-08	3.38978e-07	7.33068
IGF2BP1	-0.73046	0.149252	-5.48914	6.36471e-08	3.46545e-07	7.30437
KISS1R	-0.643135	1.41638	-5.48756	6.4187e-08	3.49211e-07	7.2962
IER5L	-0.551079	3.26819	-5.48461	6.52093e-08	3.54633e-07	7.28092
JAG2	-0.519864	3.46784	-5.48298	6.57769e-08	3.57299e-07	7.27254
EHD2	0.516568	5.50852	5.47827	6.74517e-08	3.65823e-07	7.24823
C15orf48	-0.954825	5.75291	-5.47711	6.78713e-08	3.67811e-07	7.24224
SLC1A7	1.02634	2.01865	5.47616	6.82161e-08	3.69535e-07	7.23734
BMP2	0.719135	3.36323	5.45167	7.77186e-08	4.1726e-07	7.11126
ALOX5	0.561364	4.73142	5.45057	7.81759e-08	4.19227e-07	7.10559
DNAI1	0.55128	0.952835	5.44418	8.08723e-08	4.32515e-07	7.07281
PENK	0.648712	0.904879	5.44338	8.12195e-08	4.34037e-07	7.06867
CAV2	0.642769	3.99783	5.43909	8.30872e-08	4.43334e-07	7.0467
GSTA4	0.5312	4.18845	5.43234	8.61162e-08	4.57909e-07	7.01209
ZMYND10	0.695627	1.91834	5.42934	8.74975e-08	4.64898e-07	6.99671
EFHC2	0.534839	1.56593	5.42611	8.90061e-08	4.72008e-07	6.98019
KHDRBS2	0.625067	1.47732	5.41604	9.38757e-08	4.96124e-07	6.92872
NETO2	-0.506177	2.53464	-5.41384	9.49731e-08	5.01349e-07	6.91749
SFRP5	0.555677	0.880815	5.40635	9.88058e-08	5.20195e-07	6.87926
RASL11A	0.550332	3.30141	5.40505	9.94858e-08	5.23464e-07	6.87264
SLC44A4	0.815928	5.65421	5.39692	1.03848e-07	5.44671e-07	6.83118
UST	0.52549	2.00542	5.39342	1.05778e-07	5.54376e-07	6.81338
P2RY13	0.503472	2.4882	5.37289	1.17842e-07	6.14115e-07	6.70907
DPP4	0.907107	4.85939	5.36911	1.20199e-07	6.25458e-07	6.68994
CIB2	-0.553888	2.47813	-5.36849	1.20595e-07	6.27282e-07	6.68677
MOXD1	0.590348	3.60082	5.36492	1.22871e-07	6.37448e-07	6.66871
CX3CL1	0.713339	4.43346	5.36245	1.24476e-07	6.4505e-07	6.65617
NPTX2	-0.771844	1.32066	-5.35654	1.28392e-07	6.64846e-07	6.62626
EPYC	-0.583269	0.860851	-5.35319	1.30664e-07	6.75098e-07	6.60932
PHLDA3	0.5247	4.88835	5.34682	1.35089e-07	6.96144e-07	6.57716
TFAP2A	-0.606799	1.74031	-5.33488	1.43785e-07	7.38486e-07	6.51693
COL21A1	0.562005	1.90821	5.31637	1.5835e-07	8.06417e-07	6.42379
IGSF9	-0.638463	3.10073	-5.3148	1.59649e-07	8.12133e-07	6.41591
SLC16A14	-0.838656	2.80722	-5.30628	1.66881e-07	8.47989e-07	6.37315
VILL	0.657848	2.45319	5.30056	1.71918e-07	8.72515e-07	6.34445
SNCG	-0.920091	4.02951	-5.2876	1.83873e-07	9.27191e-07	6.27958
PNMA2	0.646388	2.8775	5.27784	1.93407e-07	9.72085e-07	6.2308
PPP1R1B	1.05257	3.64056	5.27721	1.94029e-07	9.74859e-07	6.2277
ENTPD3	0.622913	3.19582	5.27711	1.94133e-07	9.75026e-07	6.22719
EVPL	0.579514	4.63396	5.27647	1.94783e-07	9.77936e-07	6.22397
LRRC31	0.792889	1.73436	5.27199	1.99345e-07	1.00012e-06	6.20163
TNFSF11	-0.608008	1.30848	-5.26521	2.06452e-07	1.03353e-06	6.16783
GALNT12	0.509967	3.73003	5.25503	2.17582e-07	1.08571e-06	6.11719
VIL1	-1.06017	1.27027	-5.25449	2.1819e-07	1.08836e-06	6.11449
SYNGR3	-0.523966	1.47323	-5.25105	2.22091e-07	1.10622e-06	6.09741
ATP6V0D2	0.547019	1.61918	5.2505	2.22715e-07	1.10853e-06	6.0947
ACOX2	0.534915	2.83628	5.24073	2.342e-07	1.16236e-06	6.0462
TAS1R3	-0.515454	1.72037	-5.23345	2.43137e-07	1.20456e-06	6.01009
MMP9	-0.789102	5.65511	-5.23195	2.45019e-07	1.21302e-06	6.00265
SPNS2	0.641669	3.68974	5.22764	2.50502e-07	1.23662e-06	5.98132
CAPS	0.680886	4.0208	5.22726	2.50988e-07	1.23859e-06	5.97945
TNFSF15	0.55353	2.68153	5.22338	2.56028e-07	1.26166e-06	5.96028
FHL2	-0.658134	3.72593	-5.22271	2.56918e-07	1.26514e-06	5.95693
BIK	-0.576237	3.5897	-5.22256	2.57114e-07	1.26566e-06	5.9562
FOXA1	-0.651296	4.52219	-5.22226	2.57512e-07	1.26717e-06	5.9547
MMP15	0.505904	4.9364	5.22162	2.58358e-07	1.27043e-06	5.95154
GJB2	-0.902482	4.00619	-5.21158	2.71999e-07	1.32761e-06	5.90194
MDFI	-0.626611	3.80079	-5.20866	2.76093e-07	1.34475e-06	5.88754
GNA14	0.531815	3.24915	5.20705	2.78379e-07	1.35493e-06	5.87959
MMP24	0.574453	2.84779	5.2065	2.79152e-07	1.35774e-06	5.87691
LGI2	-0.606955	2.15226	-5.20592	2.79982e-07	1.3613e-06	5.87405
LGALS1	-0.518051	7.23077	-5.20441	2.8215e-07	1.36944e-06	5.86662
TBX15	-0.7239	2.1972	-5.19604	2.94481e-07	1.42281e-06	5.82538
LGR6	0.60662	1.7871	5.19387	2.97768e-07	1.43819e-06	5.81469
FGL1	-1.34894	1.72086	-5.19204	3.0056e-07	1.45067e-06	5.80569
CEBPD	0.541981	6.43964	5.18536	3.10977e-07	1.49521e-06	5.77285
GNG11	0.585178	3.84662	5.18469	3.12035e-07	1.49926e-06	5.76958
POSTN	-0.706896	5.92678	-5.18122	3.17607e-07	1.52445e-06	5.75252
PCSK1	-1.08424	0.648941	-5.16607	3.43066e-07	1.63757e-06	5.67822
PHYHD1	0.691432	3.30727	5.15451	3.63802e-07	1.72822e-06	5.62168
PLA2G12B	0.869857	1.5615	5.14156	3.88468e-07	1.8347e-06	5.55849
IGFBP3	-0.680783	5.70958	-5.13431	4.02973e-07	1.89932e-06	5.52318
GGT6	0.852029	2.63446	5.12942	4.13066e-07	1.9449e-06	5.49936
NKD2	0.513255	2.87491	5.12843	4.15124e-07	1.95393e-06	5.49457
PRSS3	-0.803402	1.02639	-5.12394	4.24648e-07	1.9974e-06	5.47273
MAP1LC3C	0.59144	1.8893	5.10056	4.77719e-07	2.23263e-06	5.35934
APOBEC2	0.531445	1.0006	5.0821	5.24128e-07	2.43311e-06	5.27009
CHST1	-0.535261	2.13389	-5.08141	5.25921e-07	2.44062e-06	5.2668
MSLN	1.43864	5.81649	5.081	5.27009e-07	2.44485e-06	5.26481
TMEM190	0.842257	1.81836	5.07974	5.30352e-07	2.45953e-06	5.25873
IL23A	-0.532311	2.14521	-5.07352	5.47142e-07	2.53232e-06	5.22873
CCL22	0.637011	2.98595	5.06914	5.59258e-07	2.58149e-06	5.20765
PTPRC	0.547939	4.06838	5.06841	5.61311e-07	2.58924e-06	5.20413
DIRAS3	0.627495	1.73564	5.06639	5.67012e-07	2.6138e-06	5.1944
KLHDC7B	-0.598271	2.36734	-5.05862	5.89439e-07	2.71087e-06	5.15708
POPDC3	-0.673195	0.737528	-5.05425	6.0245e-07	2.76887e-06	5.13607
KIF1A	-0.90675	1.17456	-5.03869	6.51024e-07	2.97534e-06	5.06147
CDC42EP1	0.513669	5.75301	5.03162	6.74302e-07	3.06958e-06	5.02768
IL7R	0.589513	4.13863	5.0284	6.85196e-07	3.11304e-06	5.01226
TFPI	0.673345	4.13303	5.01127	7.45952e-07	3.37578e-06	4.93056
GALNT14	-0.815927	2.71135	-5.00842	7.56557e-07	3.4182e-06	4.91698
CNTNAP2	-0.550002	0.64743	-5.00286	7.77691e-07	3.50454e-06	4.89049
LPL	0.846992	3.7418	5.00125	7.83895e-07	3.52791e-06	4.88285
FAM133A	-0.811513	0.697422	-4.98883	8.33495e-07	3.73899e-06	4.82387
SULT1A2	0.51749	2.15269	4.98009	8.70198e-07	3.8923e-06	4.78244
KLF4	0.58228	3.56972	4.97874	8.75993e-07	3.91443e-06	4.77606
PITX2	-0.798495	1.07385	-4.96933	9.17539e-07	4.09084e-06	4.73153
SOX2	-1.03097	2.6535	-4.96624	9.31617e-07	4.1496e-06	4.7169
HSPA1A	-0.506	5.49157	-4.95424	9.88148e-07	4.38397e-06	4.66029
SLC1A1	0.603907	2.85496	4.95239	9.97156e-07	4.4188e-06	4.65157
MDK	-0.630818	6.80845	-4.95193	9.9942e-07	4.42742e-06	4.64939
IGSF6	0.532076	4.18464	4.95182	9.99933e-07	4.42827e-06	4.64889
CCDC17	0.593681	1.75028	4.94126	1.05308e-06	4.63992e-06	4.59914
SFRP2	-0.90922	5.6444	-4.93955	1.0619e-06	4.67728e-06	4.59113
CPVL	0.555957	3.73554	4.93677	1.07646e-06	4.73689e-06	4.57805
HOXA10	-0.648485	0.762129	-4.93416	1.09027e-06	4.79005e-06	4.5658
SSTR1	0.566544	0.940028	4.91634	1.18938e-06	5.19259e-06	4.48223
PTPRH	-0.756308	2.20977	-4.91448	1.20023e-06	5.23663e-06	4.47351
TREM2	0.570913	5.08981	4.91172	1.21646e-06	5.30412e-06	4.46061
SRD5A2	0.55664	1.04196	4.89608	1.31262e-06	5.69832e-06	4.38756
CAMK1D	0.51379	3.64316	4.88605	1.37814e-06	5.96778e-06	4.3408
GZMB	-0.675461	4.08997	-4.88294	1.39908e-06	6.05279e-06	4.32632
CALCA	-1.50424	1.76098	-4.87926	1.42421e-06	6.15573e-06	4.30923
SPEF1	0.506042	1.47158	4.87633	1.44455e-06	6.23973e-06	4.29563
CCL8	-0.672586	2.78929	-4.87202	1.47501e-06	6.3634e-06	4.27559
FMO3	0.510099	3.09241	4.86731	1.50902e-06	6.49998e-06	4.25372
SEC14L4	0.572154	1.97143	4.86329	1.5386e-06	6.61919e-06	4.23509
AATK	0.552064	1.9813	4.86221	1.54665e-06	6.6497e-06	4.23008
SRPK3	-0.543743	1.70992	-4.86064	1.55843e-06	6.69616e-06	4.2228
CLIC2	0.526418	4.14764	4.85929	1.56865e-06	6.73592e-06	4.21653
ORM1	0.917488	2.31299	4.85912	1.56989e-06	6.73914e-06	4.21577
CYP24A1	-1.0678	3.42364	-4.85276	1.61886e-06	6.92575e-06	4.1863
IL18	0.504947	3.83385	4.84661	1.66751e-06	7.11851e-06	4.15789
GALNT6	-0.628346	3.77127	-4.83262	1.78358e-06	7.56971e-06	4.09333
WFDC2	0.734547	8.0989	4.82178	1.87891e-06	7.95478e-06	4.04339
SOCS2	0.540835	2.33327	4.81288	1.96078e-06	8.26858e-06	4.00249
FNDC1	-0.723115	3.41994	-4.80705	2.01622e-06	8.48686e-06	3.97575
SST	-1.00427	0.818171	-4.80034	2.082e-06	8.7425e-06	3.94497
PXDN	-0.547222	4.00287	-4.79744	2.11103e-06	8.85634e-06	3.9317
PAEP	-1.47146	3.06993	-4.78363	2.25471e-06	9.40501e-06	3.86858
AUTS2	0.54392	3.32003	4.78302	2.26124e-06	9.42658e-06	3.86581
CCL20	-0.974091	4.0157	-4.77329	2.36843e-06	9.84087e-06	3.82142
CAPSL	0.723414	1.5587	4.77045	2.40063e-06	9.96571e-06	3.80847
CALML3	-0.661184	0.512539	-4.76601	2.45181e-06	1.01599e-05	3.78826
SCN3A	-0.502027	0.390346	-4.7601	2.52164e-06	1.04305e-05	3.76135
NKX2-1	0.768196	6.07822	4.75864	2.53909e-06	1.04965e-05	3.75474
BMP5	0.635441	2.5059	4.75612	2.56963e-06	1.06069e-05	3.74328
AKR7A3	-0.855991	2.23803	-4.75413	2.59398e-06	1.06943e-05	3.73425
CA10	0.534942	0.666915	4.75343	2.60266e-06	1.07241e-05	3.73105
CR2	0.666361	1.96864	4.73433	2.84866e-06	1.16649e-05	3.64453
CTXN1	-0.545012	3.10325	-4.73149	2.88715e-06	1.1805e-05	3.63168
RNF186	-0.567514	1.10646	-4.7278	2.93789e-06	1.19736e-05	3.615
CCL11	-0.608908	2.27	-4.71664	3.09652e-06	1.25684e-05	3.56464
SERPINA1	0.837719	6.78178	4.71252	3.15722e-06	1.27736e-05	3.54605
HTRA3	-0.591878	4.85913	-4.7085	3.2174e-06	1.30019e-05	3.52797
COL3A1	-0.664918	8.75996	-4.70799	3.22519e-06	1.30258e-05	3.52566
SORBS2	0.550454	2.46092	4.69581	3.41499e-06	1.37483e-05	3.47092
FBXO2	0.671186	3.47356	4.69183	3.47928e-06	1.39827e-05	3.45306
GPR171	0.558117	2.72289	4.68535	3.58647e-06	1.43968e-05	3.42402
ADRA2A	0.717221	2.69799	4.68319	3.62301e-06	1.45393e-05	3.41432
GDF15	0.78348	4.89192	4.67874	3.69913e-06	1.48276e-05	3.39442
ASS1	0.579271	5.34169	4.67751	3.7204e-06	1.49042e-05	3.38894
CHAD	0.546286	1.79265	4.66931	3.86582e-06	1.54288e-05	3.35225
EDN1	0.602475	4.40722	4.66691	3.90935e-06	1.5598e-05	3.34153
CD109	-0.575121	2.38659	-4.64643	4.30052e-06	1.70264e-05	3.25031
LYPD3	-0.710484	2.61209	-4.6428	4.3737e-06	1.72717e-05	3.23417
TXNRD1	-0.593717	5.41157	-4.6369	4.49506e-06	1.77156e-05	3.20799
NR0B2	0.865929	1.59494	4.62338	4.78589e-06	1.87976e-05	3.14805
HSD17B13	0.527396	1.03037	4.62161	4.8251e-06	1.89302e-05	3.14025
OSR2	-0.517958	1.65429	-4.62033	4.85386e-06	1.90323e-05	3.13456
AMOT	0.56874	2.32925	4.61532	4.9676e-06	1.94507e-05	3.11242
SIGLEC1	0.50229	3.09922	4.61501	4.97476e-06	1.94677e-05	3.11105
MAGEA3	-1.04807	0.661464	-4.61376	5.00354e-06	1.95748e-05	3.10553
CACNG6	0.552813	0.937207	4.60367	5.24209e-06	2.04159e-05	3.06101
LY6K	-0.789834	1.49212	-4.59912	5.35341e-06	2.0826e-05	3.04093
NRIP3	-0.519131	1.86136	-4.58458	5.72383e-06	2.21861e-05	2.97699
HOXB8	-0.673781	1.13509	-4.57961	5.8559e-06	2.26409e-05	2.9552
LTB	0.570216	4.81983	4.57056	6.1042e-06	2.35091e-05	2.91553
MAGEC2	-0.732072	0.144147	-4.56636	6.22284e-06	2.39328e-05	2.89714
INHBA	-0.552752	3.43807	-4.56629	6.22497e-06	2.39344e-05	2.89681
RHOV	-0.741573	3.75715	-4.56394	6.29237e-06	2.41734e-05	2.88653
PON3	0.671499	4.32094	4.56378	6.29675e-06	2.41835e-05	2.88586
TRPC6	0.574061	2.96144	4.55818	6.46033e-06	2.47774e-05	2.86137
EYA2	-0.803705	2.53793	-4.5568	6.50118e-06	2.49203e-05	2.85535
FABP3	0.661629	4.05287	4.53786	7.08829e-06	2.70064e-05	2.77279
HLA-DQA2	0.834067	5.48893	4.52941	7.36627e-06	2.79733e-05	2.73607
DUSP13	-0.618369	0.735812	-4.49569	8.58346e-06	3.23034e-05	2.59014
LRRC15	-0.680436	2.40486	-4.49436	8.63549e-06	3.24816e-05	2.58437
NGEF	-0.593885	1.72171	-4.48131	9.15946e-06	3.43034e-05	2.52818
ASCL1	-1.11871	1.17137	-4.47943	9.23746e-06	3.45862e-05	2.52009
ALDH3B2	-0.588691	2.4025	-4.47674	9.34996e-06	3.49885e-05	2.50855
CDKN2A	-0.809287	2.31109	-4.47211	9.54704e-06	3.56778e-05	2.48866
SYT7	-0.641535	3.67854	-4.46921	9.67264e-06	3.6118e-05	2.4762
SPP1	-0.886159	6.96361	-4.46663	9.78538e-06	3.65094e-05	2.46515
KLK14	-0.803577	1.29474	-4.45651	1.02406e-05	3.80951e-05	2.42179
OBP2A	-0.535474	0.614068	-4.45452	1.03324e-05	3.8416e-05	2.41328
FFAR2	-0.506628	1.34697	-4.45338	1.03851e-05	3.86015e-05	2.40844
MARCO	0.792755	5.22601	4.45302	1.04021e-05	3.86477e-05	2.40687
FGB	-1.43794	1.96187	-4.44873	1.06042e-05	3.93525e-05	2.38854
APOD	0.820819	4.32197	4.43972	1.10406e-05	4.07645e-05	2.3501
POU5F1	0.503397	0.790876	4.43108	1.14753e-05	4.22908e-05	2.31329
ORM2	0.789226	1.81257	4.42698	1.16871e-05	4.29913e-05	2.29587
THPO	-0.557137	1.2802	-4.41966	1.2075e-05	4.42653e-05	2.26476
CSF3R	0.575986	3.39036	4.4125	1.24661e-05	4.55426e-05	2.23439
FST	-0.664546	1.25848	-4.40784	1.27273e-05	4.64111e-05	2.21465
COL1A2	-0.575805	7.23521	-4.39714	1.3347e-05	4.85305e-05	2.16937
FAM83E	0.519082	4.46172	4.39684	1.33647e-05	4.85694e-05	2.1681
NMU	-0.768674	2.05448	-4.39556	1.34407e-05	4.87944e-05	2.1627
LEMD1	0.616924	1.73622	4.3952	1.34624e-05	4.88604e-05	2.16117
KRT80	-0.539364	3.91945	-4.3844	1.41222e-05	5.10944e-05	2.11561
AHNAK2	-0.682683	2.88625	-4.38329	1.4192e-05	5.13202e-05	2.11092
PRODH	0.686682	2.65723	4.38224	1.42581e-05	5.15322e-05	2.10649
GPT2	-0.523656	3.63178	-4.37502	1.47202e-05	5.30916e-05	2.07613
CXCL2	0.64167	5.08528	4.35099	1.63653e-05	5.84618e-05	1.97531
ALOX15	0.6287	1.33073	4.32398	1.84239e-05	6.52275e-05	1.86261
F13A1	0.609565	4.30841	4.32189	1.85931e-05	6.57424e-05	1.85392
HHLA2	0.950837	2.04464	4.31882	1.88438e-05	6.65271e-05	1.84118
SLC16A4	0.620813	3.85986	4.311	1.94984e-05	6.86632e-05	1.80872
ISG15	-0.59294	6.41999	-4.31038	1.95515e-05	6.88152e-05	1.80613
HABP2	0.795758	2.82948	4.28717	2.16307e-05	7.55956e-05	1.71008
TMEM45A	-0.560109	2.67626	-4.2865	2.16936e-05	7.5758e-05	1.70732
MUC15	0.723647	2.77399	4.28364	2.19649e-05	7.66283e-05	1.69551
CXCL14	1.08367	5.09326	4.2806	2.22559e-05	7.7546e-05	1.683
ANGPTL4	-0.760178	4.36475	-4.27172	2.31291e-05	8.03055e-05	1.64645
BEX2	0.621342	3.47277	4.2661	2.36989e-05	8.22223e-05	1.62332
CYP2S1	0.558544	3.46115	4.25813	2.45299e-05	8.49352e-05	1.59059
COL2A1	-0.527452	0.306013	-4.25624	2.47303e-05	8.55863e-05	1.58287
LRRC46	0.500724	1.99796	4.25494	2.48692e-05	8.60025e-05	1.57755
CDCA7	-0.517445	2.78736	-4.2519	2.51985e-05	8.70544e-05	1.56506
SRPX2	-0.582798	4.15611	-4.24869	2.55491e-05	8.80682e-05	1.55194
HOXB6	-0.571867	2.43343	-4.24415	2.60533e-05	8.96501e-05	1.53338
ALDH3A1	0.898878	2.60605	4.23307	2.73256e-05	9.37254e-05	1.48812
EPHA2	0.518864	4.5043	4.2213	2.87415e-05	9.82657e-05	1.44018
STEAP2	-0.506424	3.12669	-4.21847	2.90925e-05	9.93431e-05	1.42866
DUSP4	-0.622411	3.6767	-4.21262	2.98303e-05	0.000101513	1.4049
ESPN	-0.534209	2.56347	-4.20832	3.03849e-05	0.000103177	1.38742
ROPN1L	0.554623	1.39556	4.18746	3.32129e-05	0.000112115	1.30302
ERN2	0.797272	2.15128	4.17552	3.49426e-05	0.00011741	1.25488
DCBLD2	-0.506512	3.6919	-4.1585	3.75586e-05	0.000125504	1.18645
MMP1	-0.952026	4.39506	-4.14487	3.97856e-05	0.000132462	1.13187
ELF5	0.59016	1.99886	4.14293	4.01122e-05	0.000133486	1.12413
HTR3A	-0.65906	1.85776	-4.12987	4.23826e-05	0.000140535	1.07198
CEACAM6	0.911259	8.9915	4.12345	4.35424e-05	0.000144105	1.04641
PADI3	-0.529079	0.537599	-4.12034	4.41147e-05	0.00014579	1.03405
DNAJC12	-0.803839	3.12528	-4.11676	4.47834e-05	0.000147648	1.0198
SLC4A11	-0.534495	2.17788	-4.1061	4.68308e-05	0.000153885	0.977483
SYT13	-0.815644	1.29252	-4.10209	4.76224e-05	0.000156338	0.961618
GJB3	-0.71383	2.36444	-4.09203	4.96686e-05	0.00016221	0.921805
CHGB	-0.832943	1.08723	-4.0892	5.0259e-05	0.000163868	0.910625
SERPINB5	-0.771867	1.38866	-4.05304	5.84132e-05	0.000187847	0.768422
MXRA5	-0.529408	4.32237	-4.04598	6.0146e-05	0.000193016	0.740789
CXCL6	-0.62851	1.73716	-4.04027	6.1583e-05	0.000197157	0.718472
OGDHL	-0.51349	0.33341	-4.0393	6.18303e-05	0.000197826	0.714685
FLNC	-0.548924	1.85719	-4.02808	6.47595e-05	0.000206387	0.670945
PCSK2	0.810963	1.10947	4.00874	7.01209e-05	0.000222146	0.595811
LGALS4	0.991185	2.1346	3.99964	7.27882e-05	0.000229808	0.560558
S100P	-0.929491	5.55909	-3.99718	7.3524e-05	0.000231656	0.551061
KIF12	0.601307	2.56535	3.97871	7.92894e-05	0.000247675	0.479803
ITLN1	0.511746	1.18961	3.97455	8.06452e-05	0.000251633	0.463803
BIRC3	0.511511	4.18502	3.97344	8.10103e-05	0.000252658	0.459541
S100A2	-0.750564	3.64205	-3.97205	8.14689e-05	0.000253974	0.454214
PRAP1	-0.573633	0.805078	-3.96478	8.3918e-05	0.000261197	0.42627
NDUFA4L2	-0.507038	3.54062	-3.96151	8.50396e-05	0.000264451	0.413745
TEKT2	0.534219	1.9391	3.95609	8.69322e-05	0.000269913	0.392983
IYD	0.504101	1.47591	3.95452	8.74865e-05	0.000271512	0.386988
ALDH1A1	0.654752	5.15265	3.93123	9.61359e-05	0.000296298	0.298097
DUOX2	0.504996	1.30593	3.92148	9.9993e-05	0.000306975	0.261023
NELL1	0.670751	1.18299	3.91799	0.00010141	0.000310961	0.247767
SCUBE2	0.532404	1.8627	3.91037	0.000104566	0.000319719	0.218891
PPP1R14C	0.605176	3.43411	3.90989	0.000104764	0.000320256	0.217104
FXYD3	0.622937	4.91748	3.90355	0.000107469	0.00032845	0.193095
SIX2	-0.598504	1.89893	-3.89989	0.000109057	0.000332644	0.179279
PKIB	-0.540108	2.00447	-3.87808	0.000119002	0.000359968	0.0971066
ENO3	-0.541837	1.85144	-3.87395	0.000120977	0.000365542	0.081617
HKDC1	0.534435	3.1227	3.85781	0.000129006	0.000387269	0.0211503
RNF128	0.661777	3.01487	3.83204	0.000142881	0.000425328	-0.0749238
APOC1	0.507655	6.19773	3.80732	0.000157498	0.000465242	-0.166462
ANKRD1	0.56227	1.15946	3.79048	0.000168257	0.000494284	-0.22853
DPT	0.503351	4.2771	3.78706	0.000170525	0.000500204	-0.241102
SCIN	-0.579327	2.94588	-3.77807	0.000176619	0.000516659	-0.274069
MYCN	-0.551614	1.07611	-3.76509	0.000185791	0.000540976	-0.321585
CAPN9	0.597117	2.19694	3.75043	0.000196688	0.000569474	-0.375057
FAM3D	0.62685	2.15604	3.73242	0.000210898	0.000607571	-0.440473
PI3	-0.721126	2.65706	-3.71886	0.000222224	0.00063702	-0.489505
CCL18	0.591557	6.51937	3.71258	0.000227663	0.000651669	-0.512165
SERPINB4	-0.570892	0.642625	-3.70886	0.000230949	0.000659711	-0.52559
LDLRAD1	0.579479	1.84607	3.70344	0.000235807	0.000672202	-0.54509
CLIC6	0.69539	5.48557	3.66753	0.000270522	0.000762069	-0.673669
RBP4	0.560867	1.87078	3.66561	0.000272501	0.000766877	-0.680492
SCEL	0.613448	4.49959	3.6639	0.000274284	0.000771413	-0.686592
CALML5	-0.641947	0.417909	-3.65993	0.000278455	0.00078219	-0.700711
RET	-0.550545	0.944265	-3.63926	0.000301168	0.000841048	-0.774042
CILP	-0.574049	2.65525	-3.62385	0.00031923	0.000885422	-0.82848
WFDC3	-0.554089	2.75073	-3.60462	0.00034318	0.00094617	-0.896062
AIM2	-0.566544	3.04477	-3.60141	0.000347342	0.000956691	-0.907318
IRX5	0.521167	3.10833	3.59243	0.000359219	0.000986074	-0.938711
